# Supplementary material for: Reactivity umpolung of the cycloheptatriene core in hexa(methoxycarbonyl)cycloheptatriene
Source: publisher site journal article supplement (doi:10.3762/bjoc.22.2), 2026-01-05
Supplement: Additional file 1 [file 1860-5397-22-2-S1.pdf]

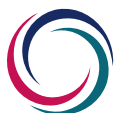

## Supporting Information

for

### Reactivity umpolung of the cycloheptatriene core in hexa(methoxycarbonyl)cycloheptatriene

Dmitry N. Platonov, Alexander Yu. Belyy, Rinat F. Salikov, Kirill S. Erokhin and Yury V. Tomilov

*Beilstein J. Org. Chem.* **2026**, 22, 64–70. doi:10.3762/bjoc.22.2

### Experimental procedures, product characterization, quantum chemical calculation details and copies of NMR spectra

## Table of Contents

|                                    |     |
|------------------------------------|-----|
| 1. General information .....       | S2  |
| 2. Experimental procedures .....   | S3  |
| 3. Computational data .....        | S7  |
| 4. Single crystal X-ray data ..... | S8  |
| 5. Spectral data.....              | S11 |
| 6. References .....                | S39 |

## 1. General information

### Materials

Unless noted otherwise, all reagents were obtained from commercial suppliers and used without additional purification. Hexa(methoxycarbonyl)cycloheptatriene (**3**) [1], phenyldiazonium tetrafluoroborate [2], 4-methoxyphenyldiazonium tetrafluoroborate [2], 4-nitrophenyldiazonium tetrafluoroborate [3] and 2-methoxycarbonylphenyldiazonium tetrafluoroborate [3] were obtained using literature procedures. All reagents and solvents are commercially available and used without additional purification.

### Instrumentations

**NMR spectroscopy:**  $^1\text{H}$  NMR and  $^{13}\text{C}$  NMR spectra were recorded on a Bruker AM-300 spectrometer ( $^1\text{H}$ : 300 MHz,  $^{13}\text{C}$ : 75 MHz). Chemical shifts are reported in parts per million (ppm), using tetramethylsilane for  $\text{CDCl}_3$  and residual solvent signal for  $\text{DMSO}-d_6$  as internal standards. Multiplicities were given as: s (singlet), d (doublet), t (triplet), m (multiplets), dd (doublet of doublets), dt (doublet of triplets), and br (broad). Coupling constants (J) were recorded in hertz (Hz).

**High-resolution mass spectrometry:** HRMS spectra were obtained with a Bruker microTOF II instrument (ESI, positive or negative ion modes, capillary voltage 4500 V).

**EI mass spectrometry:** EIMS spectra were recorded with a Finnigan MAT INCOS 50.

**Liquid chromatography:** TLC was performed on pre-coated plates Merck Silica Gel 60 GF254. Flash chromatography was performed on silica gel Machery-Nagel 60 40–60 mesh.

## 2. Experimental procedures

### General procedure for the halogenation reactions

To a solution of 250 mg (0.57 mmol) of hexa(methoxycarbonyl)cycloheptatriene **3** in 5 mL of CH<sub>3</sub>CN was added 76 mg (0.68 mmol) of *t*-BuOK and the reaction mixture was stirred for 30 min. Then 0.63 mmol of the corresponding halogen (in case of Cl<sub>2</sub> it was blown through until the dark blue solution became colorless). The solvent was removed in vacuo, the residue was dissolved in ethyl acetate, washed with water and dried over Na<sub>2</sub>SO<sub>4</sub>. Then the solvent was removed in vacuo, and the product was recrystallized from ethyl acetate.

*Hexamethyl 7-chlorocyclohepta-1,3,5-triene-1,2,3,4,5,6-hexacarboxylate (4a)* was obtained using chlorine in a yield of 95%, white crystals, mp 112–115°C.

<sup>1</sup>H NMR (CDCl<sub>3</sub>, 300 MHz): δ [ppm] 6.22 (s, 1H, CH), 3.86 (s, 6H, 2OMe), 3.84 (s, 6H, 2OMe), 3.82 (s, 6H, 2OMe).

<sup>13</sup>C NMR (CDCl<sub>3</sub>, 75 MHz): δ [ppm] 164.8, 164.7, 165.5, 137.8, 135.7, 132.0, 53.7, 53.5, 53.3, 46.9

HRMS (ESI+) *m/z*: [M + NH<sub>4</sub>]<sup>+</sup> Calcd. for C<sub>19</sub>H<sub>19</sub>ClO<sub>12</sub> 492.0903; Found: 492.0898.

*Hexamethyl 7-bromobicyclo[4.1.0]hepta-2,4-diene-1,2,3,4,5,7-hexacarboxylate (6b)* was obtained using bromine and purified by preparation of concentrated solution of the crude mixture in ethyl acetate and recrystallization at 4 °C to afford the product in a yield of 30%, white crystals, mp 181–184°C.

<sup>1</sup>H NMR (CDCl<sub>3</sub>, 300 MHz): δ [ppm] 3.90 (s, 1H, CH), 3.87 (s, 3H, OMe), 3.88 (s, 6H, 2OMe), 3.76 (s, 3H, OMe), 3.62 (s, 3H, OMe), 3.59 (s, 3H, OMe).

<sup>13</sup>C NMR (CDCl<sub>3</sub>, 75 MHz): δ [ppm] 167.1, 166.0, 165.9, 165.6, 165.1, 164.0, 132.4, 131.9, 130.5, 129.3, 53.1, 53.0, 53.0, 52.9, 52.7, 52.6, 39.1, 38.5, 33.6.

HRMS (ESI+) *m/z*: [M + NH<sub>4</sub>]<sup>+</sup> Calcd. for C<sub>19</sub>H<sub>19</sub>BrO<sub>12</sub> 536.098; Found: 536.0405.

*Hexamethyl 7-bromocyclohepta-1,3,5-triene-1,2,3,4,5,6-hexacarboxylate (4b)* was obtained by concentration of the mother liquor from **6b** and crystallization at 4 °C to afford the product in a yield of 60%, white crystals, mp 142–145°C.

<sup>1</sup>H NMR (CDCl<sub>3</sub>, 300 MHz): δ [ppm] 6.26 (s, 1H, CH), 3.87 (s, 6H, 2OMe), 3.85 (s, 6H, 2OMe), 3.82 (s, 6H, 2OMe).

<sup>13</sup>C NMR (CDCl<sub>3</sub>, 75 MHz): δ [ppm] 164.9, 164.7, 163.4, 138.7, 136.5, 134.3, 53.7, 53.6, 53.3, 34.7

HRMS (ESI+) *m/z*: [M + NH<sub>4</sub>]<sup>+</sup> Calcd. for C<sub>19</sub>H<sub>19</sub>BrO<sub>12</sub> 536.0398; Found: 536.0389.

*Hexamethyl 7-iodobicyclo[4.1.0]hepta-2,4-diene-1,2,3,4,5,7-hexacarboxylate (6c)* was obtained using iodine in a yield of 59%, brownish crystals, mp 189–191°C.

<sup>1</sup>H NMR (CDCl<sub>3</sub>, 300 MHz): δ [ppm] 3.85 (s, 3H, OMe), 3.83 (s, 3H, OMe), 3.90 (s, 1H, CH), 3.87 (s, 3H, OMe), 3.78 (s, 6H, 2OMe), 3.76 (s, 3H, OMe), 3.62 (s, 3H, OMe), 3.59 (s, 3H, OMe).

<sup>13</sup>C NMR (CDCl<sub>3</sub>, 75 MHz): δ [ppm] 167.1, 166.0, 165.9, 165.6, 165.2, 164.0, 132.4, 131.9, 130.5, 129.3, 53.1, 53.0, 53.0, 52.9, 52.7, 52.6, 39.0, 38.5, 33.6.

Experiments on obtaining ESI HRMS as well as EI MS spectra gave no results.

### General procedure for the alkylation reactions

To a solution of 250 mg (0.57 mmol) of hexa(methoxycarbonyl)cycloheptatriene (**3**) in 5 mL CH<sub>3</sub>CN was added 76 mg (0.68 mmol) of *t*-BuOK and the reaction mixture was stirred for 30 min. Then 0.63 mmol of the corresponding alkyl halide was added and the reaction mixture was heated at 60 °C for the appropriate time (30 h with methyl iodide and propargyl bromide, 20 h with benzyl bromide). The solvent was removed in vacuo, and the residue was purified by column chromatography on silica gel (chloroform/ethyl acetate 4:1) to afford the product.

An equilibrium mixture of hexamethyl 1-methylcyclohepta-2,4,6-triene-1,2,3,4,5,6-hexacarboxylate (**5d**) and hexamethyl 7-methylbicyclo[4.1.0]hepta-2,4-diene-1,2,3,4,5,7-hexacarboxylate (**6d**) (14:86) was obtained using methyl iodide in a yield of 73%, colorless oil °C. A <sup>1</sup>H NMR allowed to distinguish the signals of both compounds, a <sup>13</sup>C NMR did not. The ratio was determined by integration of signals of methyl groups.

*Hexamethyl 1-methylcyclohepta-2,4,6-triene-1,2,3,4,5,6-hexacarboxylate (5d)*

<sup>1</sup>H NMR (300 MHz, CDCl<sub>3</sub>) δ [ppm] 7.98 (s, 1H, CH), 3.80-3.40 (6x s, 18H, OMe), 1.58 (s, 3H, Me).

*Hexamethyl 7-methylbicyclo[4.1.0]hepta-2,4-diene-1,2,3,4,5,7-hexacarboxylate (6d)*

<sup>1</sup>H NMR (300 MHz, CDCl<sub>3</sub>) δ [ppm] 3.78 (s, 3H, OMe), 3.75 (s, 6H, OMe), 3.74 (s, 3H, OMe), 3.71 (s, 3H, OMe), 3.69 (s, 1H, CH), 3.59 (s, 3H, OMe), 1.00 (s, 3H, Me).

*An equilibrium mixture of 5d and 6d*

<sup>13</sup>C NMR (75 MHz, CDCl<sub>3</sub>) δ [ppm] 171.3, 170.4, 167.1, 166.6, 165.7, 165.4, 165.1, 165.0, 164.9, 164.4, 164.0, 163.8, 145.9, 140.8, 138.5, 135.1, 133.9, 133.0, 132.6, 132.0, 131.1, 130.1, 128.4, 127.8, 127.2, 65.7, 53.1, 53.0, 52.9, 52.9, 52.8, 52.7, 52.6, 49.1, 40.8, 37.0, 22.6, 19.5, 15.1, 10.4.

HRMS (ESI+) m/z: [M + NH<sub>4</sub>]<sup>+</sup> Calcd. for C<sub>20</sub>H<sub>22</sub>O<sub>12</sub> 472.1450; Found: 472.1462.

*An equilibrium mixture of hexamethyl 1-(prop-2-yn-1-yl)cyclohepta-2,4,6-triene-1,2,3,4,5,6-hexacarboxylate (5e) and hexamethyl 7-(prop-2-yn-1-yl)bicyclo[4.1.0]hepta-2,4-diene-1,2,3,4,5,7-hexacarboxylate (6e) (23:77) was obtained using propargyl bromide in a yield of 96%, colorless oil. The ratio was determined by integration of signals of alkyne CH-groups.*

<sup>1</sup>H NMR (300 MHz, CDCl<sub>3</sub>) δ [ppm] 7.32 (s, CH), 4.16 – 3.49 (m, 12H), 3.32 – 3.02 (m), 2.84 (dd, *J* = 17.6, 2.4 Hz, 2H), 2.16 (br. s, CH), 1.99 (t, *J* = 2.4 Hz, 1H), 1.76 (dd, *J* = 17.6, 2.4 Hz).

<sup>13</sup>C NMR (75 MHz, CDCl<sub>3</sub>) δ [ppm] 169.5, 167.8, 166.7, 165.6, 165.2, 164.7, 164.4, 137.0, 133.9, 133.3, 132.9, 131.9, 131.4, 129.7, 128.8, 78.5, 70.8, 53.4, 53.3, 53.1, 53.1, 53.0, 52.9, 43.9, 42.2, 40.6, 35.8, 26.1, 15.8.

HRMS (ESI+) m/z: [M + NH<sub>4</sub>]<sup>+</sup> Calcd. for C<sub>22</sub>H<sub>22</sub>O<sub>12</sub> 496.1450; Found: 496.1464

*Hexamethyl 7-benzylbicyclo[4.1.0]hepta-2,4-diene-1,2,3,4,5,7-hexacarboxylate (6f) was obtained using benzyl bromide in a yield of 82%, white crystals, mp 128–131°C.*

<sup>1</sup>H NMR (CDCl<sub>3</sub>, 300 MHz): δ [ppm] 7.12-7.25 (m, 3H, Ph), 7.00-7.14 (m, 2H, Ph), 3.85 (s, 3H, OMe), 3.83 (s, 3H, OMe), 3.81 (s, 3H, OMe), 3.79 (s, 1H, CH), 3.76 (s, 3H, OMe), 3.72 (s, 3H, OMe), 3.67 (s, 3H, OMe), 3.30 (d, 1H, *J*=5.0Hz, CH<sub>2</sub>), 2.23 (d, 1H, *J*=5.0Hz, CH<sub>2</sub>).

<sup>13</sup>C NMR (CDCl<sub>3</sub>, 75 MHz): δ [ppm] 169.9, 167.5, 165.8, 165.6, 164.9, 164.8, 136.3, 133.4, 133.1, 130.1, 129.0, 128.3, 126.9, 53.1, 53.1, 53.1, 53.0, 53.0, 39.2, 36.1, 31.3, 28.7.

HRMS (ESI+) m/z: [M + NH<sub>4</sub>]<sup>+</sup> Calcd. for C<sub>26</sub>H<sub>26</sub>O<sub>12</sub> 548.1763; Found: 548.1768.

### **Synthesis of hexamethyl 1*H*-1,3-methanocyclopropa[cd]indene-2a,2a1,3,4,5,5a(2*H*,2*bH*)-hexacarboxylate (7g).**

To a solution of 100 mg (0.23 mmol) of hexa(methoxycarbonyl)cycloheptatriene (**3**) in 2 mL CH<sub>3</sub>CN in a sealed vial was added 52 mg (0.46 mmol) of *t*-BuOK and the reaction mixture was stirred for 30 min. Then 0.12 mL (1.36 mmol) of allyl bromide were added and the reaction mixture was heated at 80 °C for 36 h. The solvent was removed in vacuo, and the residue was purified by column chromatography on silica gel (toluene/ethyl acetate 4:1) and additionally recrystallized from methanol to afford the product in a yield of 55%, white crystals, mp 132–134°C.

<sup>1</sup>H NMR (300 MHz, CDCl<sub>3</sub>) δ [ppm] 3.82 (s, 3H), 3.82 (s, 3H), 3.81 (s, 3H), 3.77 (s, 3H), 3.76 (s, 3H), 3.69 (s, 3H), 3.02 (s, 1H), 2.88 (dd, *J* = 12.2, 5.3 Hz, 1H), 2.42 (dd, *J* = 7.7, 5.2 Hz, 1H), 2.02 (d, *J* = 12.1 Hz, 1H), 1.89 (d, *J* = 12.4 Hz, 1H), 1.69 – 1.62 (m, 1H).

$^{13}\text{C}$  NMR (75 MHz,  $\text{CDCl}_3$ )  $\delta$  [ppm] 171.8, 170.1, 168.5, 167.7, 165.3, 164.2, 144.2, 139.8, 59.3, 52.9, 52.9, 52.6, 52.5, 52.5, 52.4, 49.9, 49.5, 43.4, 39.2, 36.3, 35.9, 35.7.

HRMS (ESI+)  $m/z$ :  $[\text{M} + \text{Na}]^+$  Calcd. for  $\text{C}_{22}\text{H}_{24}\text{O}_{12}$  503.1160; Found: 548.1768.

### General procedure for the reactions of anion **2** with aryldiazonium salts

To a solution of 250 mg (0.57 mmol) of hexa(methoxycarbonyl)cycloheptatriene (**3**) in 5 mL  $\text{CH}_3\text{CN}$  was added 76 mg (0.68 mmol) of *t*-BuOK and the reaction mixture was stirred for 30 min. Then 0.63 mmol of the corresponding diazonium tetrafluoroborate was added and the reaction mixture was stirred at room temperature for another hour. The solvent was removed in vacuo, the residue was purified by column chromatography on silica gel (chloroform/ethyl acetate 4:1) to afford the products.

Hexamethyl 1-phenyl-1*H*-indazole-3,3*a*,5,6,7,7*a*-hexacarboxylate (**8h**) was obtained using phenyldiazonium tetrafluoroborate in a yield of 51%, yellow non-crystalline solid, mp 165–166°C.

$^1\text{H}$  NMR ( $\text{DMSO-d}_6$ , 300 MHz):  $\delta$  [ppm] 7.25-7.40 (m, 5H, Ph), 7.00 (s, 1H, =CH-), 3.80 (s, 6H, 2OMe), 3.78 (s, 3H, OMe), 3.72 (s, 3H, OMe), 3.53 (s, 3H, OMe), 3.34 (s, 3H, OMe).

$^{13}\text{C}$  NMR ( $\text{DMSO-d}_6$ , 75 MHz):  $\delta$  [ppm] 166.5, 166.4, 166.3, 164.2, 163.6, 161.6, 141.2, 138.2, 133.7, 133.2, 128.8, 127.9, 127.3, 126.6, 123.5, 79.8, 66.5, 54.7, 54.0, 53.6, 53.5, 53.1, 53.1.

HRMS (ESI+)  $m/z$ :  $[\text{M} + \text{H}]^+$  Calcd. for  $\text{C}_{23}\text{H}_{22}\text{N}_2\text{O}_{10}$  545.1402; Found: 545.1399.

Hexamethyl 1-phenyl-1*H*-indazole-3,3*a*,4,5,6,7*a*-hexacarboxylate (**9h**) was obtained using phenyldiazonium tetrafluoroborate in a yield of 42%, white crystals, mp 128–131°C.

$^1\text{H}$  NMR ( $\text{CDCl}_3$ , 300 MHz):  $\delta$  [ppm] 7.11-7.35 (m, 5H, Ph), 7.08 (s, 1H, =CH-), 3.85 (s, 3H, OMe), 3.84 (s, 3H, OMe), 3.78 (s, 6H, 2OMe), 3.77 (s, 1H, CH), 3.73 (s, 3H, OMe).

$^{13}\text{C}$  NMR ( $\text{CDCl}_3$ , 75 MHz):  $\delta$  [ppm] 167.2, 166.5, 165.8, 164.9, 164.0, 161.3, 141.0, 136.2, 133.8, 130.8, 129.6, 129.5, 129.4, 124.8, 119.1, 79.8, 66.5, 54.7, 54.0, 53.6, 53.5, 53.1, 53.1.

HRMS (ESI+)  $m/z$ :  $[\text{M} + \text{NH}_4]^+$  Calcd. for  $\text{C}_{23}\text{H}_{22}\text{N}_2\text{O}_{10}$  545.1402; Found: 545.1798.

Hexamethyl 1-(4-methoxyphenyl)-1*H*-indazole-3,3*a*,5,6,7,7*a*-hexacarboxylate (**8i**) was obtained using 4-methoxyphenyldiazonium tetrafluoroborate in a yield of 66%, yellow crystals, mp 162–165°C.

$^1\text{H}$  NMR ( $\text{CDCl}_3$ , 300 MHz):  $\delta$  [ppm] 7.33-7.38 (m, 2H,  $\text{C}_6\text{H}_4$ ), 7.21 (s, 1H, =CH-), 6.79-6.85 (m, 2H,  $\text{C}_6\text{H}_4$ ), 3.94 (s, 3H, OMe), 3.87 (s, 3H, OMe), 3.84 (s, 3H, OMe), 3.78 (s, 6H, 2OMe), 3.59 (s, 3H, OMe), 3.35 (s, 3H, OMe).

$^{13}\text{C}$  NMR ( $\text{CDCl}_3$ , 75 MHz):  $\delta$  [ppm] 166.9, 166.6, 166.6, 163.9, 163.3, 161.9, 159.0, 138.0, 134.0, 133.7, 132.1, 128.9, 126.3, 122.4, 113.5, 79.7, 66.3, 55.4, 53.9, 53.1, 52.9, 52.8, 52.6, 52.4.

HRMS (ESI+)  $m/z$ :  $[\text{M} + \text{NH}_4]^+$  Calcd. for  $\text{C}_{24}\text{H}_{24}\text{N}_2\text{O}_{11}$  592.1773; Found: 592.1771.

Hexamethyl 1-(4-methoxyphenyl)-1*H*-indazole-3,3*a*,4,5,6,7*a*-hexacarboxylate (**9i**) was obtained using 4-methoxyphenyldiazonium tetrafluoroborate in a yield of 33%, yellow non-crystalline solid.

$^1\text{H}$  NMR ( $\text{CDCl}_3$ , 300 MHz):  $\delta$  [ppm] 7.14-7.18 (m, 2H,  $\text{C}_6\text{H}_4$ ), 6.95 (s, 1H, =CH-), 6.83-6.87 (m, 2H,  $\text{C}_6\text{H}_4$ ), 3.84 (s, 3H, OMe), 3.81 (s, 3H, OMe), 3.78 (s, 6H, 2OMe), 3.77 (s, H, OMe), 3.76 (s, 3H, OMe), 3.71 (s, 3H, OMe).

$^{13}\text{C}$  NMR (126 MHz,  $\text{DMSO-d}_6$ ):  $\delta$  [ppm] 167.0, 166.5, 165.8, 164.8, 164.0, 161.3, 157.7, 135.5, 134.2, 130.7, 129.7, 129.3, 128.5, 126.7, 123.2, 114.4, 113.3, 80.4, 55.5, 53.9, 53.8, 52.9, 52.9, 52.8, 52.5.

HRMS (ESI+)  $m/z$ :  $[\text{M} + \text{NH}_4]^+$  Calcd. for  $\text{C}_{24}\text{H}_{24}\text{N}_2\text{O}_{11}$  592.1773; Found: 592.1775.

Hexamethyl 1-(4-nitroxyphenyl)-1*H*-indazole-3,3*a*,5,6,7,7*a*-hexacarboxylate (**8j**) was obtained using 4-nitrophenyldiazonium tetrafluoroborate in a yield of 41%, orange non-crystalline solid.

$^1\text{H}$  NMR ( $\text{CDCl}_3$ , 300 MHz):  $\delta$  [ppm] 8.17 (d, 2H,  $J=9.0$  Hz,  $\text{C}_6\text{H}_4$ ), 7.56 (d, 2H,  $J=9.0$  Hz,  $\text{C}_6\text{H}_4$ ), 7.19 (s, 1H, =CH-), 3.96 (s, 3H, OMe), 3.93 (s, 3H, OMe), 3.85 (s, 3H, OMe), 3.80 (s, 3H, OMe), 3.58 (s, 3H, OMe), 3.53 (s, 3H, OMe).

$^{13}\text{C}$  NMR ( $\text{CDCl}_3$ , 75 MHz):  $\delta$  [ppm] 166.5, 166.2, 165.7, 164.4, 163.0, 161.4, 147.1, 145.8, 139.1, 136.3, 133.4, 127.2, 126.1, 123.7, 123.0, 79.0, 67.0, 54.2, 53.5, 53.2, 53.0, 53.0 52.8.

HRMS (ESI+)  $m/z$ :  $[\text{M} + \text{H}]^+$  Calcd. for  $\text{C}_{23}\text{H}_{21}\text{N}_3\text{O}_{12}$  590.1253; Found: 590.1254.

*Hexamethyl 1-(4-nitroxyphenyl)-1H-indazole-3,3a,4,5,6,7a-hexacarboxylate (9j)* was obtained using 4-nitrophenyldiazonium tetrafluoroborate in a yield of 19%, orange non-crystalline solid.

$^1\text{H}$  NMR ( $\text{CDCl}_3$ , 300 MHz):  $\delta$  [ppm] 8.22-8.27 (m, 2H,  $\text{C}_6\text{H}_4$ ), 7.25-7.30 (m, 2H,  $\text{C}_6\text{H}_4$ ), 7.11 (s, 1H, =CH-), 3.91 (s, 3H, OMe), 3.84 (s, 3H, OMe), 3.83 (s, 3H, OMe), 3.82 (s, 3H, OMe), 3.80 (s, 6H, 2OMe).

$^{13}\text{C}$  NMR ( $\text{CDCl}_3$ , 75 MHz):  $\delta$  [ppm] 166.5, 166.1, 165.7, 164.6, 163.6, 160.7, 146.0, 143.2, 139.4, 131.0, 130.4, 128.1, 125.5, 116.5, 114.1, 78.3, 66.7, 54.6, 54.2, 53.2, 53.1, 53.0 52.7.

HRMS (ESI+)  $m/z$ :  $[\text{M} + \text{NH}_4]^+$  Calcd. for  $\text{C}_{23}\text{H}_{21}\text{N}_3\text{O}_{12}$  607.1518; Found: 607.1518.

*Hexamethyl 1-(2-(methoxycarbonyl)phenyl)-1H-indazole-3,3a,5,6,7,7a-hexacarboxylate (8k)* was obtained using 2-methoxycarbonylphenyldiazonium tetrafluoroborate in a yield of 36%, yellow solid, mp 150–151°C.

$^1\text{H}$  NMR ( $\text{CDCl}_3$ , 300 MHz):  $\delta$  [ppm] 8.16 (d, 1H,  $J=8.0$  Hz,  $\text{C}_6\text{H}_4$ ), 7.91 (d, 1H,  $J=8.0$  Hz,  $\text{C}_6\text{H}_4$ ), 7.59 (t, 1H,  $J=8.0$  Hz,  $\text{C}_6\text{H}_4$ ), 7.42 (t, 1H,  $J=8.0$  Hz,  $\text{C}_6\text{H}_4$ ), 7.38 (s, 1H, =CH-), 3.85 (s, 6H, 2OMe), 3.82 (s, 3H, OMe), 3.80 (s, 3H, OMe), 3.73 (s, 3H, OMe), 3.65 (s, 3H, OMe), 3.20 (s, 3H, OMe).

$^{13}\text{C}$  NMR ( $\text{CDCl}_3$ , 75 MHz):  $\delta$  [ppm] 167.6, 167.5, 166.6, 165.0, 163.9, 163.7, 162.0, 139.2, 138.9, 133.9, 133.4, 132.7, 131.7, 131.1, 130.4, 129.1, 125.9, 120.5, 79.7, 66.3, 54.0, 53.3, 52.7, 52.6, 52.4 52.3, 52.1.

HRMS (ESI+)  $m/z$ :  $[\text{M} + \text{H}]^+$  Calcd. for  $\text{C}_{25}\text{H}_{24}\text{N}_2\text{O}_{12}$  603.1457; Found: 603.1461.

*Hexamethyl 7-(2-(2-(methoxycarbonyl)phenyl)hydrazineylidene)cyclohepta-1,3,5-triene-1,2,3,4,5,6-hexacarboxylate (10k)* was obtained using 2-methoxycarbonylphenyldiazonium tetrafluoroborate in a yield of 34%, orange non-crystalline solid.

$^1\text{H}$  NMR ( $\text{CDCl}_3$ , 300 MHz):  $\delta$  [ppm] 11.03 (s, 1H, NH), 7.86 (d, 2H,  $J=8.6$  Hz,  $\text{C}_6\text{H}_4$ ), 7.49 (t, 1H,  $J=8.6$  Hz,  $\text{C}_6\text{H}_4$ ), 6.94 (t, 1H,  $J=8.6$  Hz,  $\text{C}_6\text{H}_4$ ), 3.93 (s, 3H, OMe), 3.87 (s, 6H, 2OMe), 3.83 (s, 3H, OMe), 3.73 (s, 6H, 2OMe), 3.71 (s, 3H, OMe).

$^{13}\text{C}$  NMR ( $\text{CDCl}_3$ , 75 MHz):  $\delta$  [ppm] 167.6, 165.6, 165.4, 164.4, 163.3, 144.9, 135.3, 134.7, 134.5, 133.8, 132.9, 131.9, 131.0, 121.1, 114.7, 112.8, 53.5, 53.5 (2C), 53.4 (2C), 52.6, 52.2.

HRMS (ESI+)  $m/z$ :  $[\text{M} + \text{H}]^+$  Calcd. for  $\text{C}_{25}\text{H}_{24}\text{N}_2\text{O}_{12}$  603.1457; Found: 603.1454.

### 3. Computational data

Quantum chemical calculations were performed using ORCA 6.1 [4]. The CREST package identified the most stable conformers, for conformationally flexible species [5]. Geometries were optimized and frequencies were calculated at the r<sup>2</sup>SCAN-3c/CPCM(acetonitrile) level, while single-point energies were obtained at the revDSD-PBEP86(D4)/aug-ccpVTZ/CPCM(acetonitrile) level [6]. Fukui functions  $f^-$  calculated in the Multiwfn 3.8 program package [7]. The partial charges of the atoms were calculated in the IboView [8] software using the Effective Oxidation States [EOS] method [9]. Visualization was performed with IboView and IQmol program package.

In all cases where energetic parameters were considered, the following expression for Gibbs free energy of formation was used:

$$\Delta G_f(X) = \Delta G_f(\text{r2SCAN} - 3\text{c/CPCM}(\text{acetonitrile})) - E_{SPE}(\text{r2SCAN} - 3\text{c/CPCM}(\text{acetonitrile})) \\ + E_{SPE}(\text{revDSD} - \text{PBEP86}(\text{D4})/\text{aug} - \text{ccpVTZ}/\text{CPCM}(\text{acetonitrile})).$$

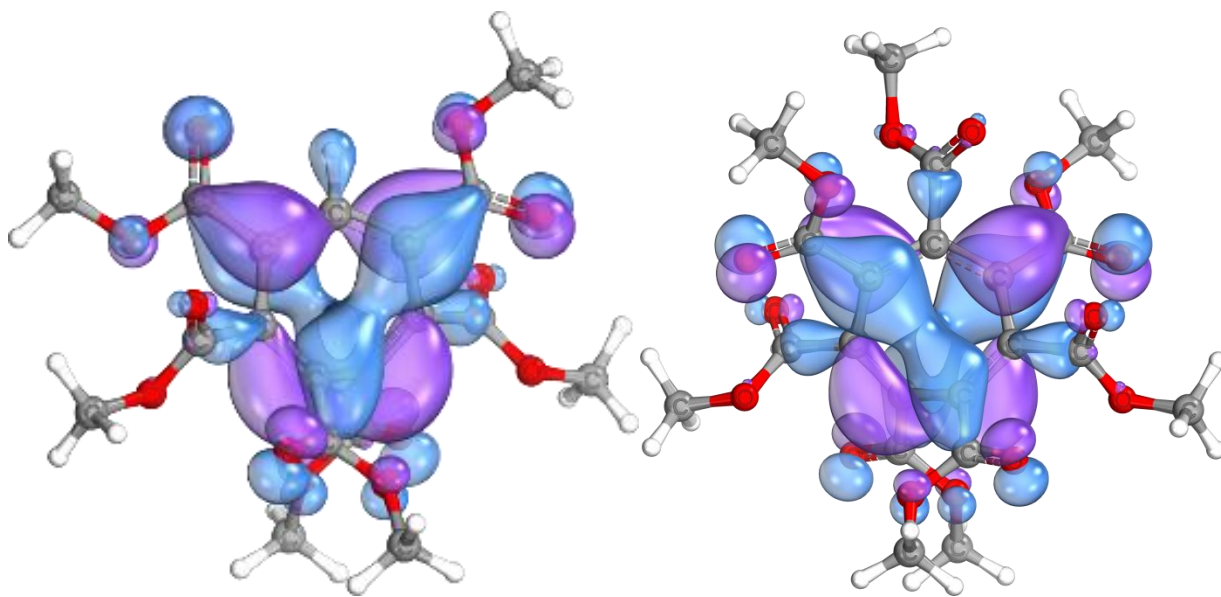

Figure S1: Highest occupied molecular orbitals of anions **2** and **1**.

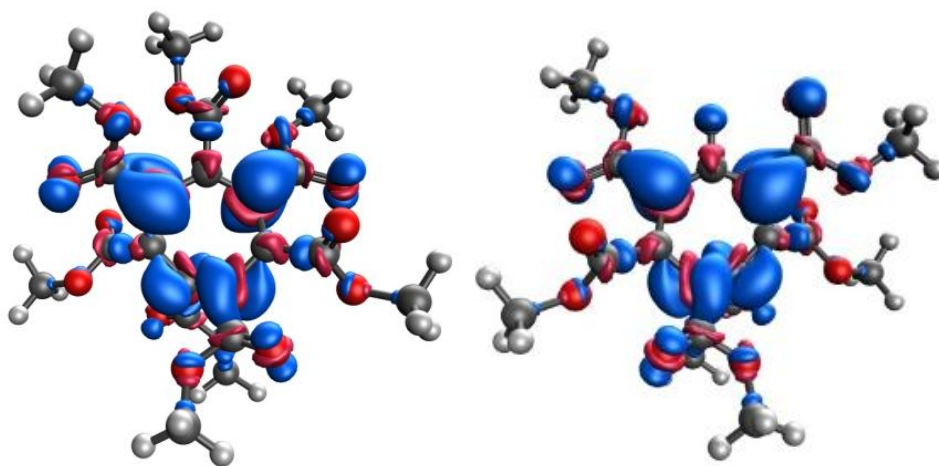

Figure S2: Fukui  $f^-$  function representations of anions **2** and **1**.



## 4. Single crystal X-ray data

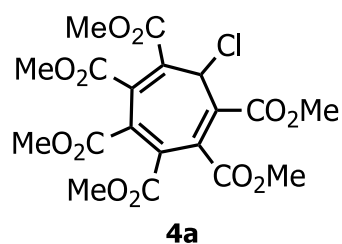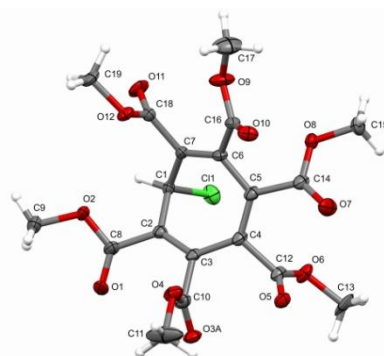

CCDC 2495984

**Figure S3.** ORTEP plot of the crystal structure of **4a**. Displacement ellipsoids for non-hydrogen atoms are shown at  $p = 50\%$ .

|                                   |                                                             |
|-----------------------------------|-------------------------------------------------------------|
| Identification code               | sci2536-1                                                   |
| Empirical formula                 | C <sub>19</sub> H <sub>19</sub> Cl O <sub>12</sub>          |
| Formula weight                    | 474.79                                                      |
| Temperature                       | 100.0(2) K                                                  |
| Wavelength                        | 1.54184 Å                                                   |
| Crystal system                    | Monoclinic                                                  |
| Space group                       | Cc                                                          |
| Unit cell dimensions              | a = 8.37810(10) Å<br>b = 20.2601(2) Å<br>c = 12.85380(10) Å |
| Volume                            | 2158.66(4) Å <sup>3</sup>                                   |
| Z                                 | 4                                                           |
| Density (calculated)              | 1.461 g/cm <sup>3</sup>                                     |
| Absorption coefficient            | 2.151 mm <sup>-1</sup>                                      |
| F(000)                            | 984                                                         |
| Crystal size                      | 0.44 x 0.23 x 0.07 mm <sup>3</sup>                          |
| Theta range for data collection   | 4.365 to 80.715°                                            |
| Index ranges                      | -10 ≤ h ≤ 10, -25 ≤ k ≤ 25, -16 ≤ l ≤ 16                    |
| Reflections collected             | 23741                                                       |
| Independent reflections           | 3829 [R(int) = 0.0474]                                      |
| Observed reflections              | 3821                                                        |
| Completeness to theta = 67.684°   | 100.0 %                                                     |
| Absorption correction             | Gaussian                                                    |
| Max. and min. transmission        | 1.000 and 0.312                                             |
| Refinement method                 | Full-matrix least-squares on F <sup>2</sup>                 |
| Data / restraints / parameters    | 3829 / 30 / 335                                             |
| Goodness-of-fit on F <sup>2</sup> | 1.120                                                       |
| Final R indices [I > 2σ(I)]       | R1 = 0.0445, wR2 = 0.0943                                   |
| R indices (all data)              | R1 = 0.0446, wR2 = 0.0944                                   |
| Absolute structure parameter      | 0.07(3)                                                     |
| Extinction coefficient            | 0.00071(7)                                                  |
| Largest diff. peak and hole       | 0.433 and -0.364 e.Å <sup>-3</sup>                          |

**Table S1.** X-ray crystallographic data of **2a**.

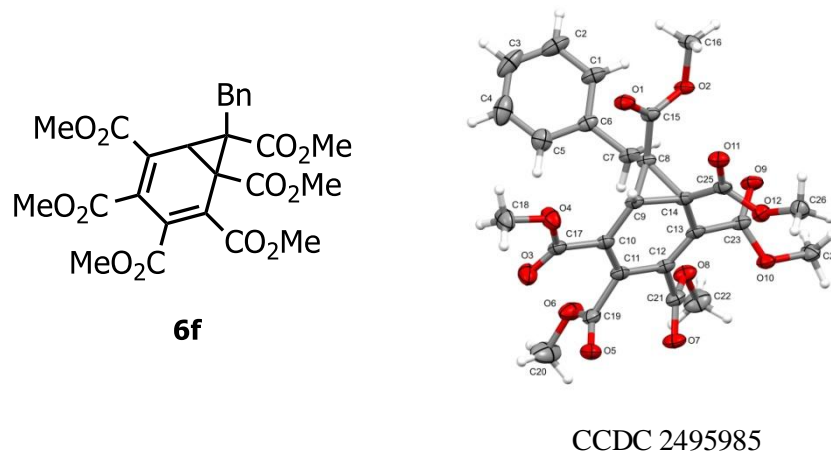

**Figure S4.** ORTEP plot of the crystal structure of **6f**. Displacement ellipsoids for non-hydrogen atoms are shown at  $p = 50\%$ .

|                                   |                                                              |
|-----------------------------------|--------------------------------------------------------------|
| Identification code               | sci2539                                                      |
| Empirical formula                 | C <sub>26</sub> H <sub>26</sub> O <sub>12</sub>              |
| Formula weight                    | 530.47                                                       |
| Temperature                       | 100.0(2) K                                                   |
| Wavelength                        | 1.54184 Å                                                    |
| Crystal system                    | Monoclinic                                                   |
| Space group                       | P2 <sub>1</sub> /c                                           |
| Unit cell dimensions              | a = 10.65500(10) Å<br>b = 27.8851(3) Å<br>c = 10.52470(10) Å |
| Volume                            | 2952.49(5) Å <sup>3</sup>                                    |
| Z                                 | 4                                                            |
| Density (calculated)              | 1.193 g/cm <sup>3</sup>                                      |
| Absorption coefficient            | 0.813 mm <sup>-1</sup>                                       |
| F(000)                            | 1112                                                         |
| Crystal size                      | 0.43 x 0.18 x 0.16 mm <sup>3</sup>                           |
| Theta range for data collection   | 3.170 to 79.772°.                                            |
| Index ranges                      | -13 ≤ h ≤ 13, -35 ≤ k ≤ 34, -12 ≤ l ≤ 13                     |
| Reflections collected             | 40060                                                        |
| Independent reflections           | 6380 [R(int) = 0.0358]                                       |
| Observed reflections              | 5823                                                         |
| Completeness to theta = 67.684°   | 100.0 %                                                      |
| Absorption correction             | Gaussian                                                     |
| Max. and min. transmission        | 1.000 and 0.541                                              |
| Refinement method                 | Full-matrix least-squares on F <sup>2</sup>                  |
| Data / restraints / parameters    | 6380 / 0 / 349                                               |
| Goodness-of-fit on F <sup>2</sup> | 1.031                                                        |
| Final R indices [I > 2σ(I)]       | R1 = 0.0408, wR2 = 0.1076                                    |
| R indices (all data)              | R1 = 0.0434, wR2 = 0.1095                                    |
| Extinction coefficient            | n/a                                                          |
| Largest diff. peak and hole       | 0.338 and -0.319 e.Å <sup>-3</sup>                           |

**Table S2.** X-ray crystallographic data of **6f**.

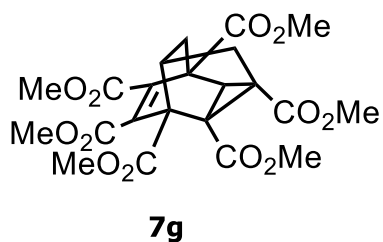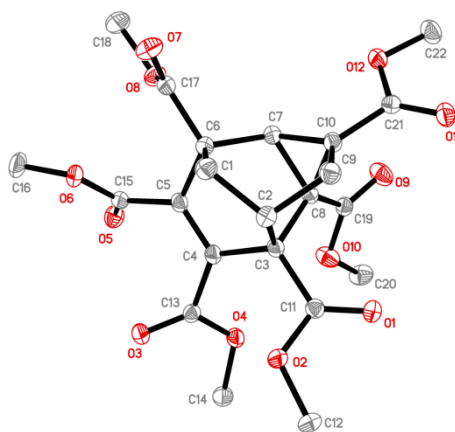

CCDC 2496140

**Figure S5.** ORTEP plot of the crystal structure of **7g**. Displacement ellipsoids for non-hydrogen atoms are shown at  $p = 50\%$ .

|                                   |                                                           |
|-----------------------------------|-----------------------------------------------------------|
| Identification code               | lit2232                                                   |
| Empirical formula                 | C <sub>22</sub> H <sub>24</sub> O <sub>12</sub>           |
| Formula weight                    | 480.41                                                    |
| Temperature                       | 99.97(16) K                                               |
| Wavelength                        | 1.54184 Å                                                 |
| Crystal system                    | Monoclinic                                                |
| Space group                       | C 1 2/c 1                                                 |
| Unit cell dimensions              | a = 23.9236(3) Å<br>b = 10.64412(9) Å<br>c = 18.3599(2) Å |
| Volume                            | 4347.17(8) Å <sup>3</sup>                                 |
| Z                                 | 8                                                         |
| Density (calculated)              | 1.468 g/cm <sup>3</sup>                                   |
| Absorption coefficient            | 1.038 mm <sup>-1</sup>                                    |
| F(000)                            | 2016                                                      |
| Crystal size                      | 0.15 x 0.12 x 0.08 mm <sup>3</sup>                        |
| Theta range for data collection   | 3.975 to 77.862°                                          |
| Index ranges                      | -30 ≤ h ≤ 30, -13 ≤ k ≤ 13, -23 ≤ l ≤ 23                  |
| Reflections collected             | 8491                                                      |
| Independent reflections           | 8491 [R(int) = 0]                                         |
| Observed reflections              | 7761                                                      |
| Completeness to theta = 67.684°   | 99.9 %                                                    |
| Absorption correction             | Semi-empirical from equivalents                           |
| Max. and min. transmission        | 1.00000 and 0.79462                                       |
| Refinement method                 | Full-matrix least-squares on F <sup>2</sup>               |
| Data / restraints / parameters    | 8491 / 0 / 315                                            |
| Goodness-of-fit on F <sup>2</sup> | 1.089                                                     |
| Final R indices [I > 2σ(I)]       | R1 = 0.0380, wR2 = 0.1061                                 |
| R indices (all data)              | R1 = 0.0406, wR2 = 0.1084                                 |
| Extinction coefficient            | 0.00020(5)                                                |
| Largest diff. peak and hole       | 0.359 and -0.249 e.Å <sup>-3</sup>                        |

**Table S3.** X-ray crystallographic data of **7g**.

## 5. Spectral data

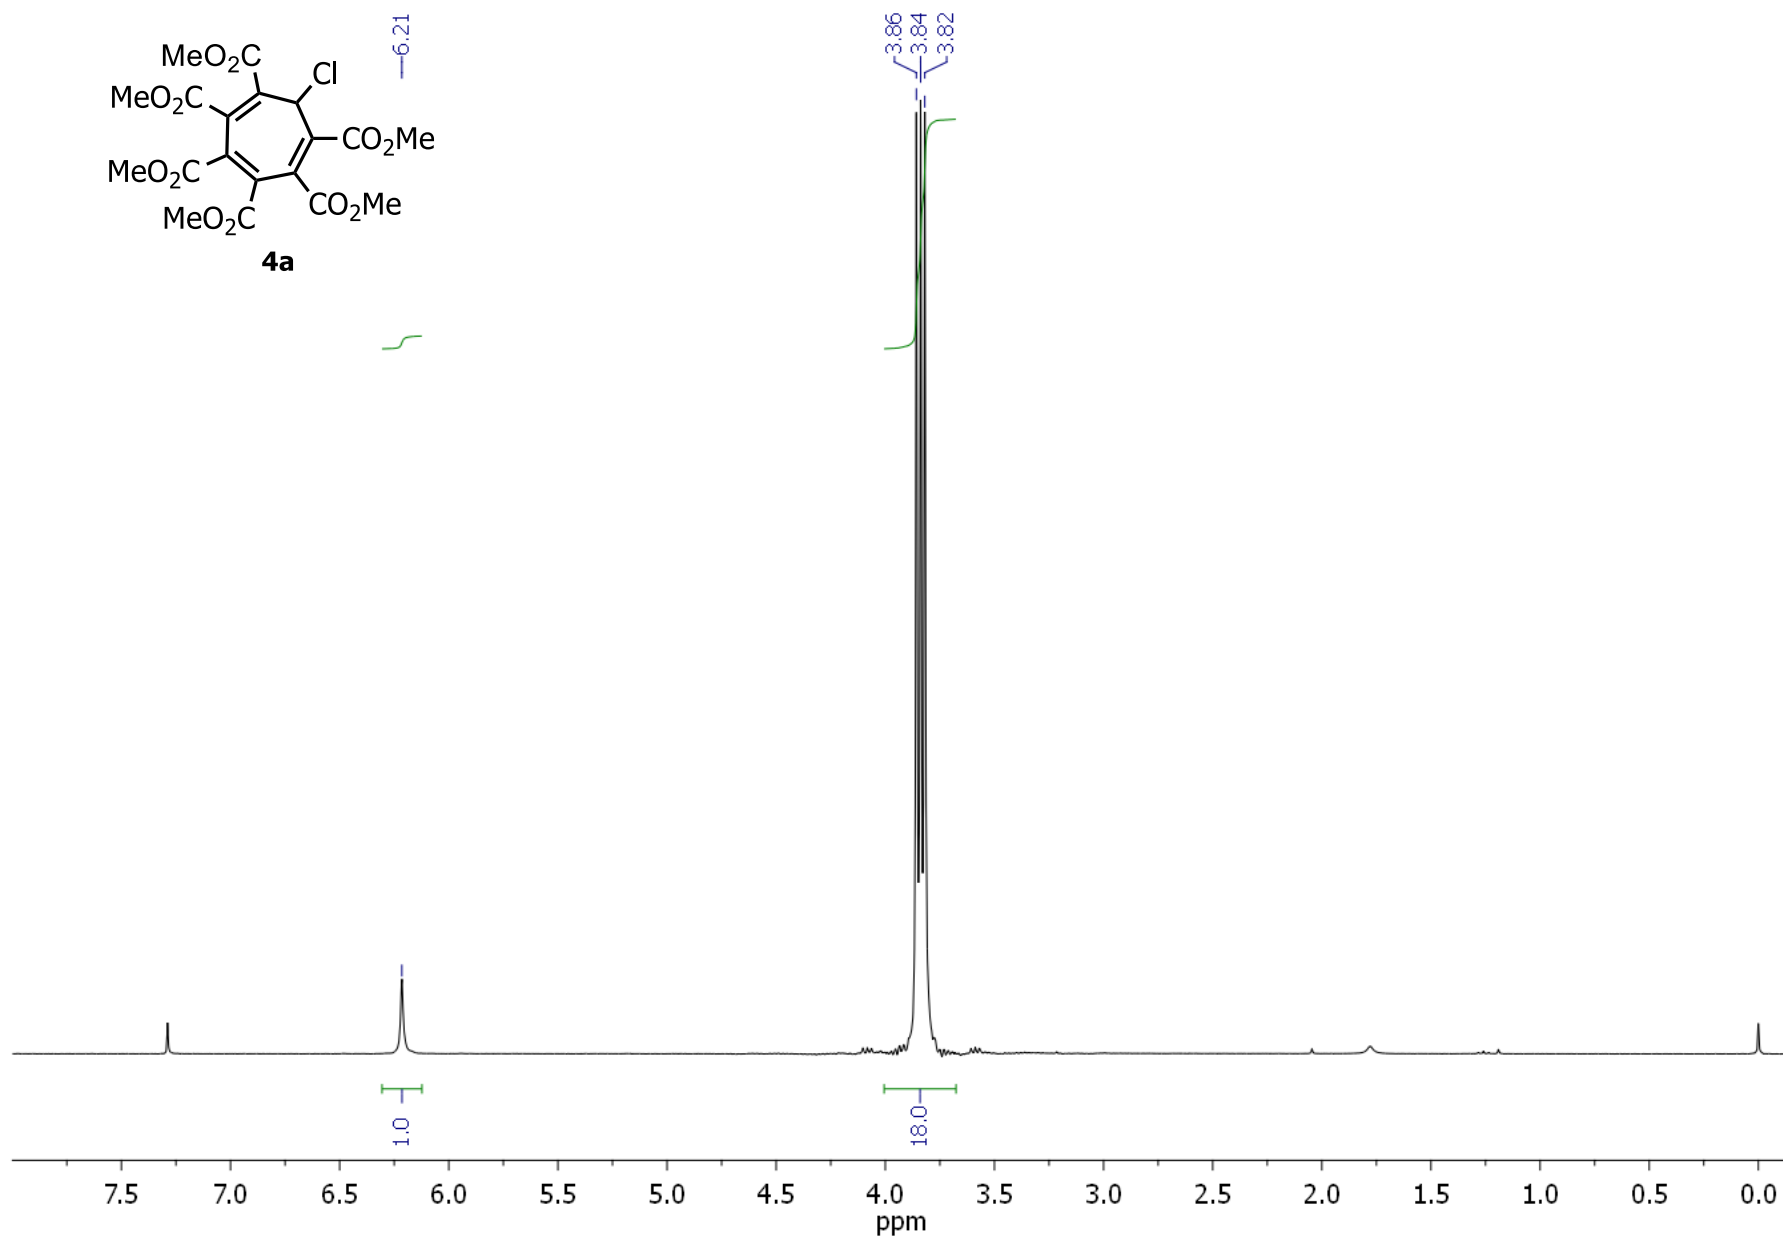

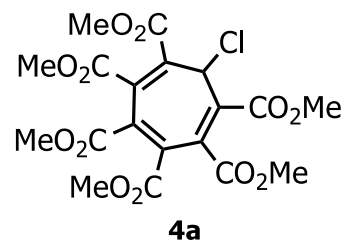

164.8  
164.6  
163.5

137.8  
135.7  
132.0

53.7  
53.5  
53.3  
46.9

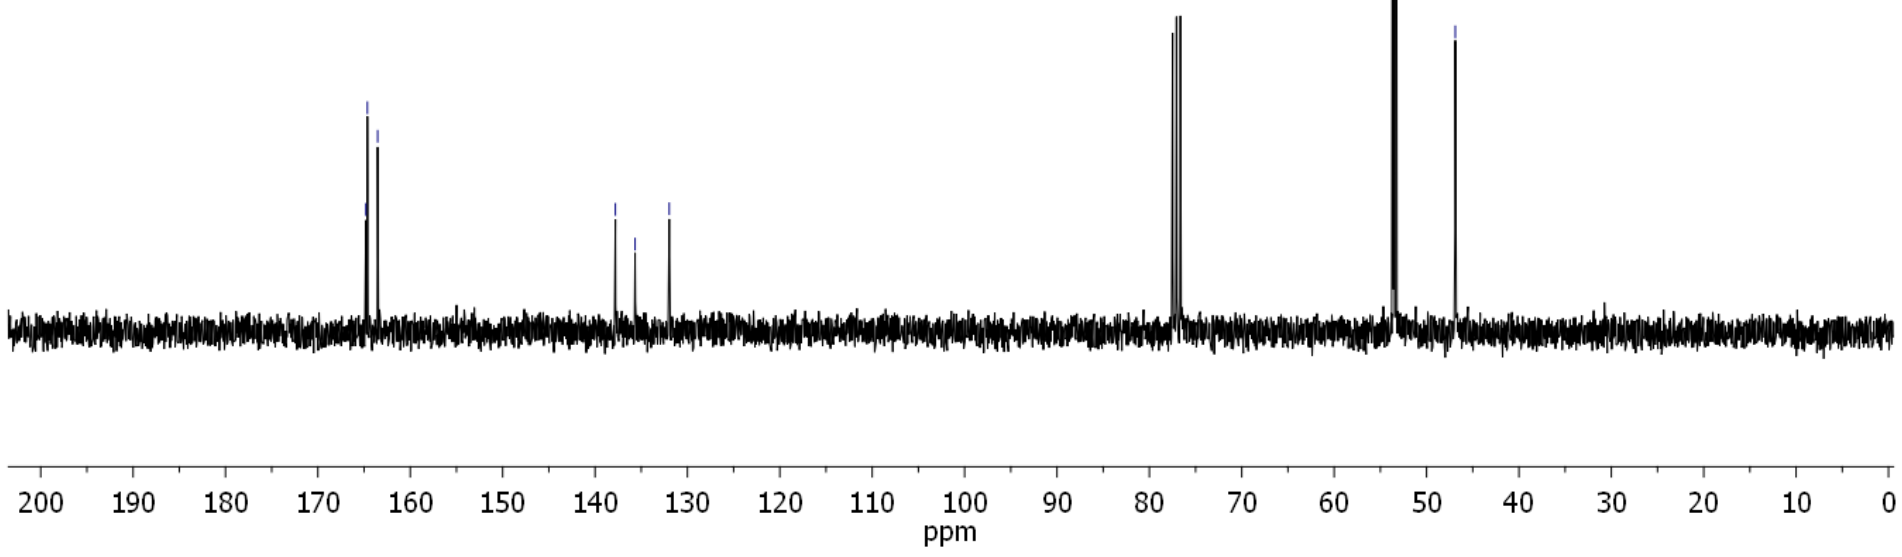

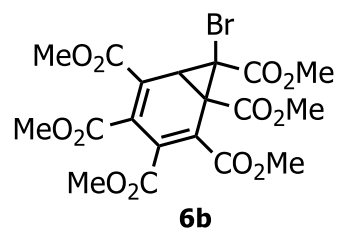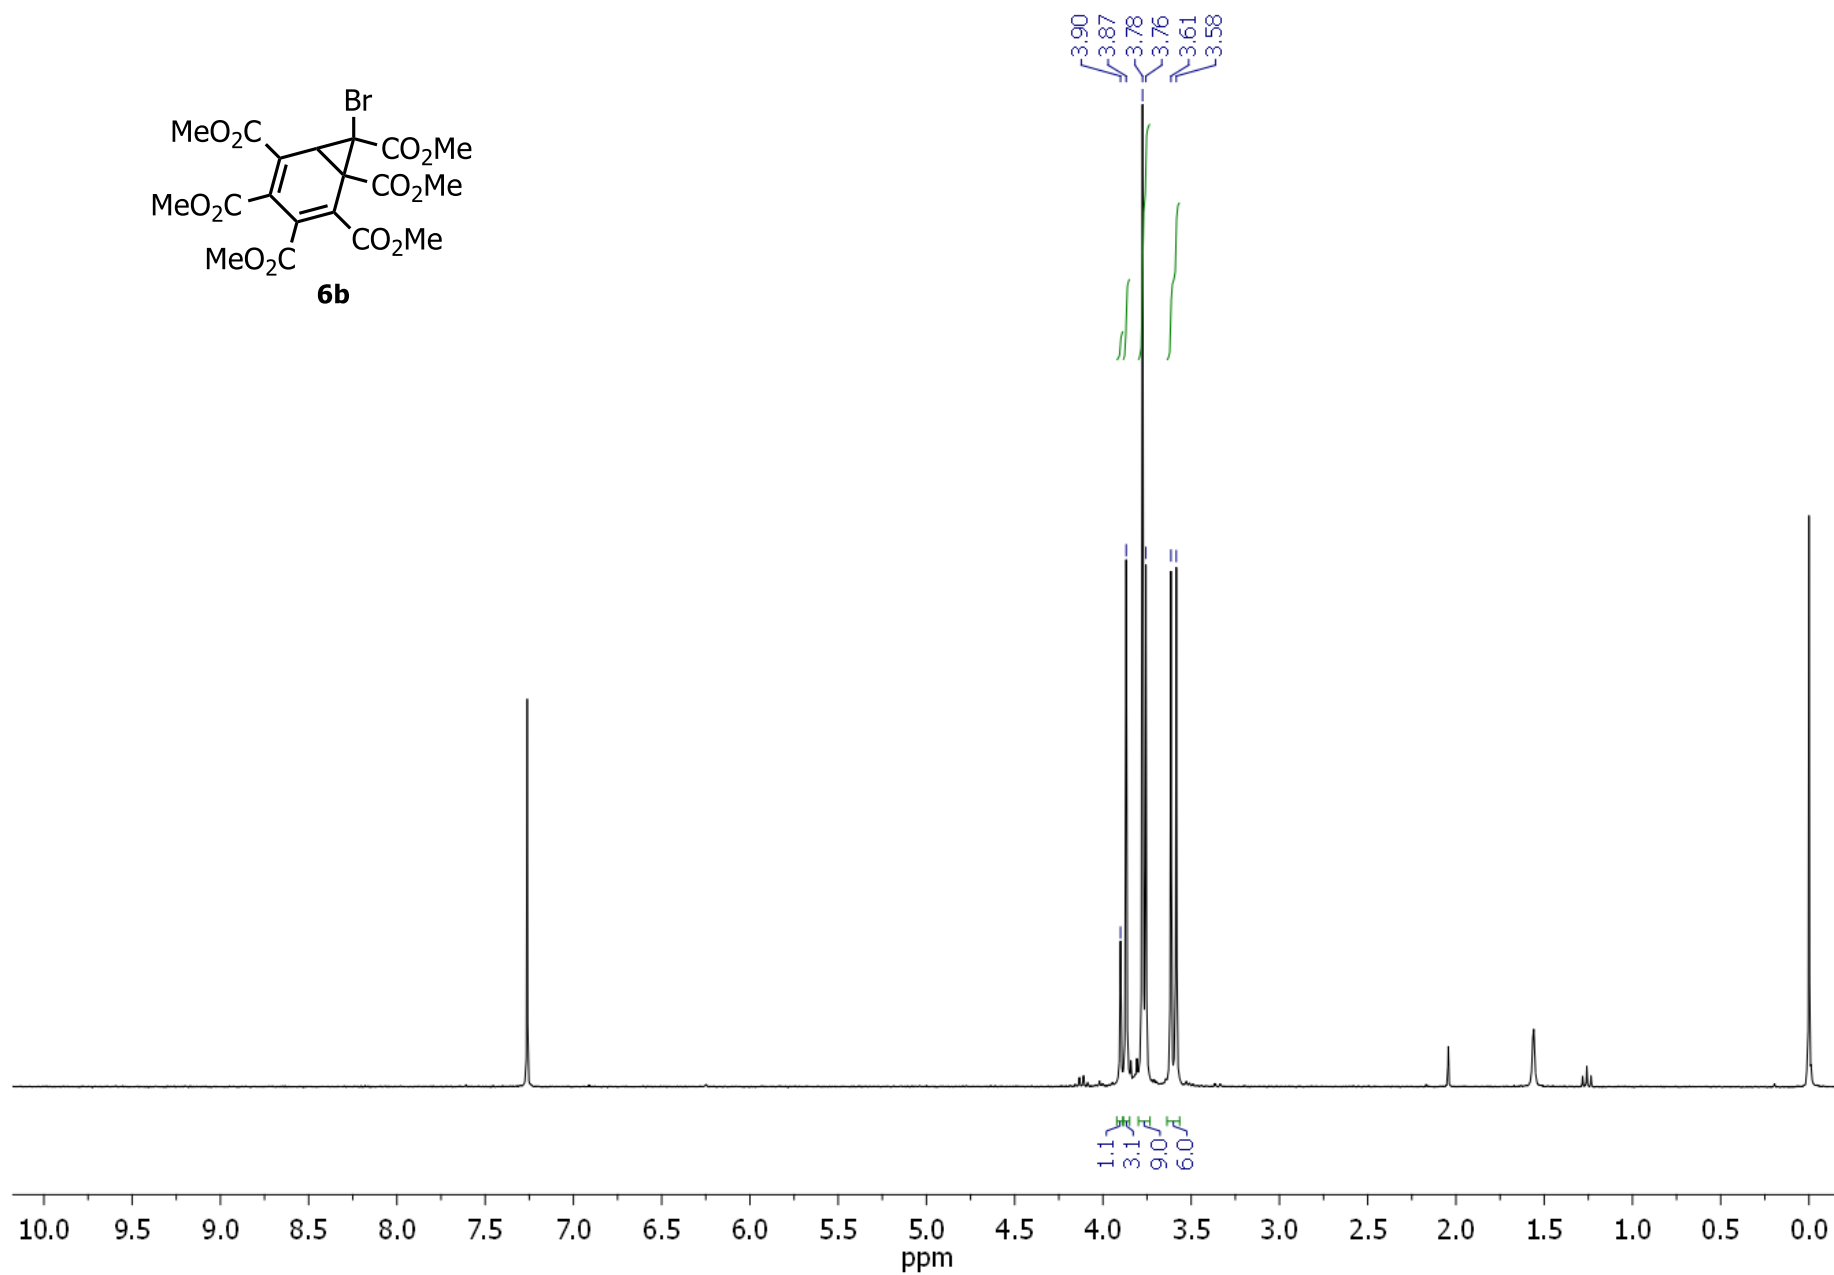

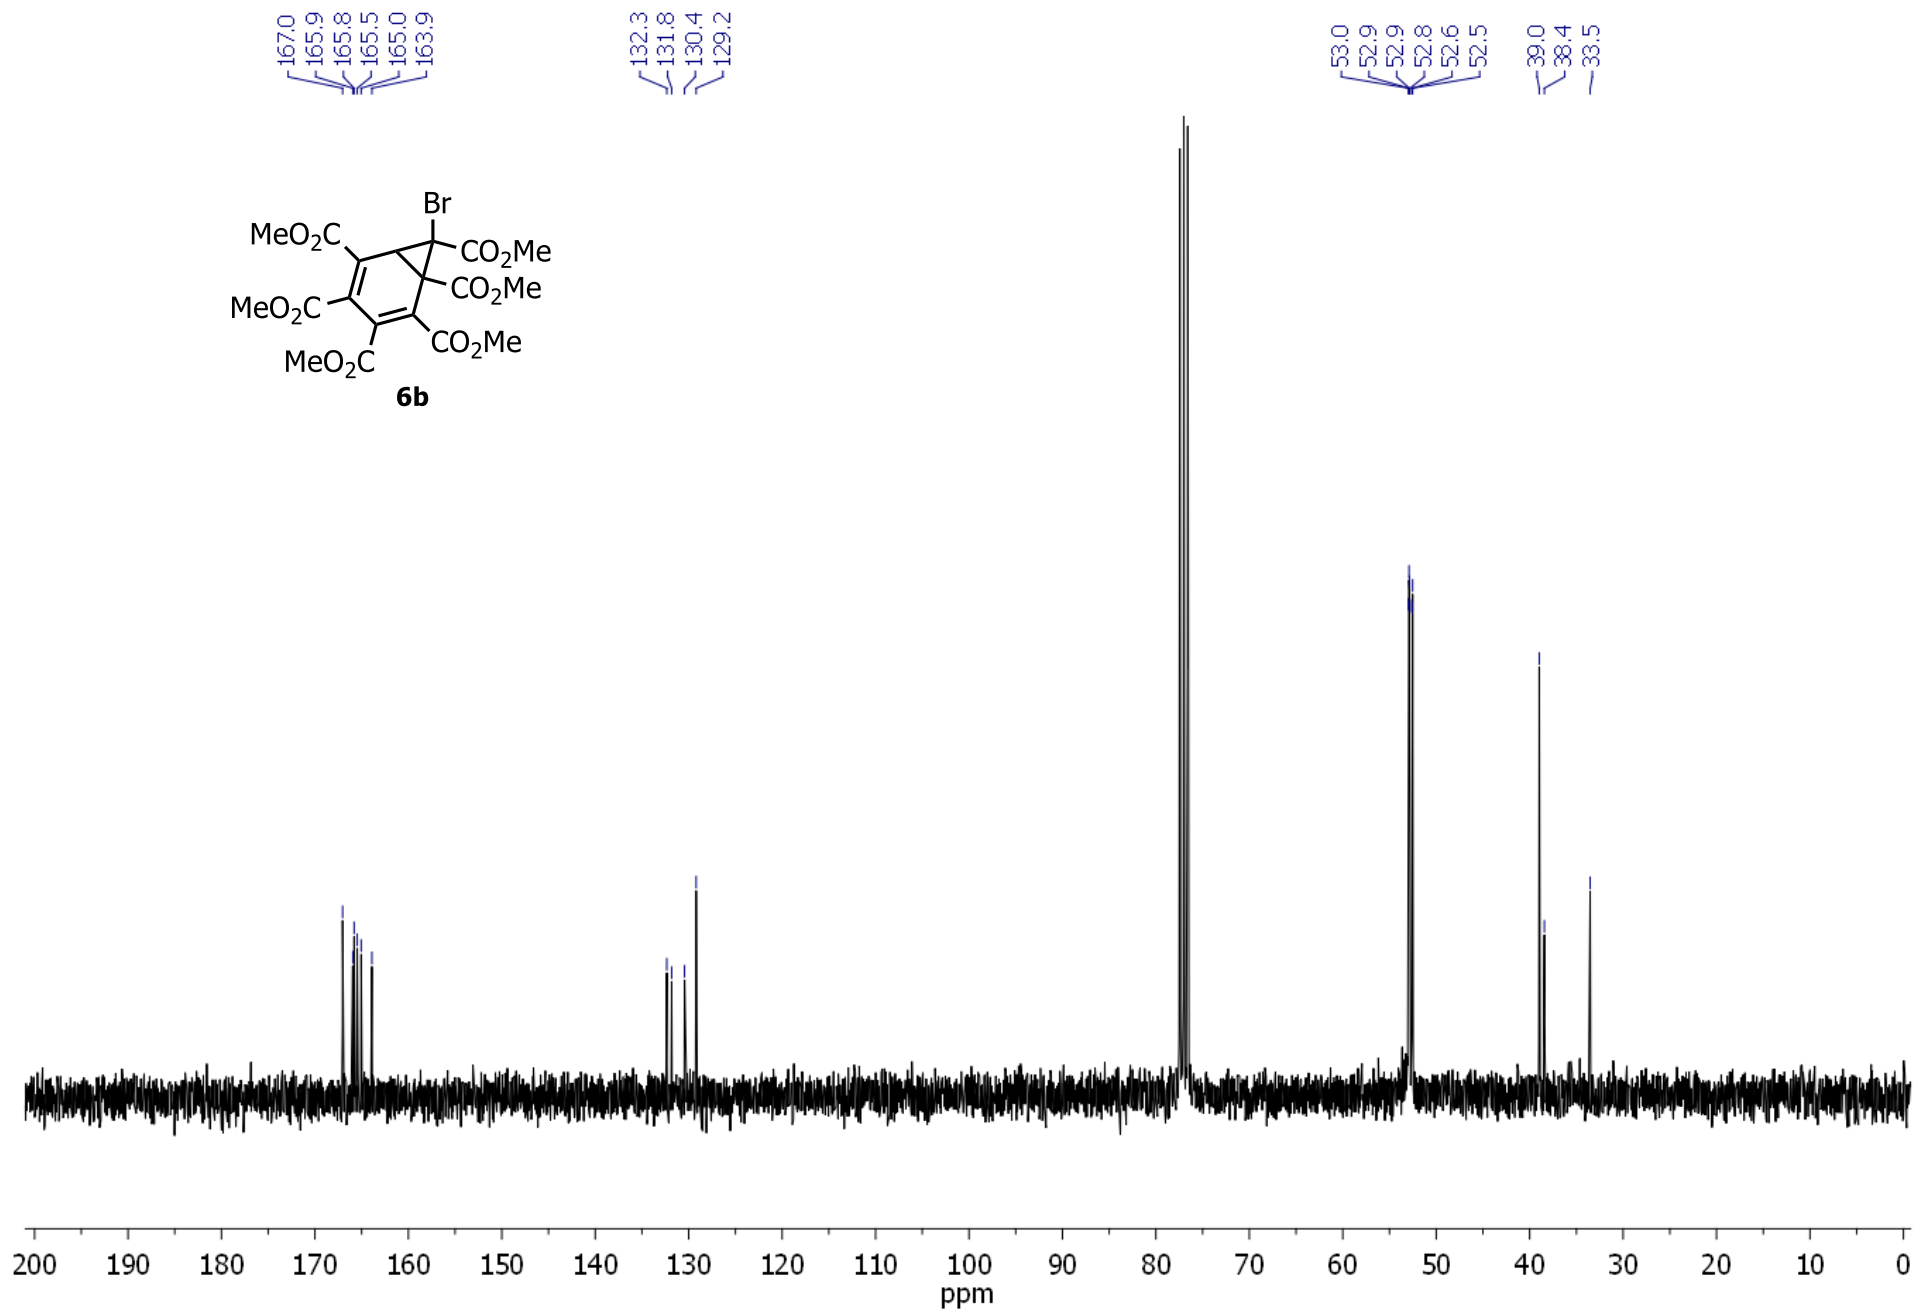

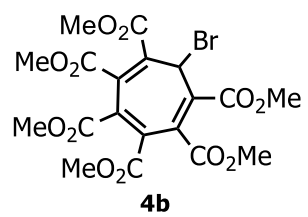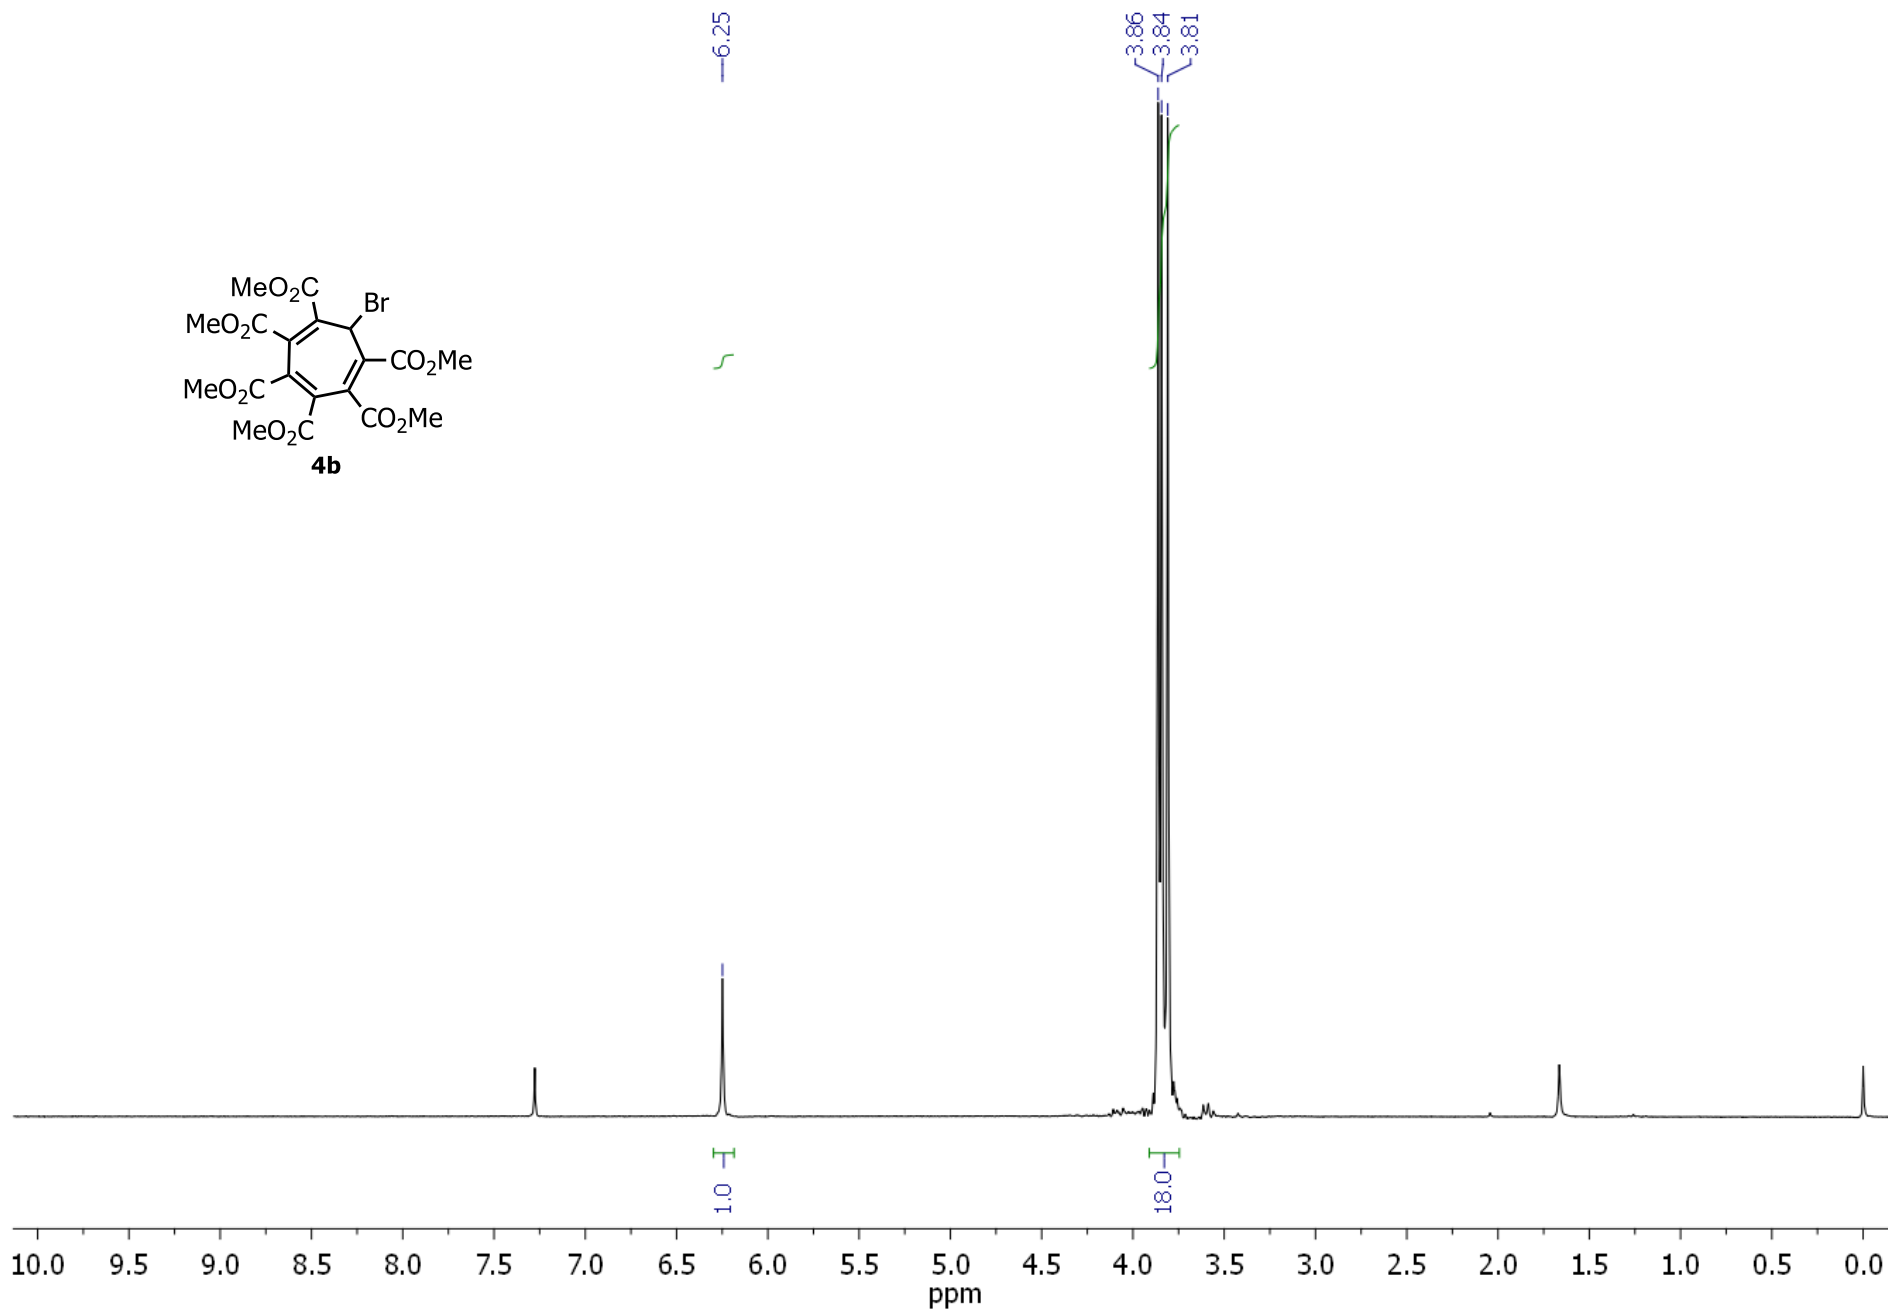





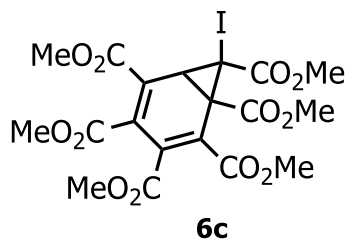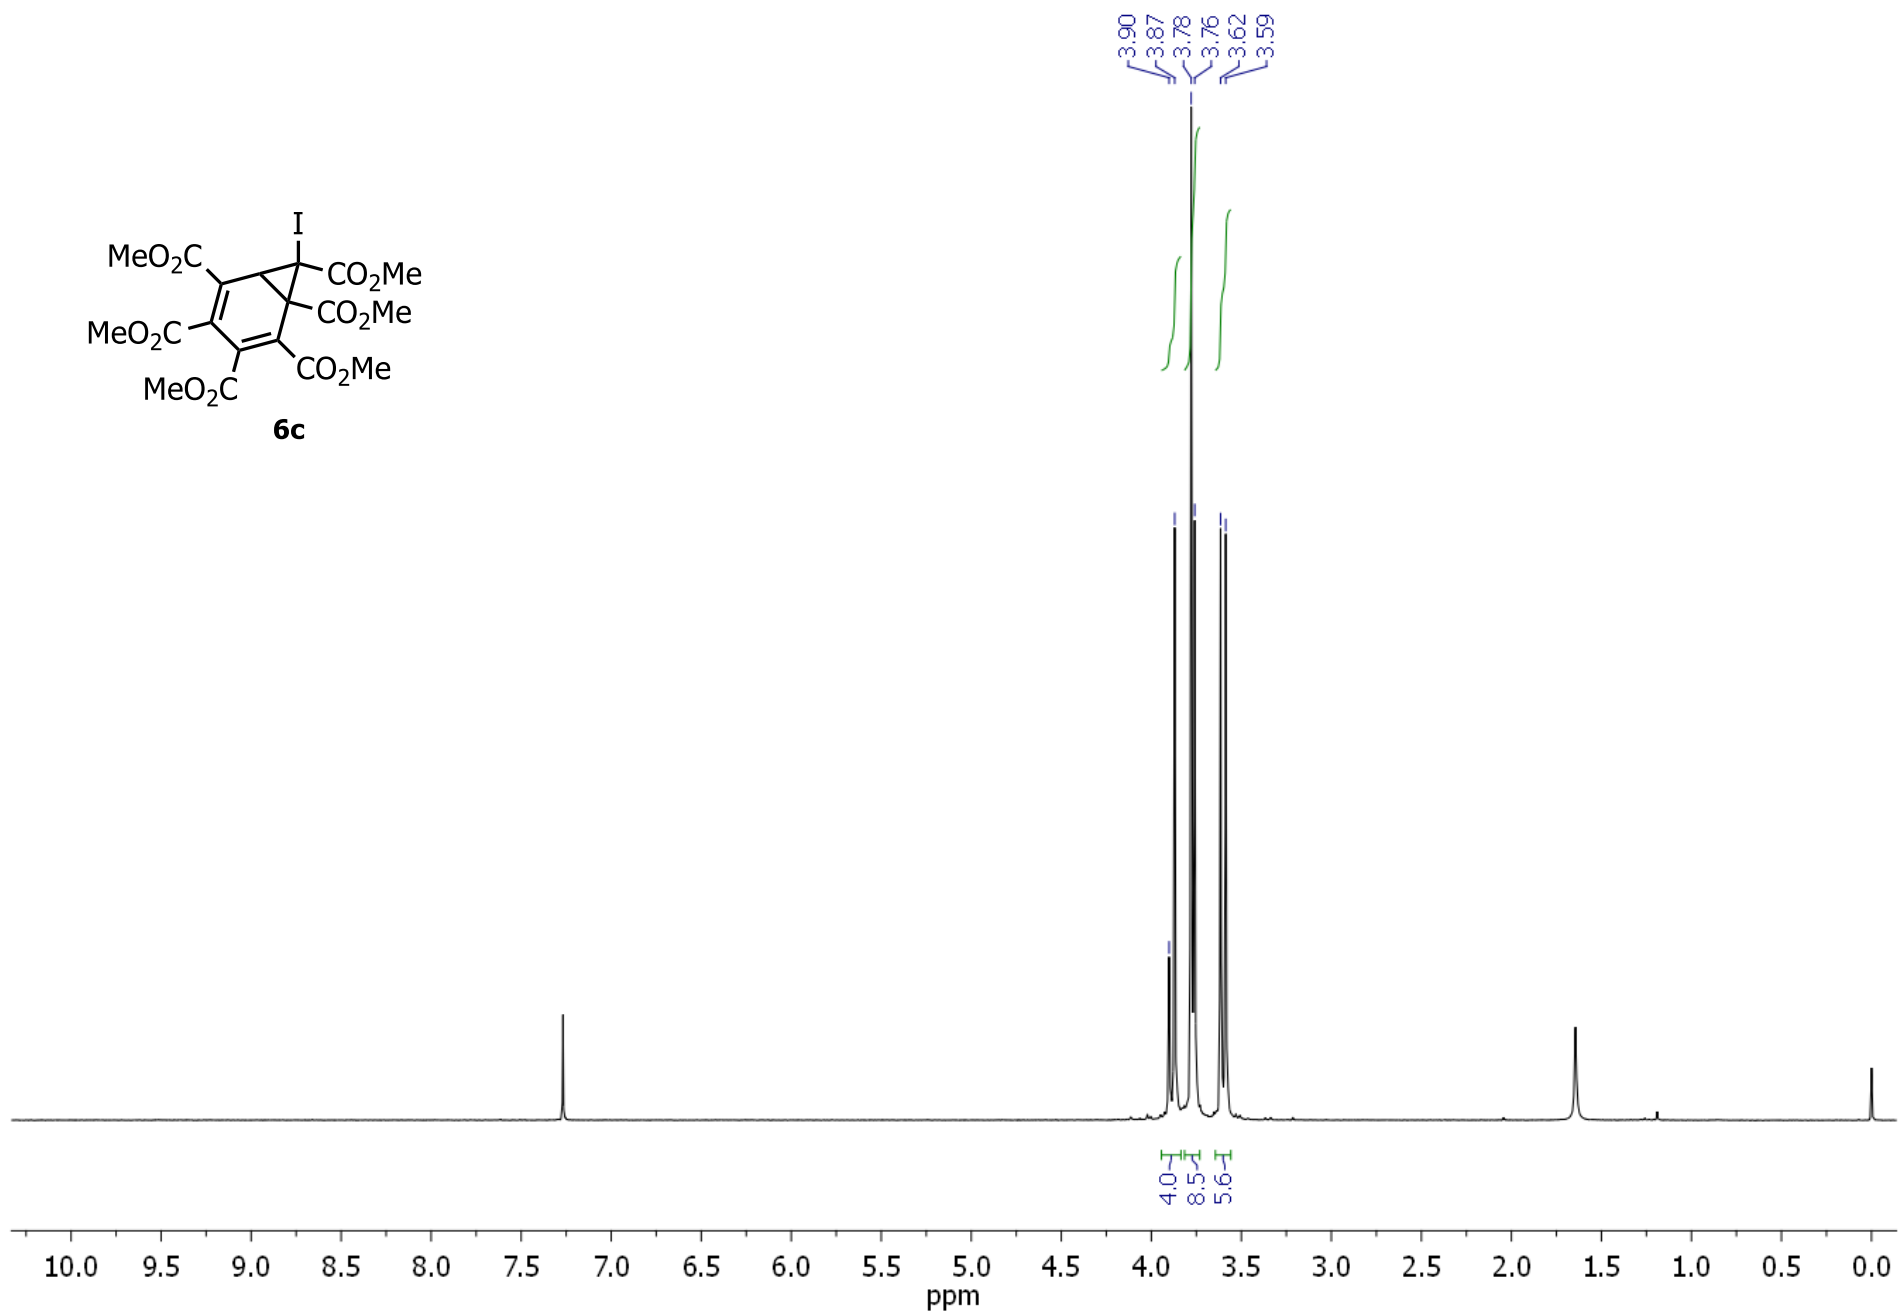

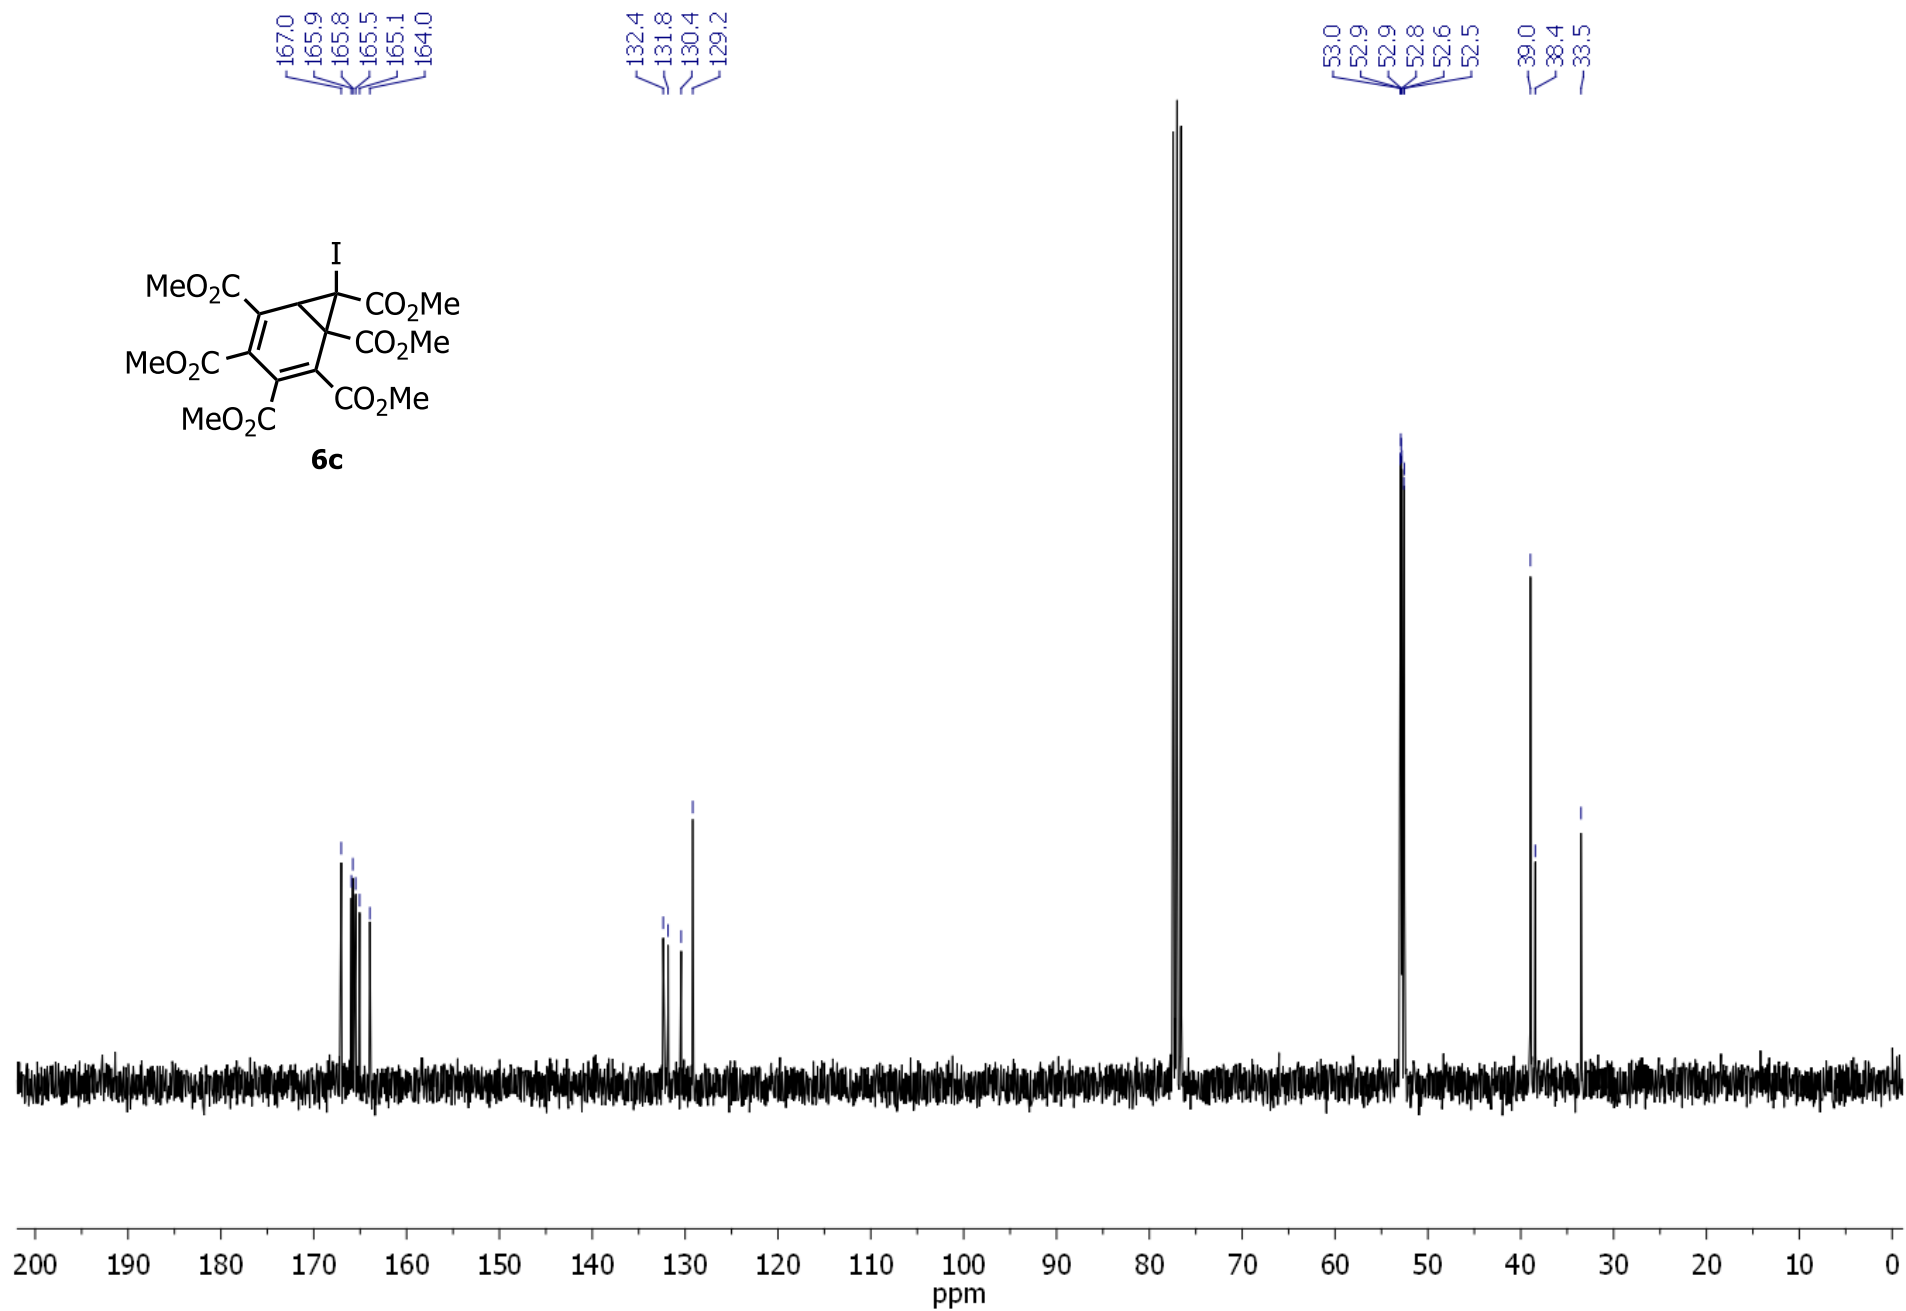

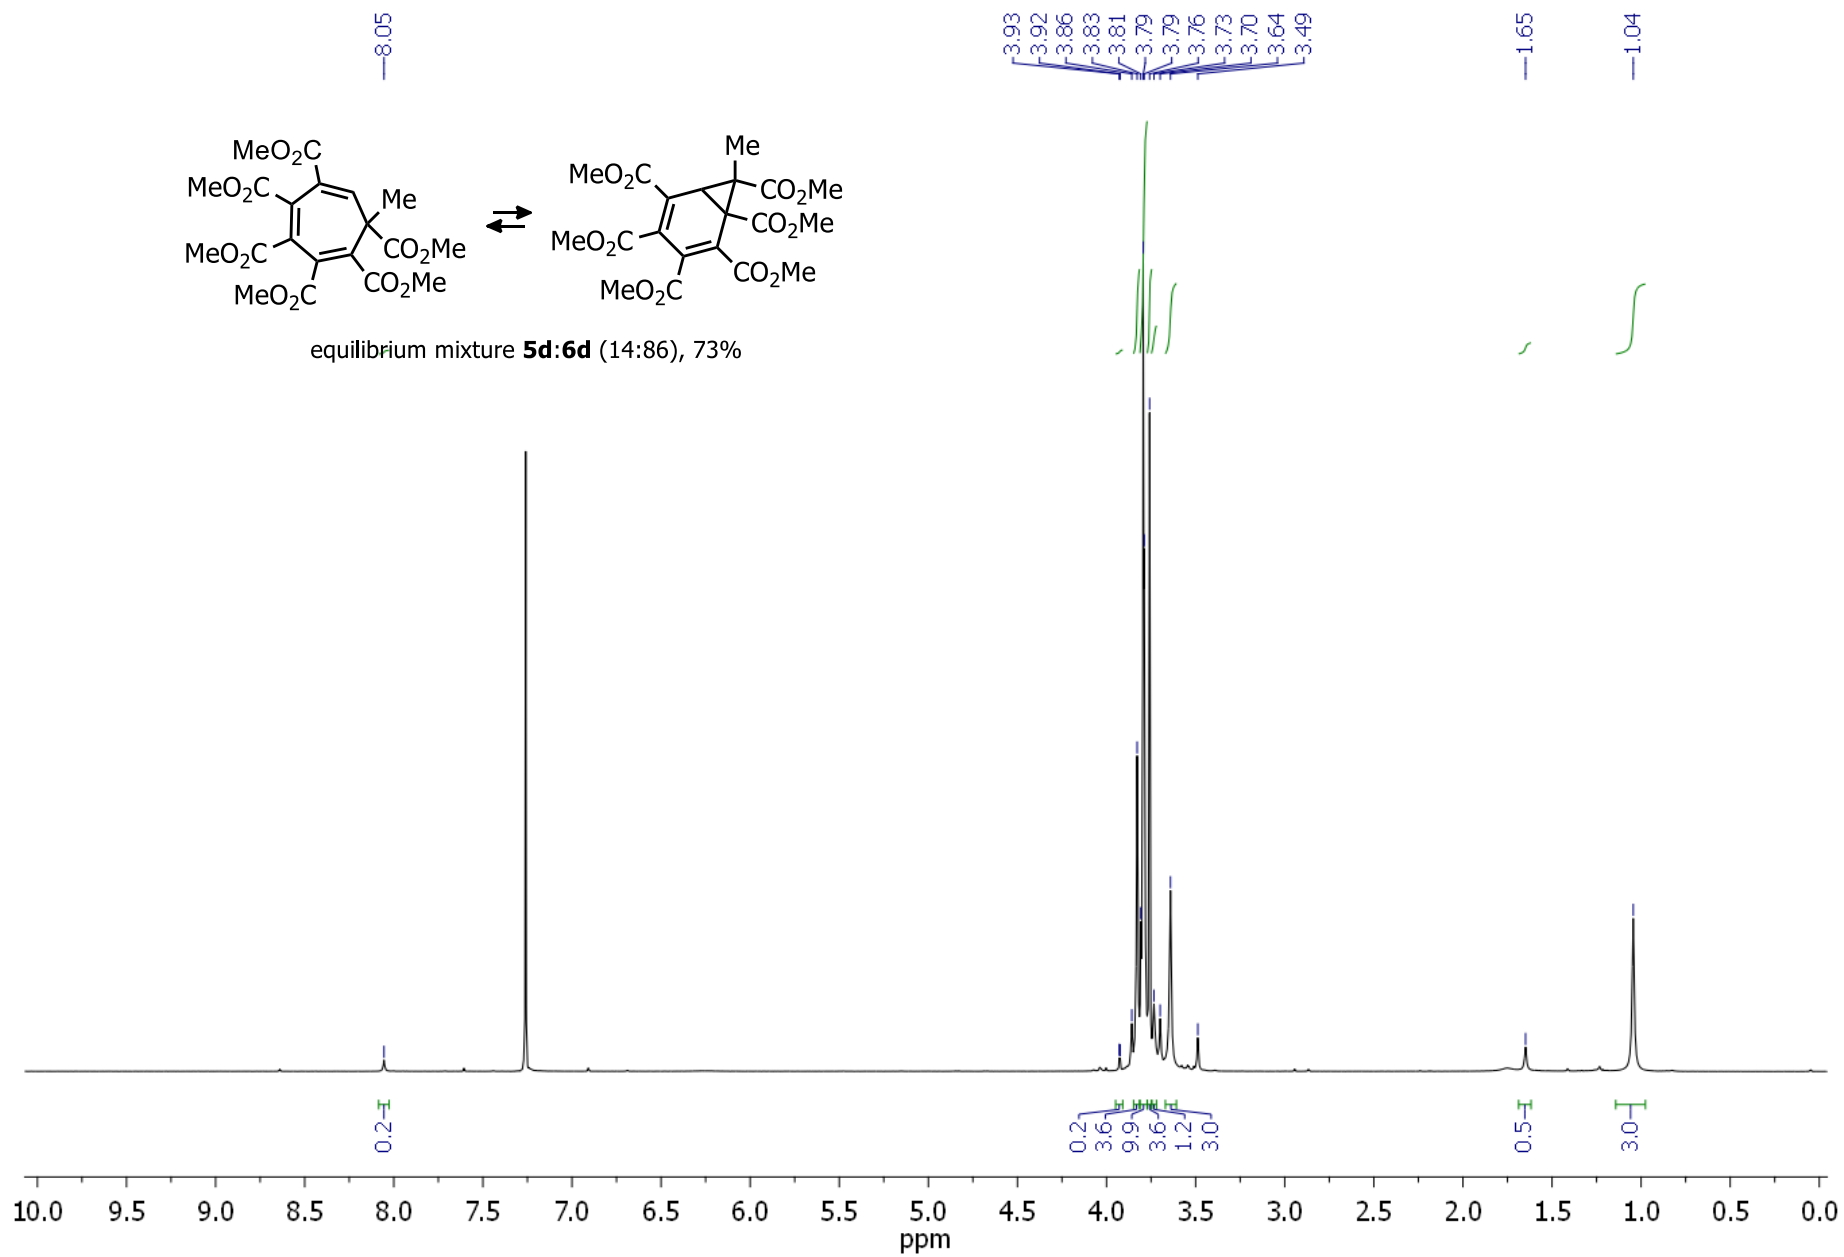

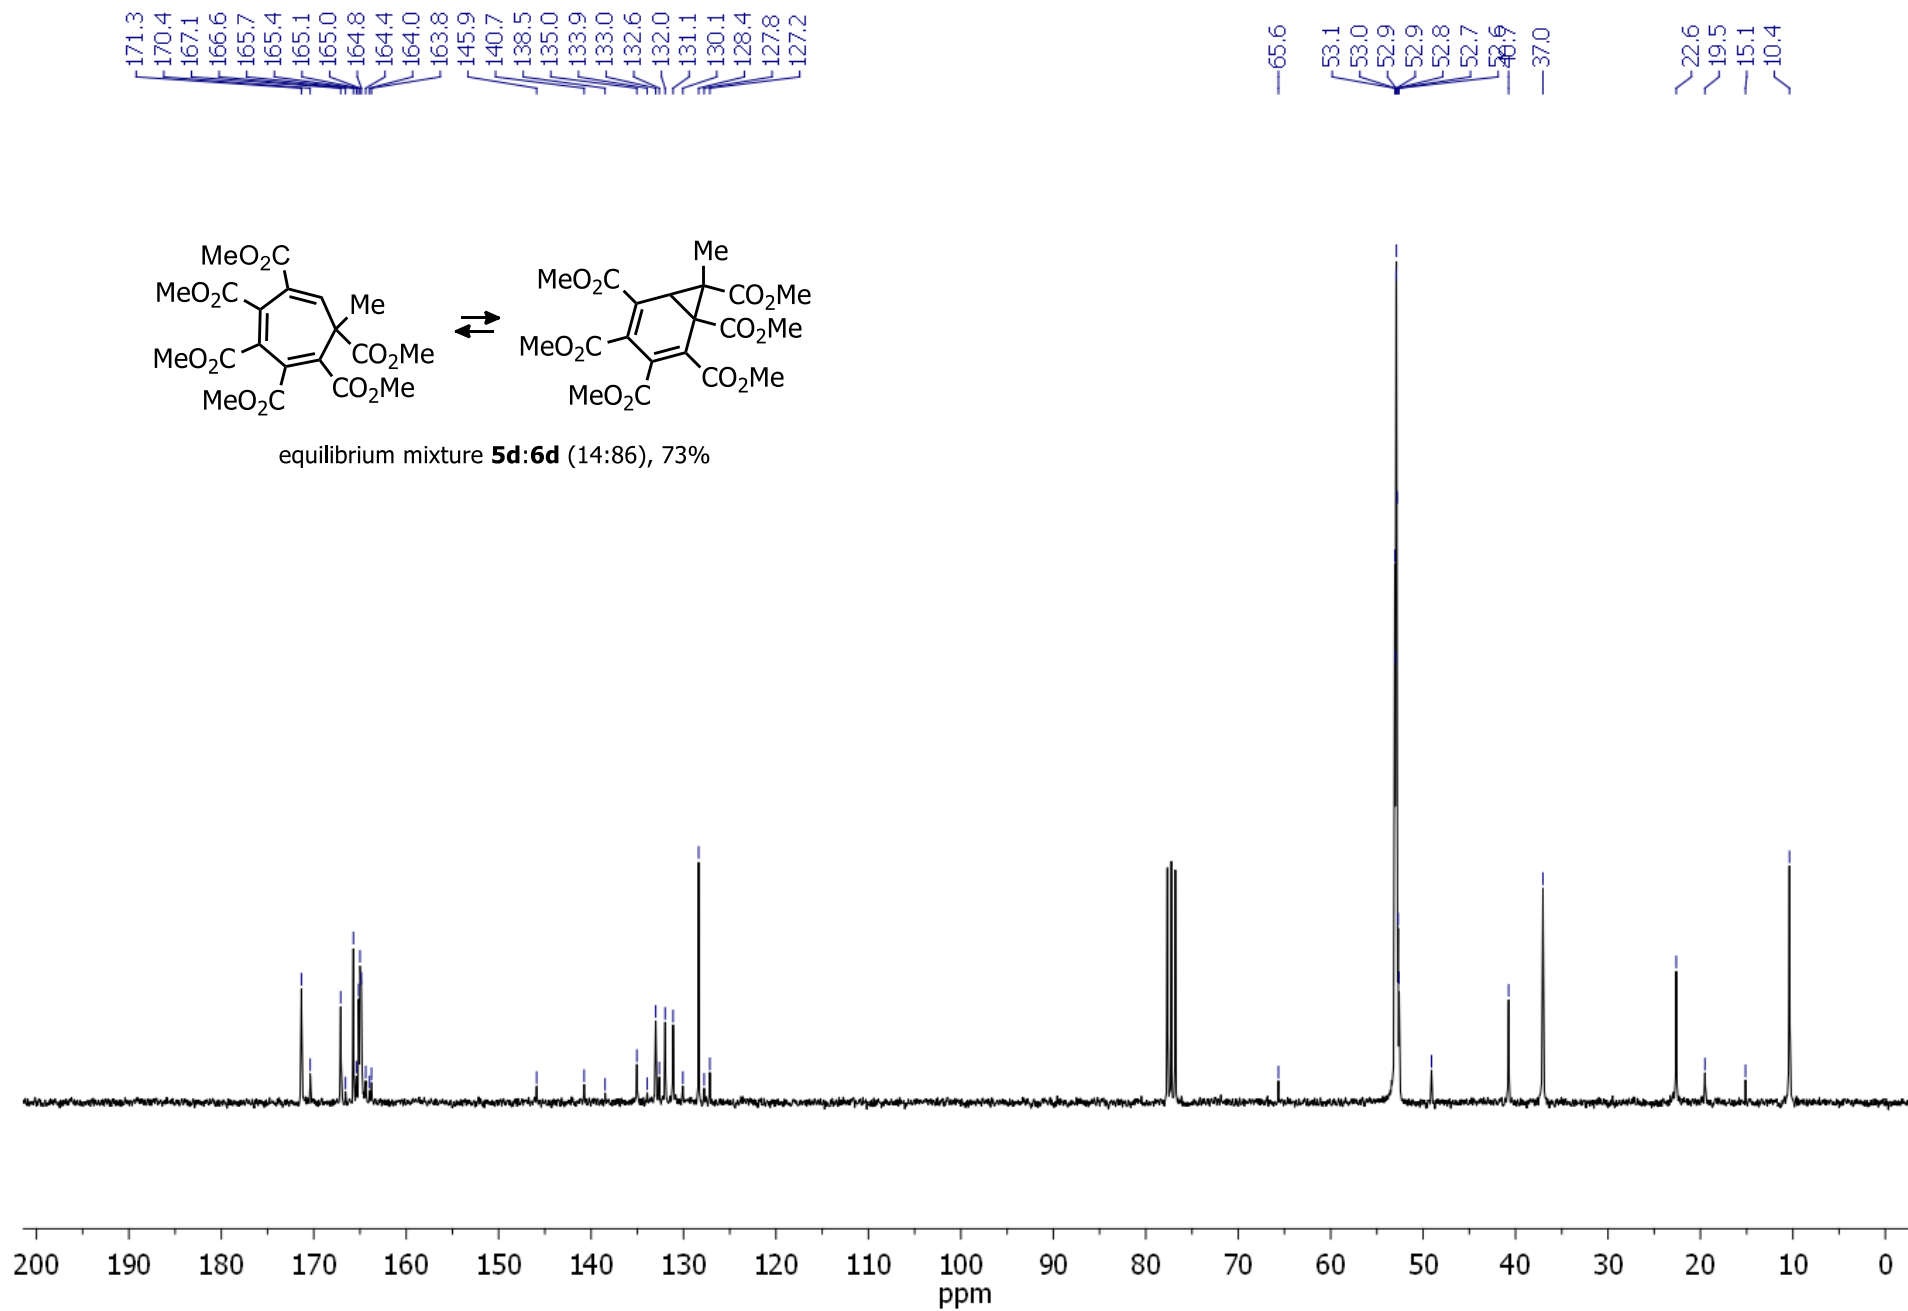

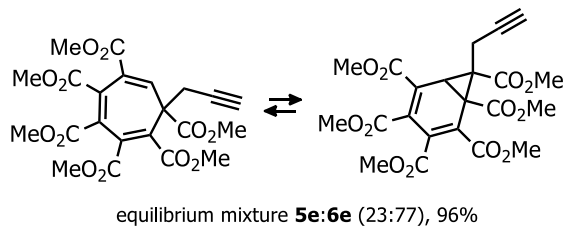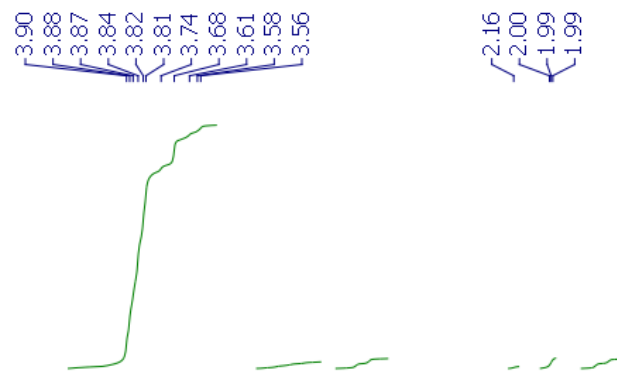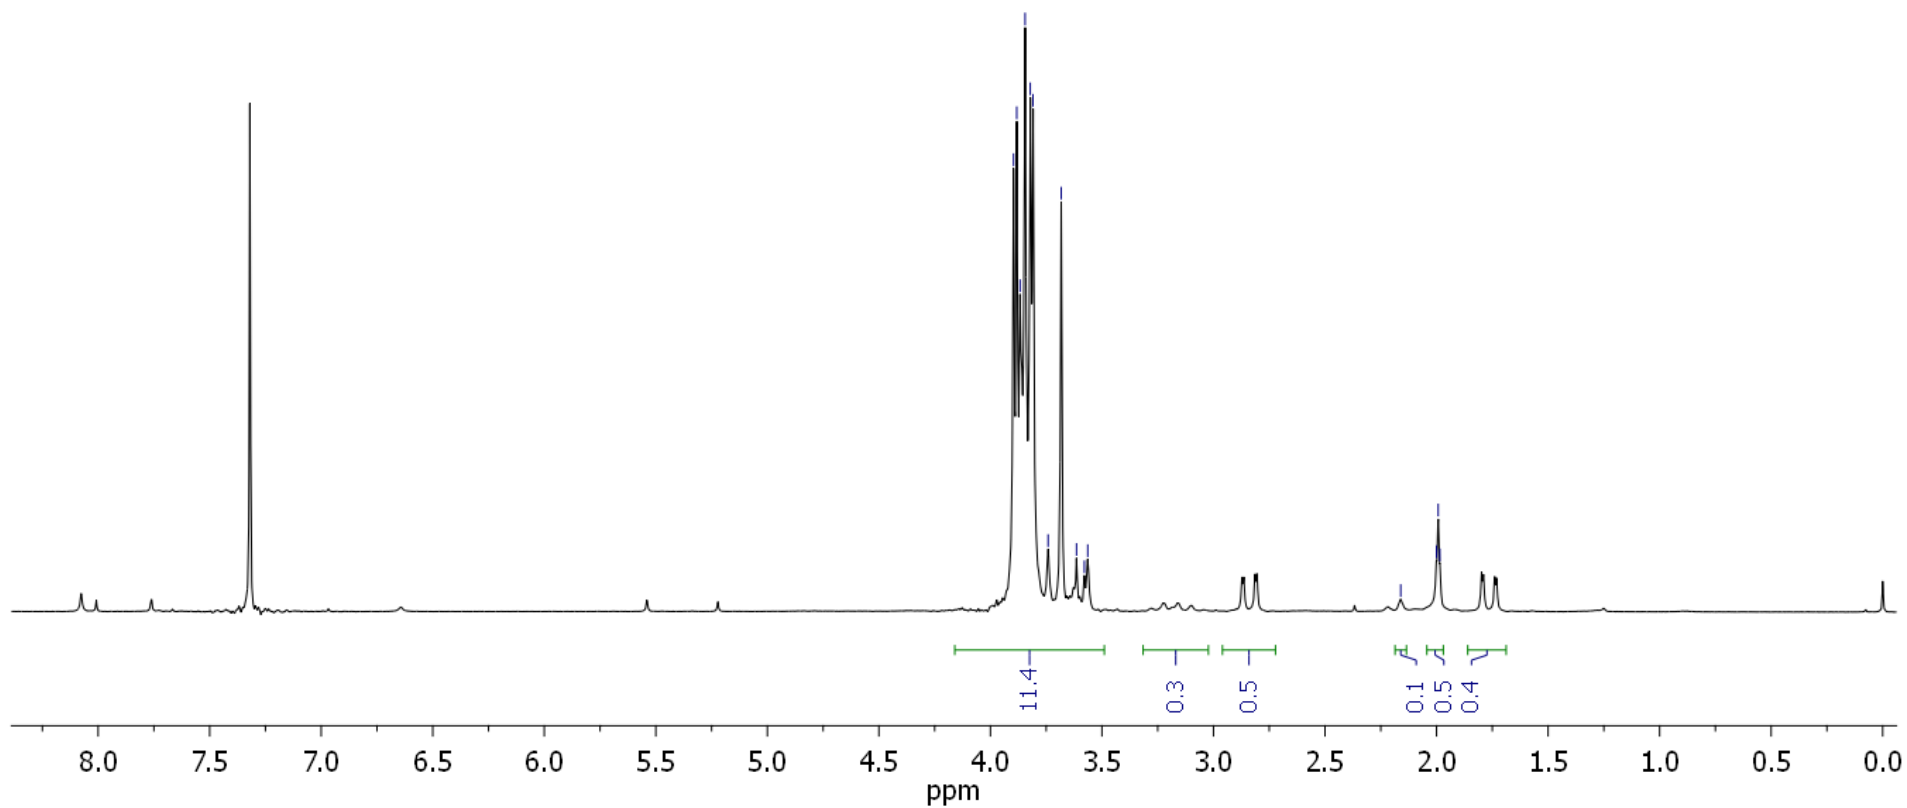

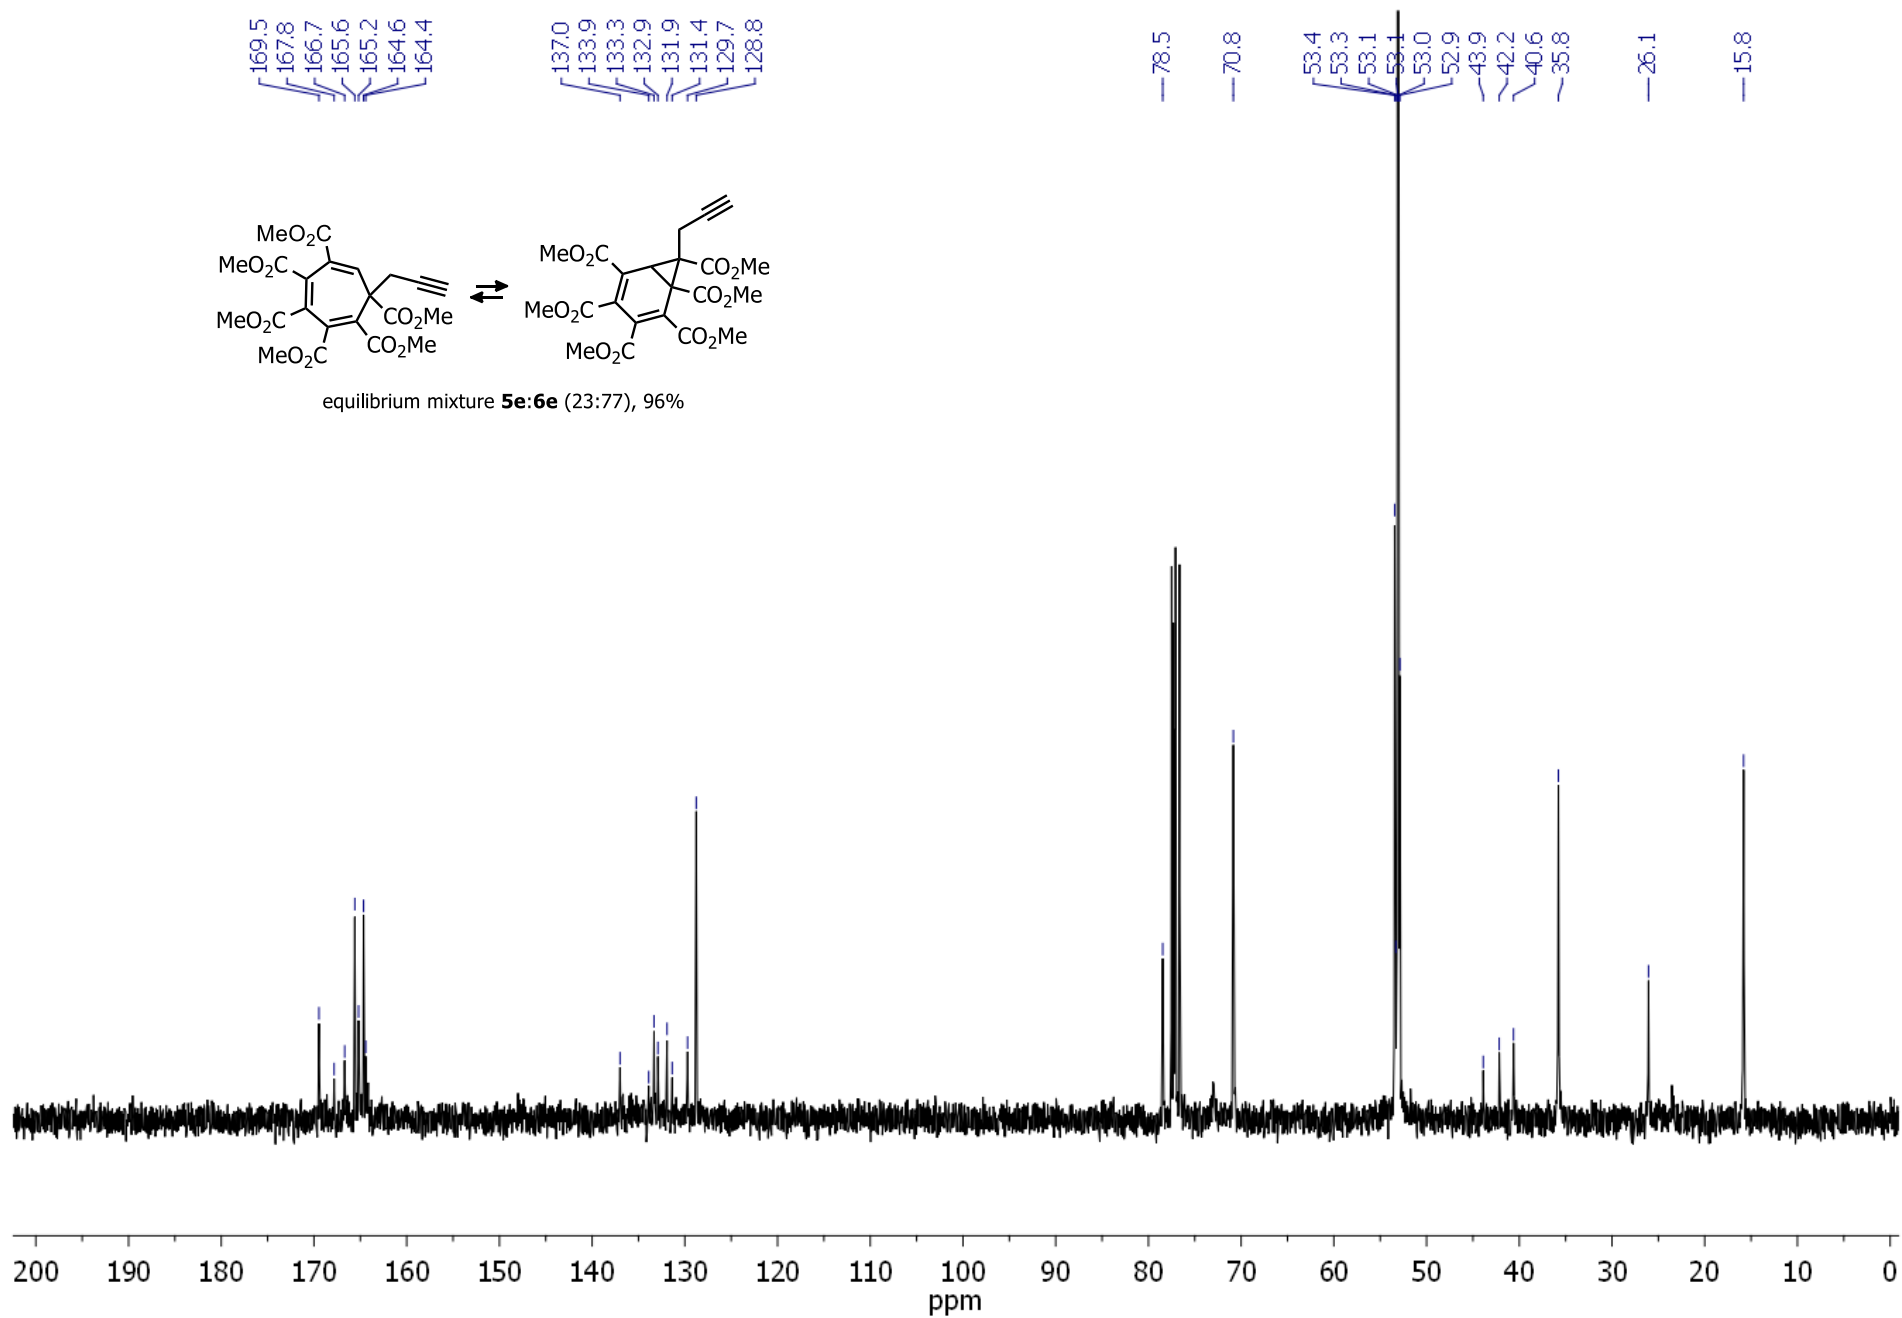

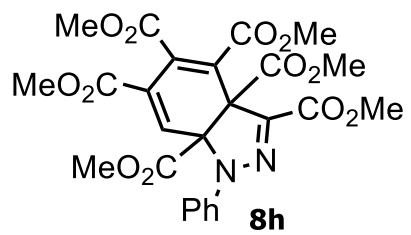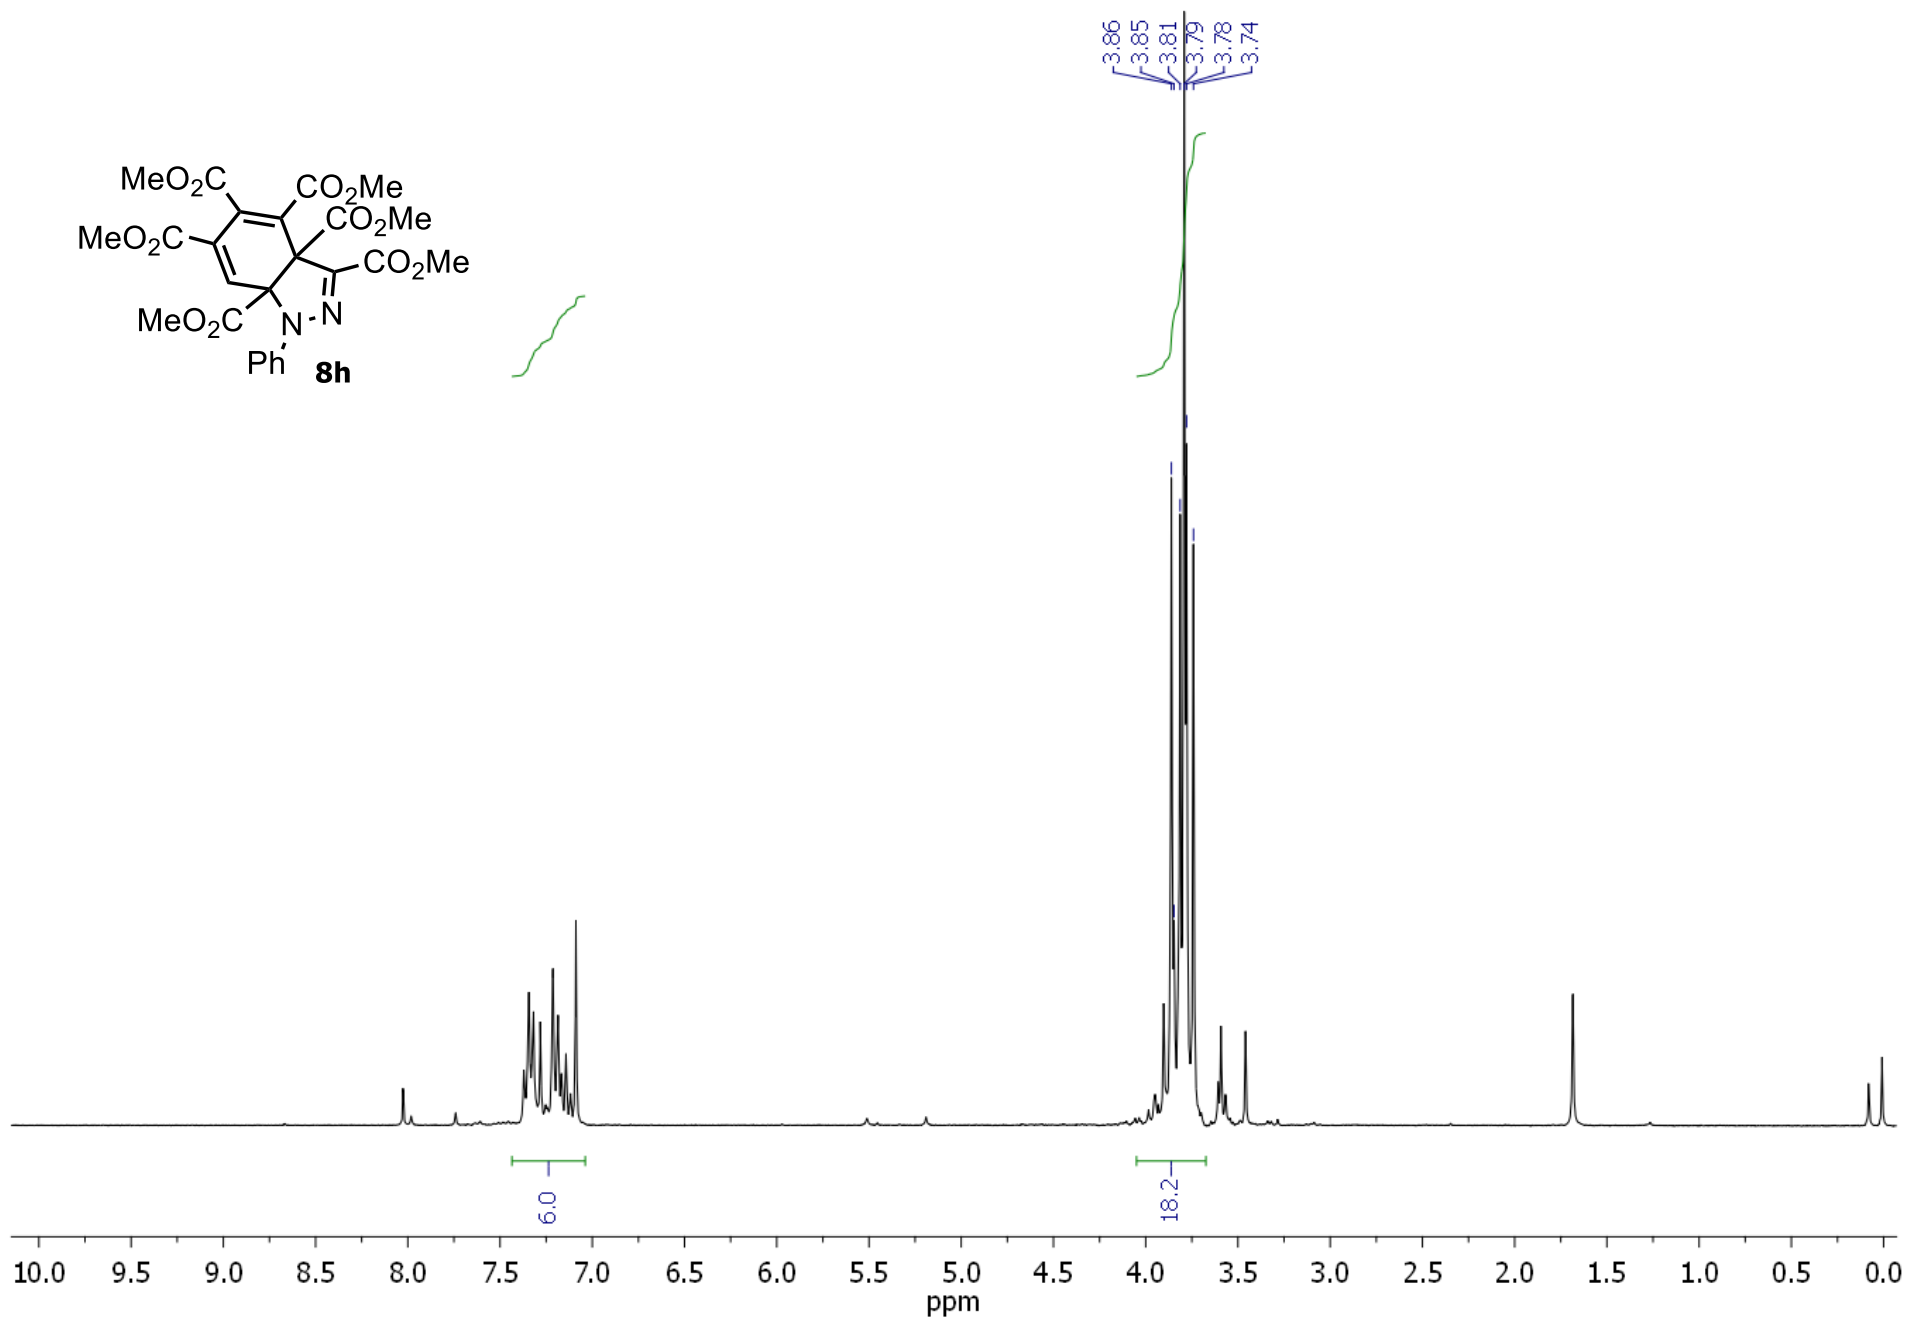



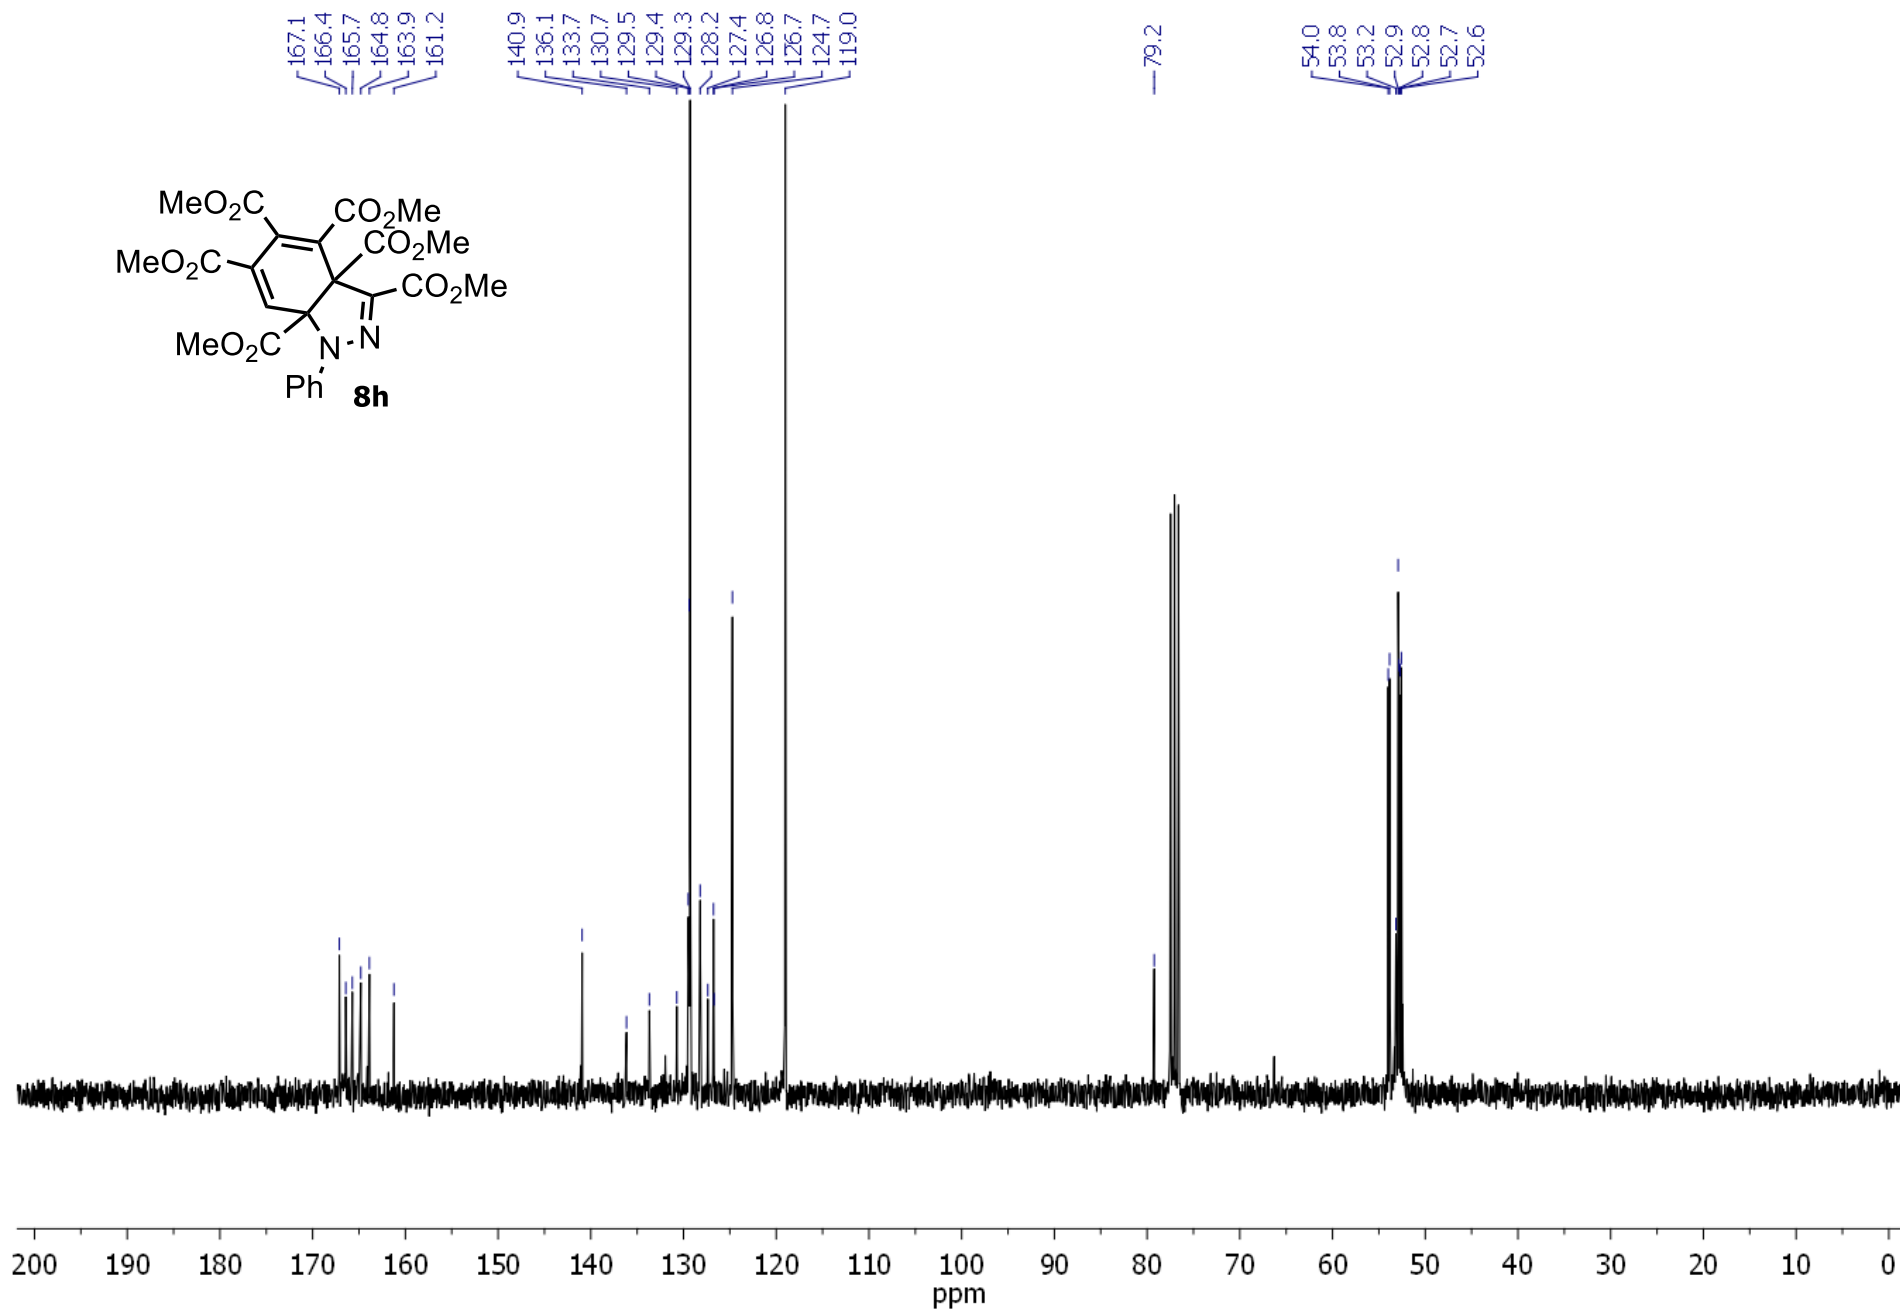

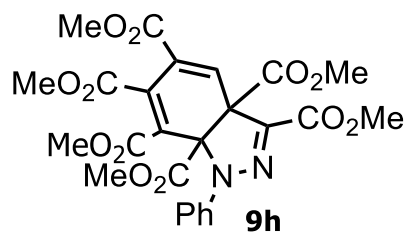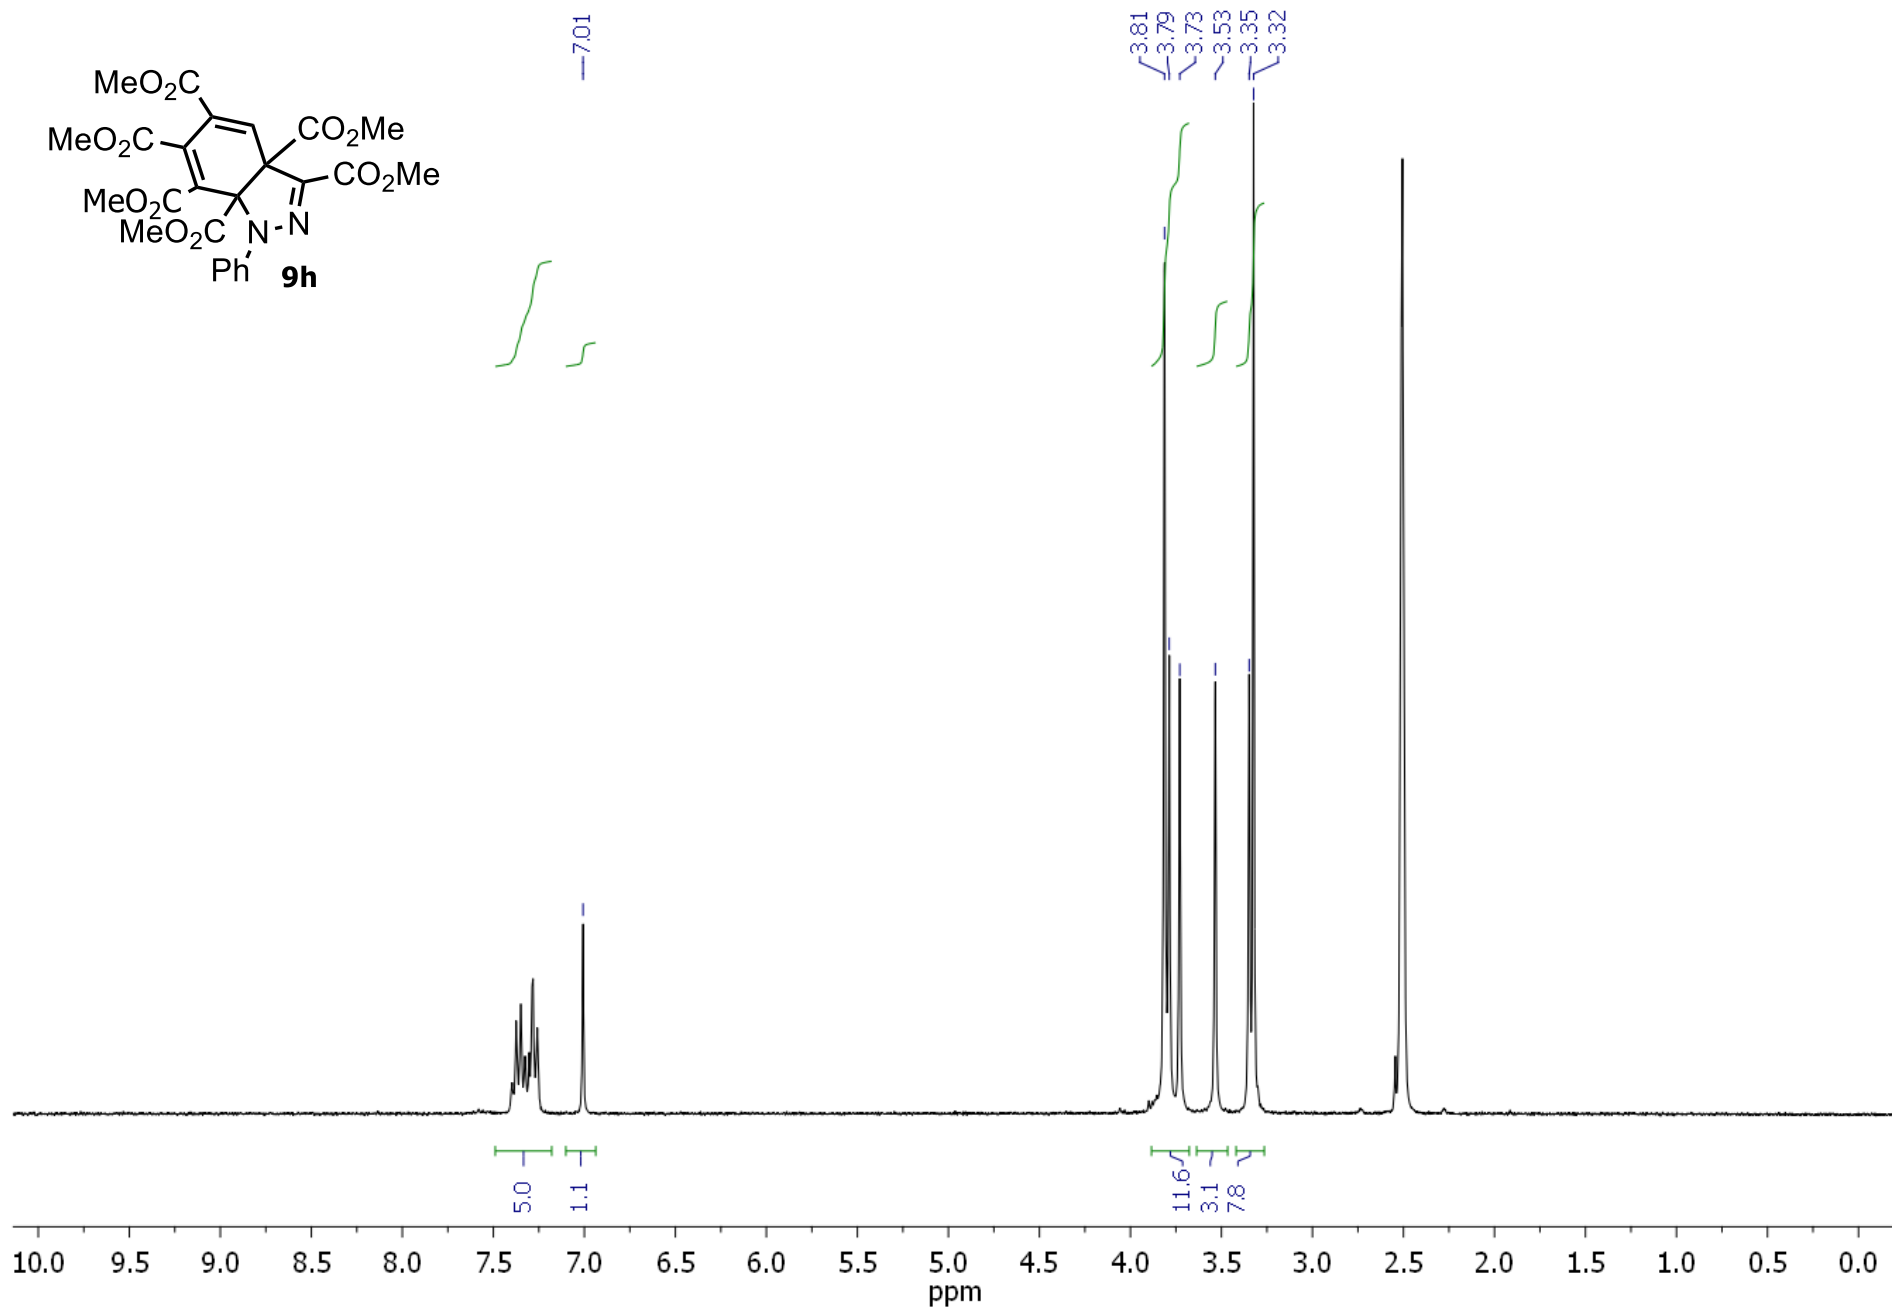

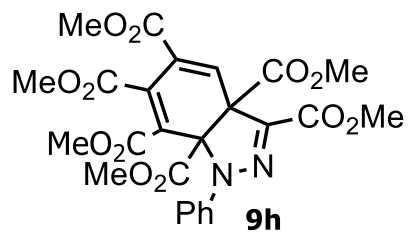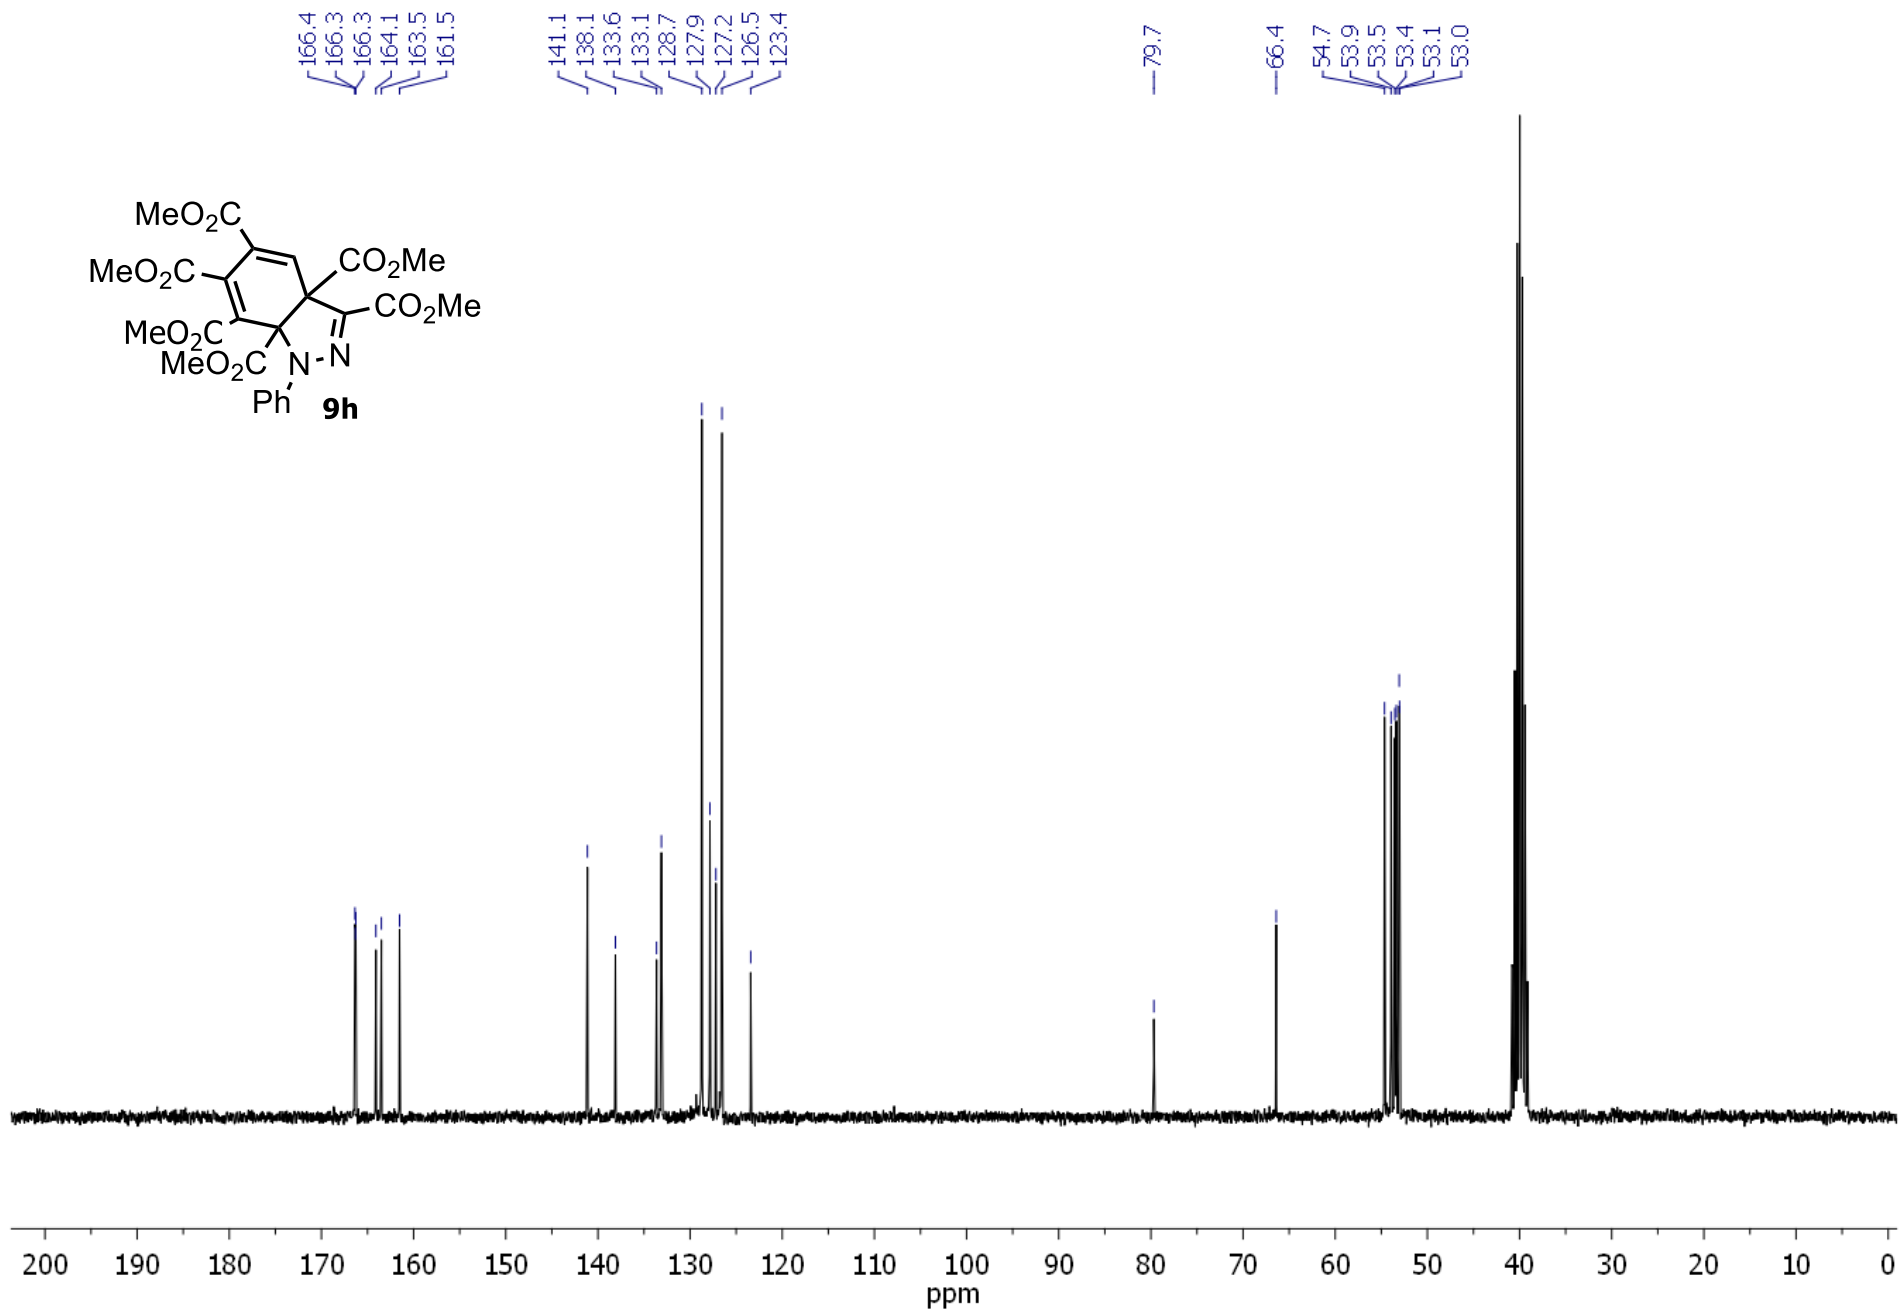

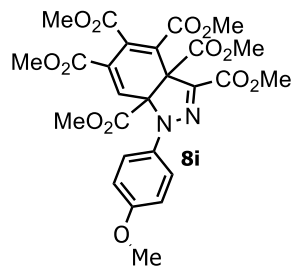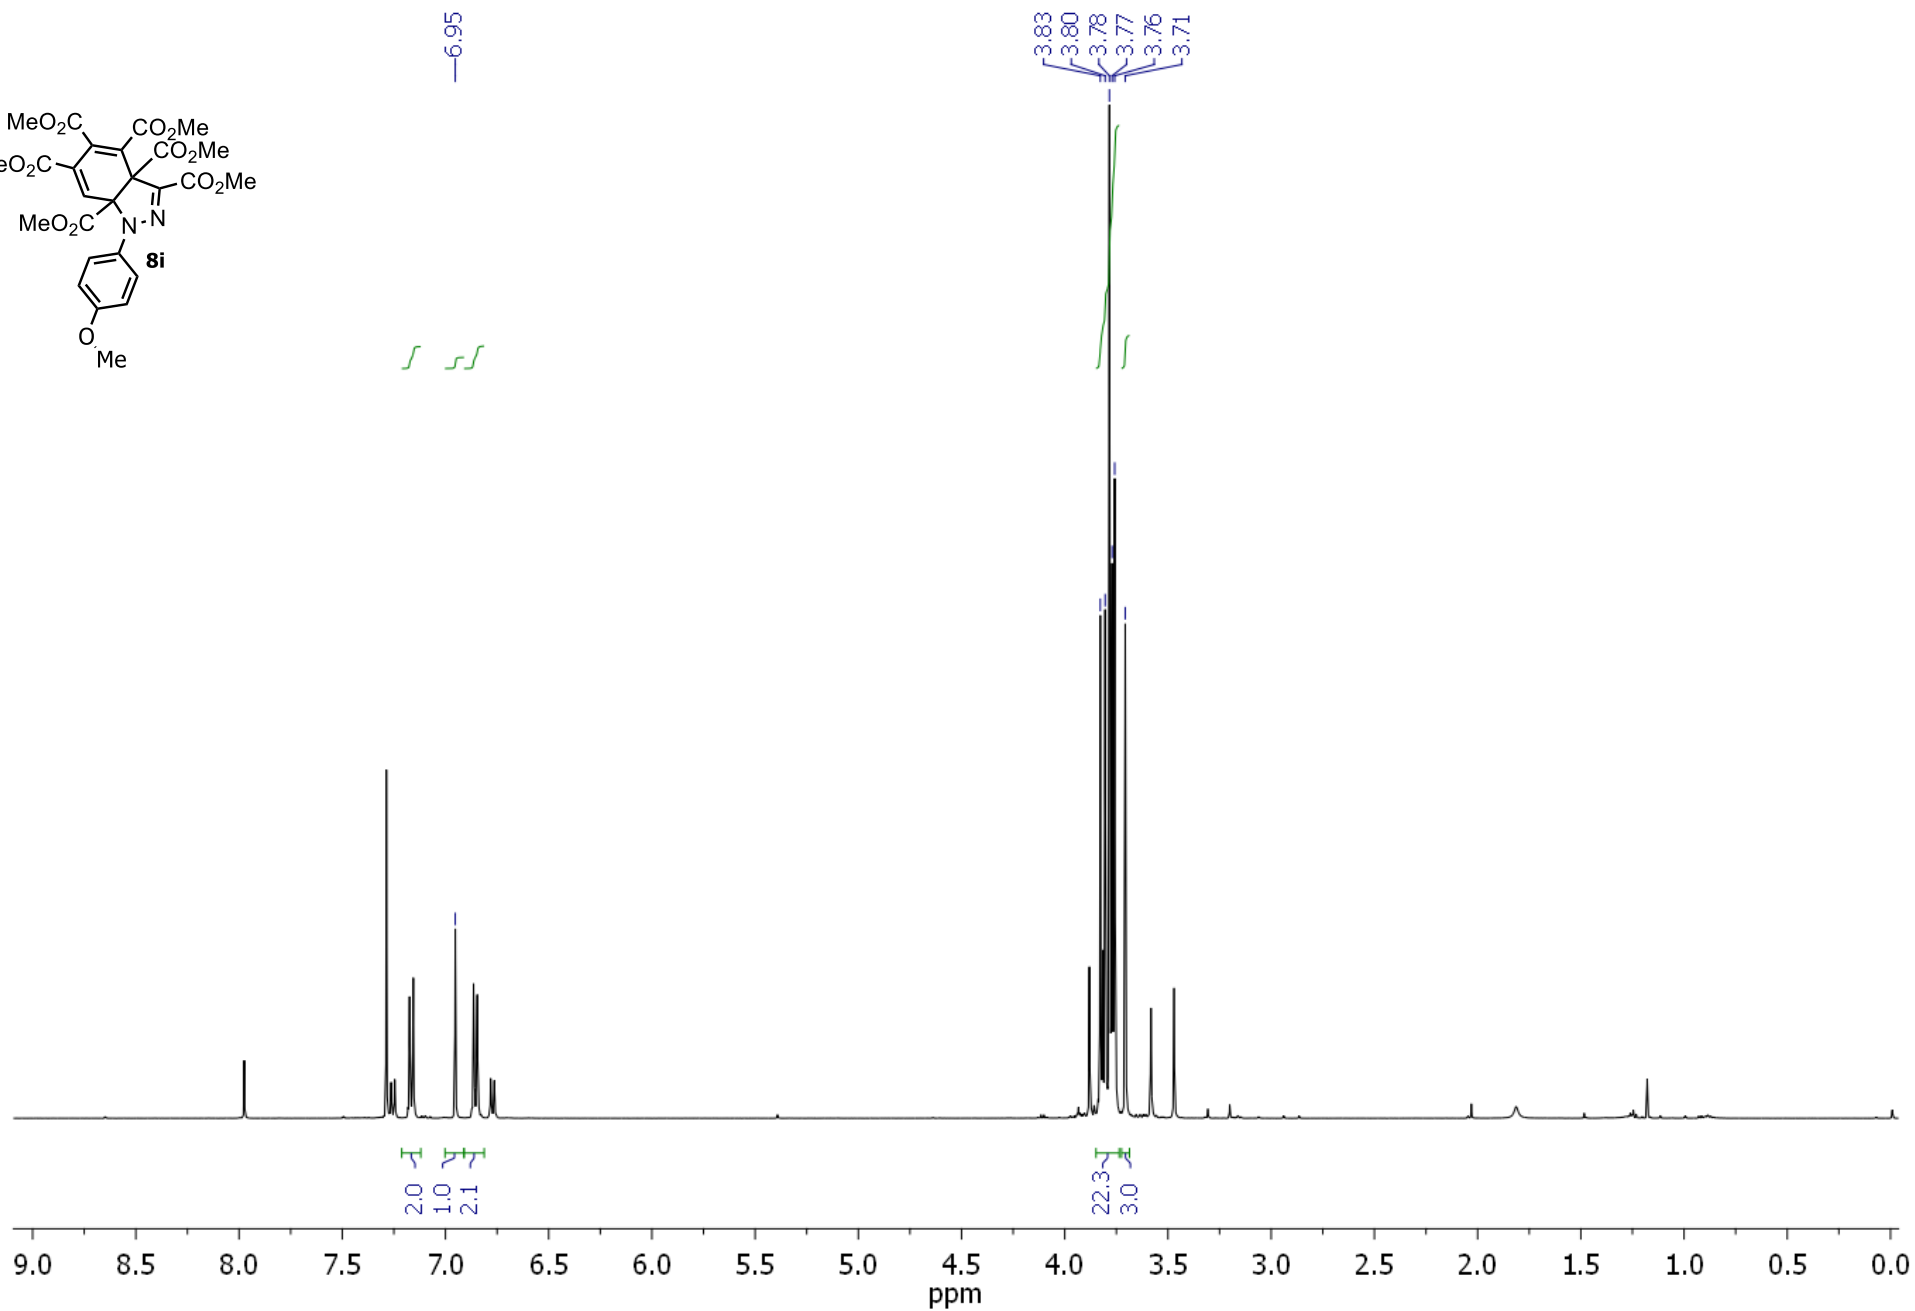

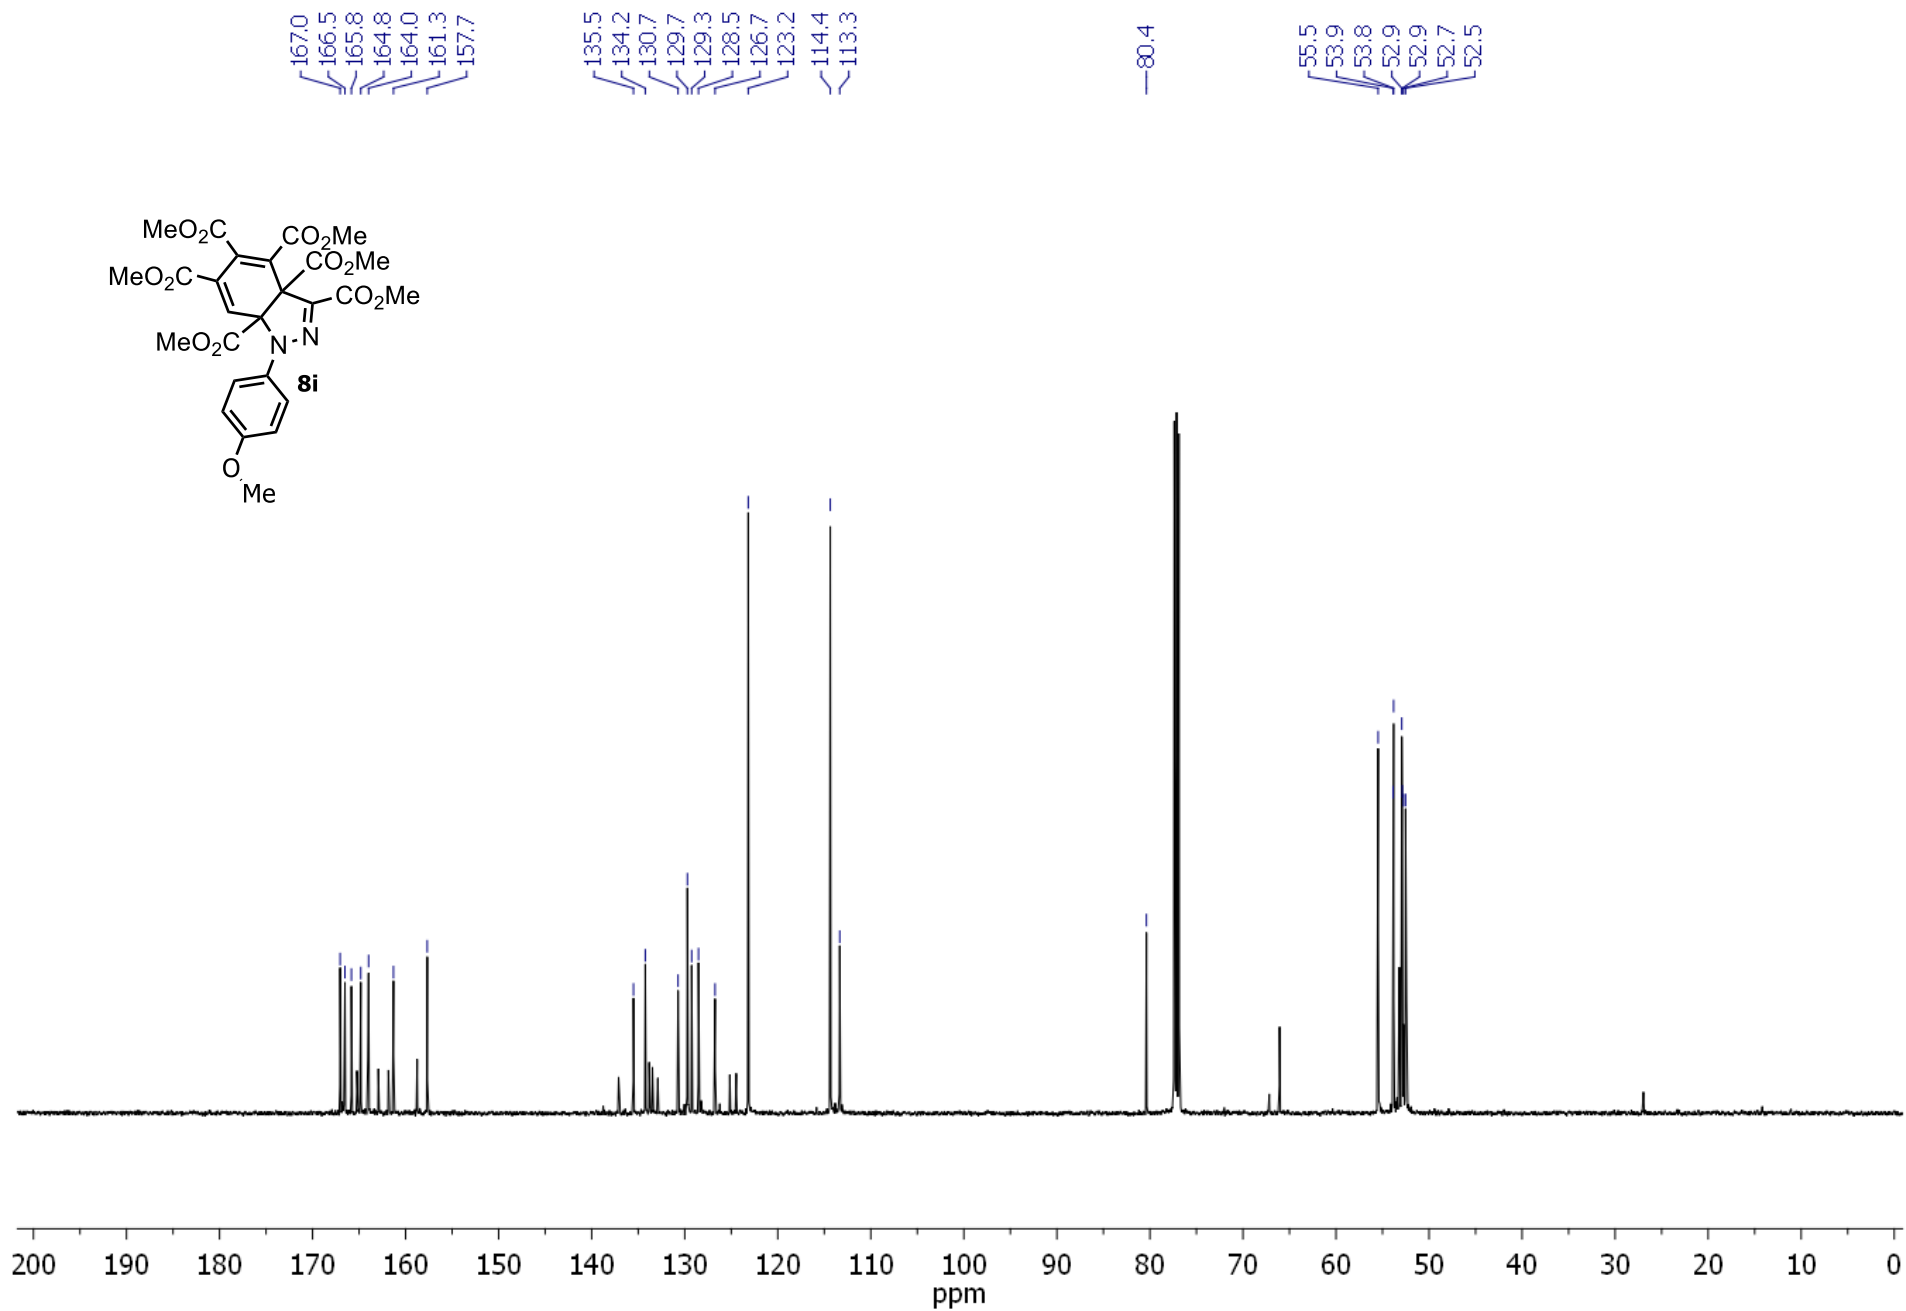

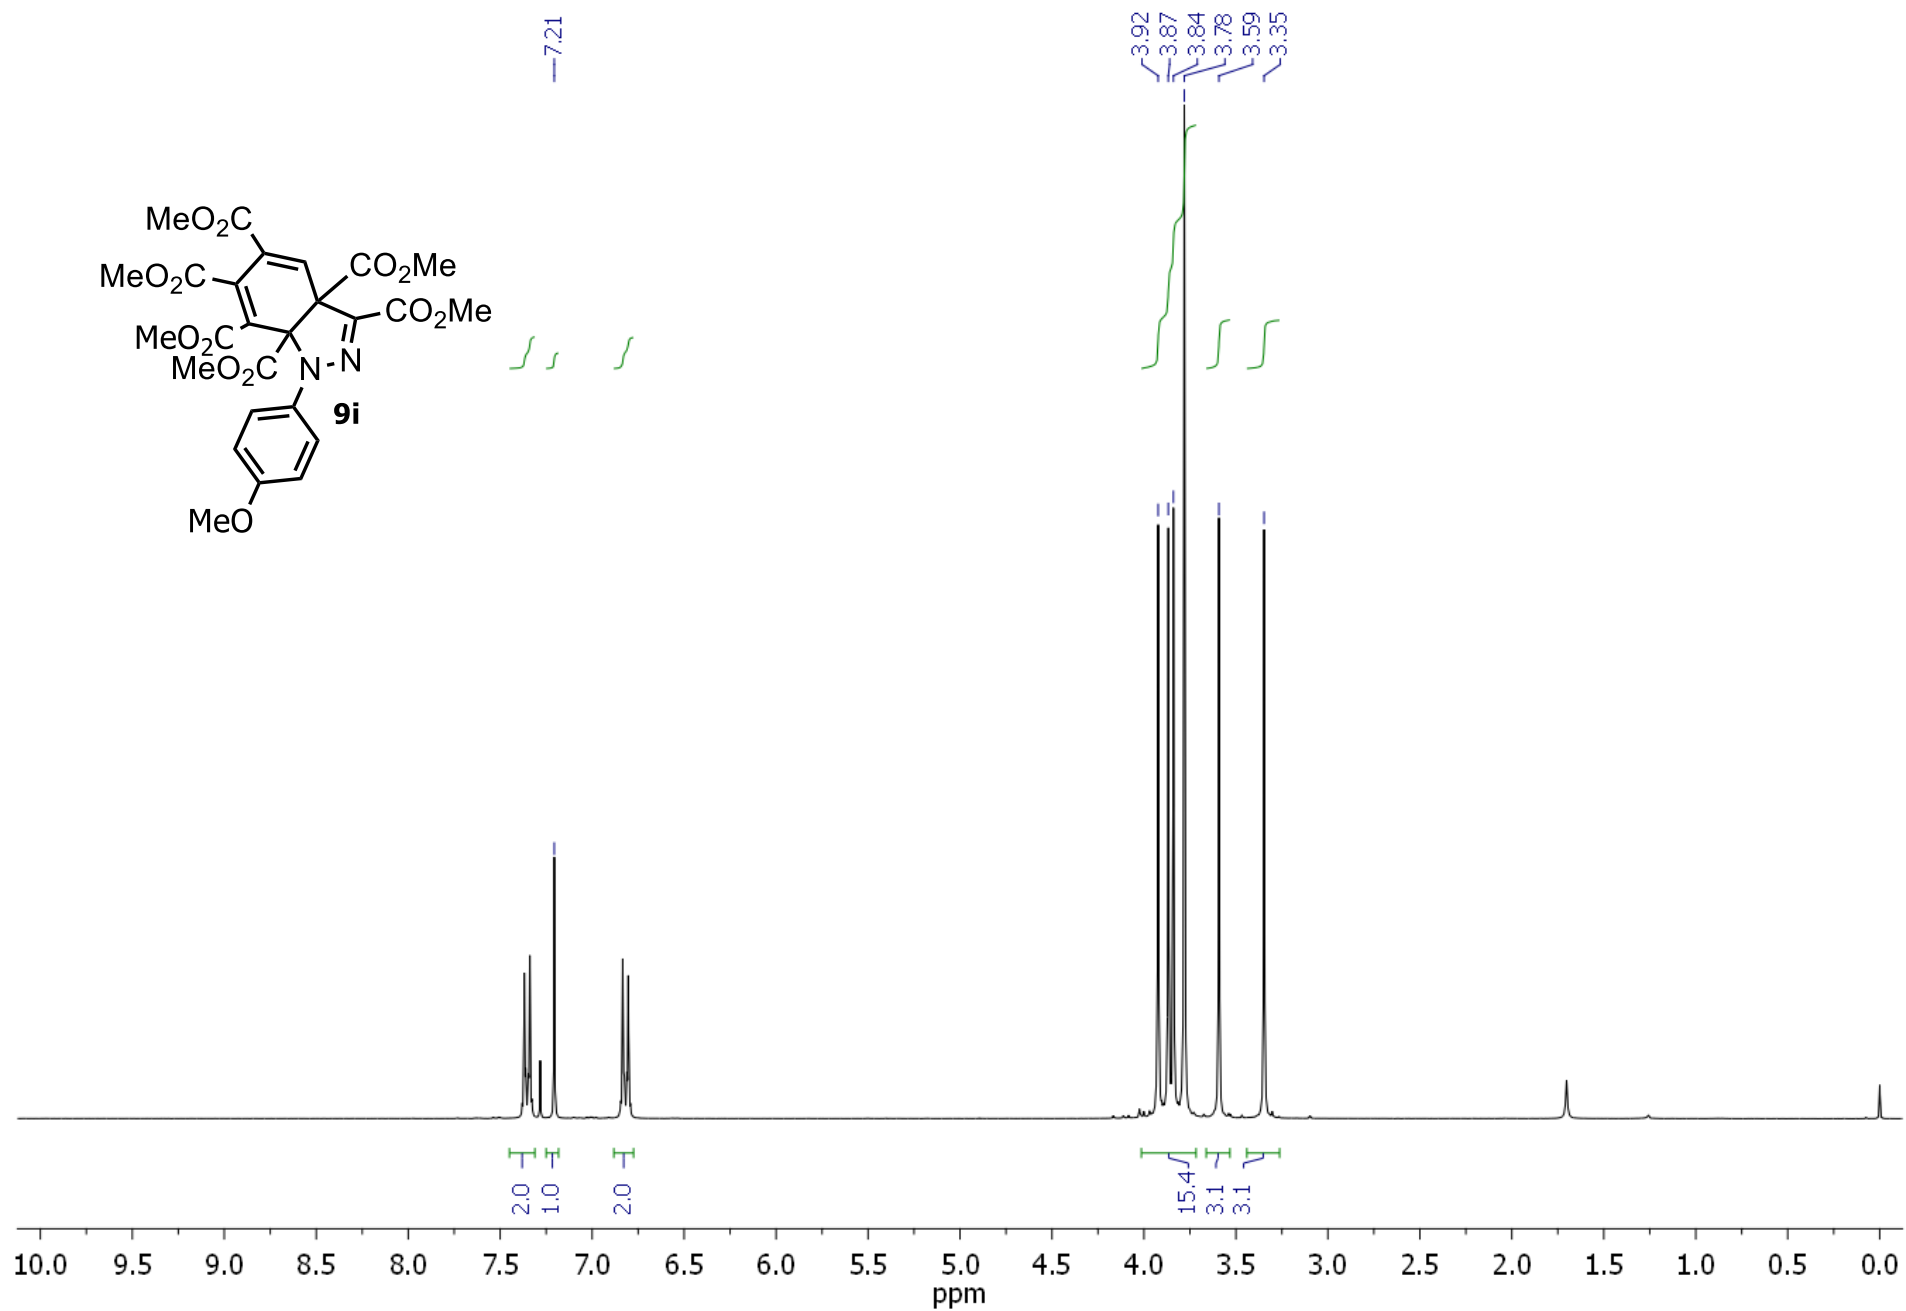

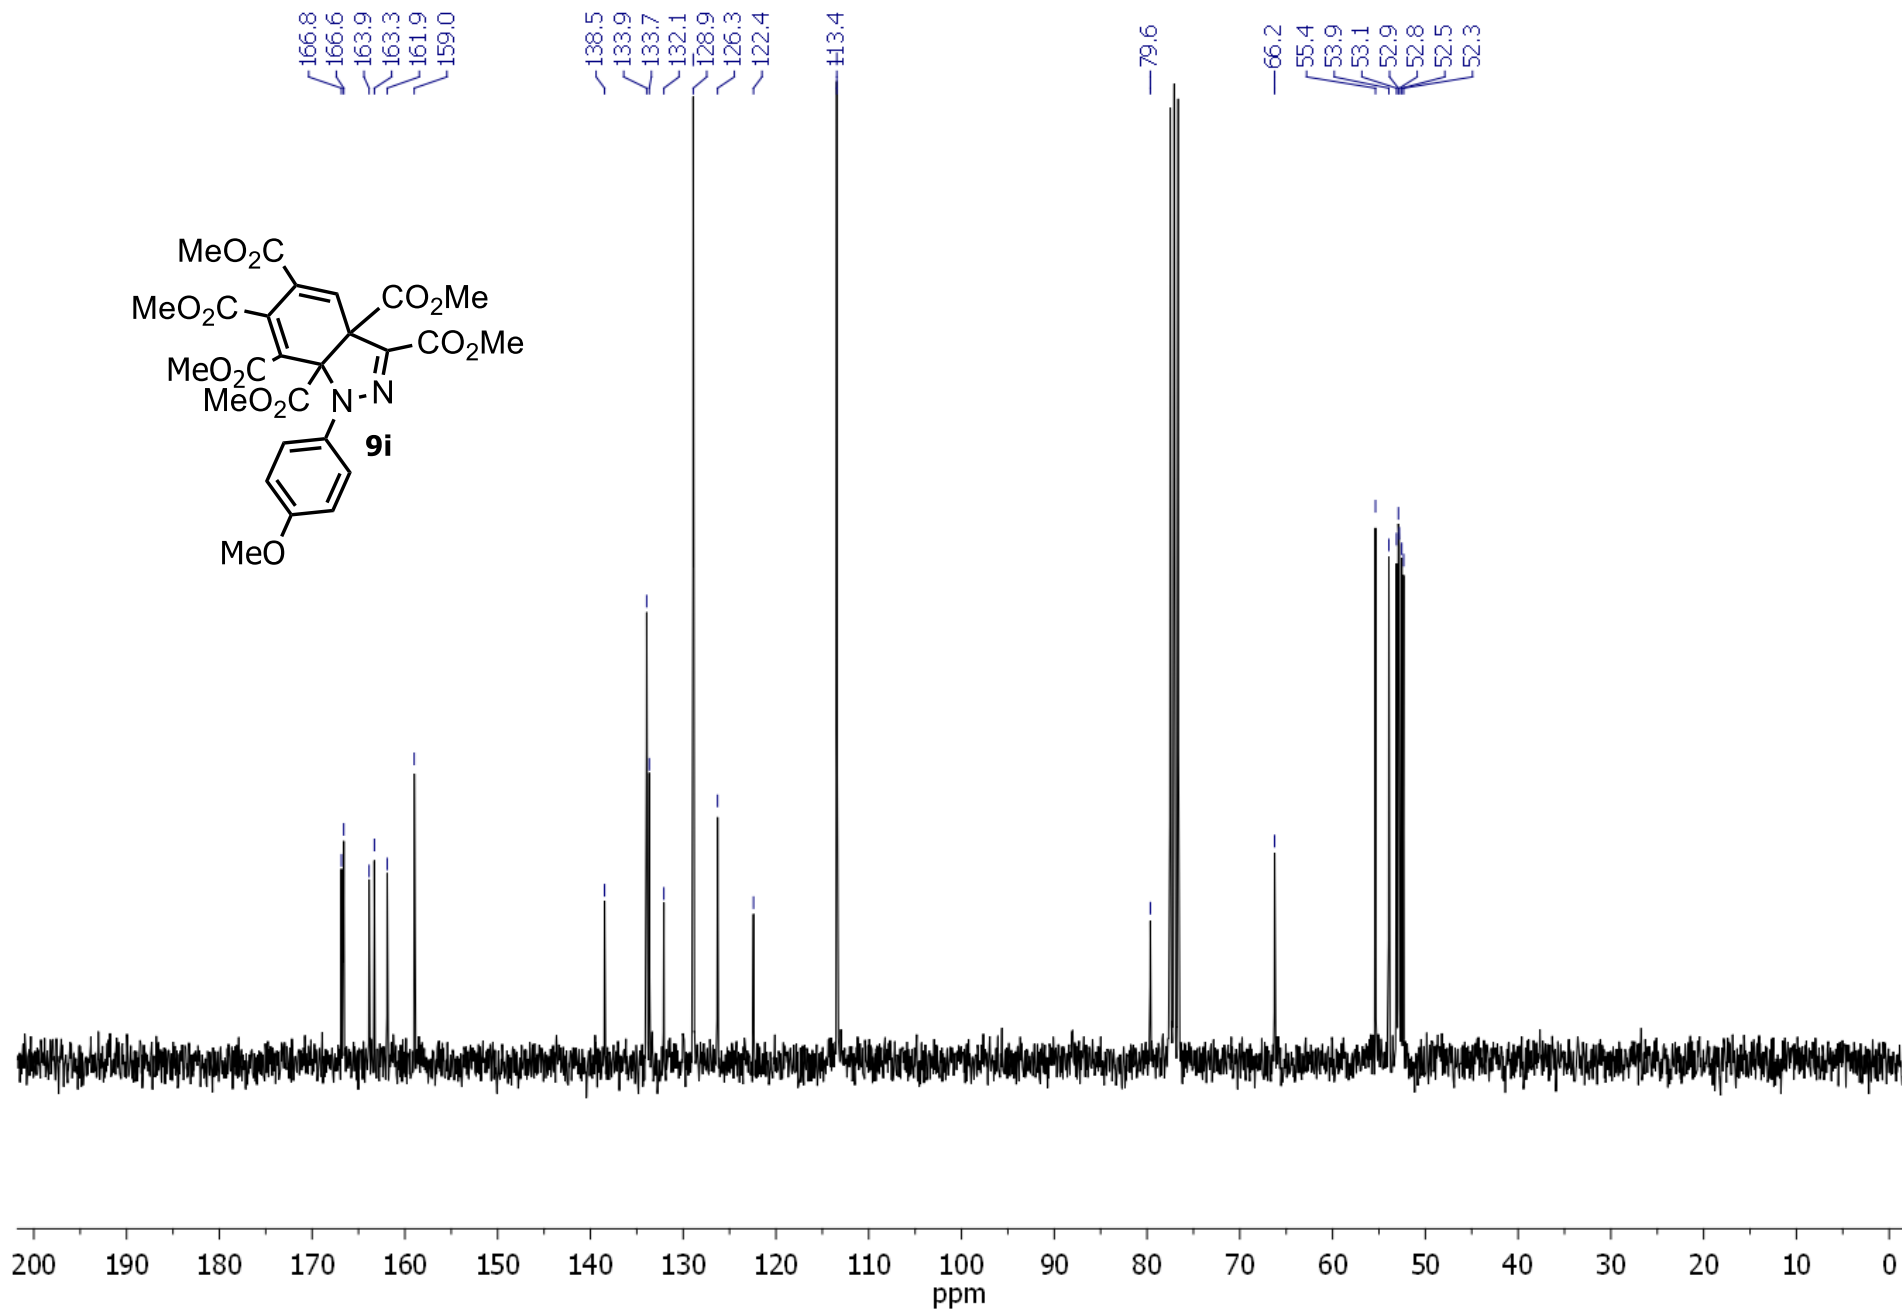

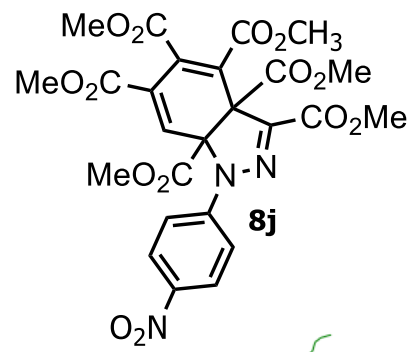

7.09

3.90  
3.89  
3.81  
3.81  
3.80  
3.78  
3.77

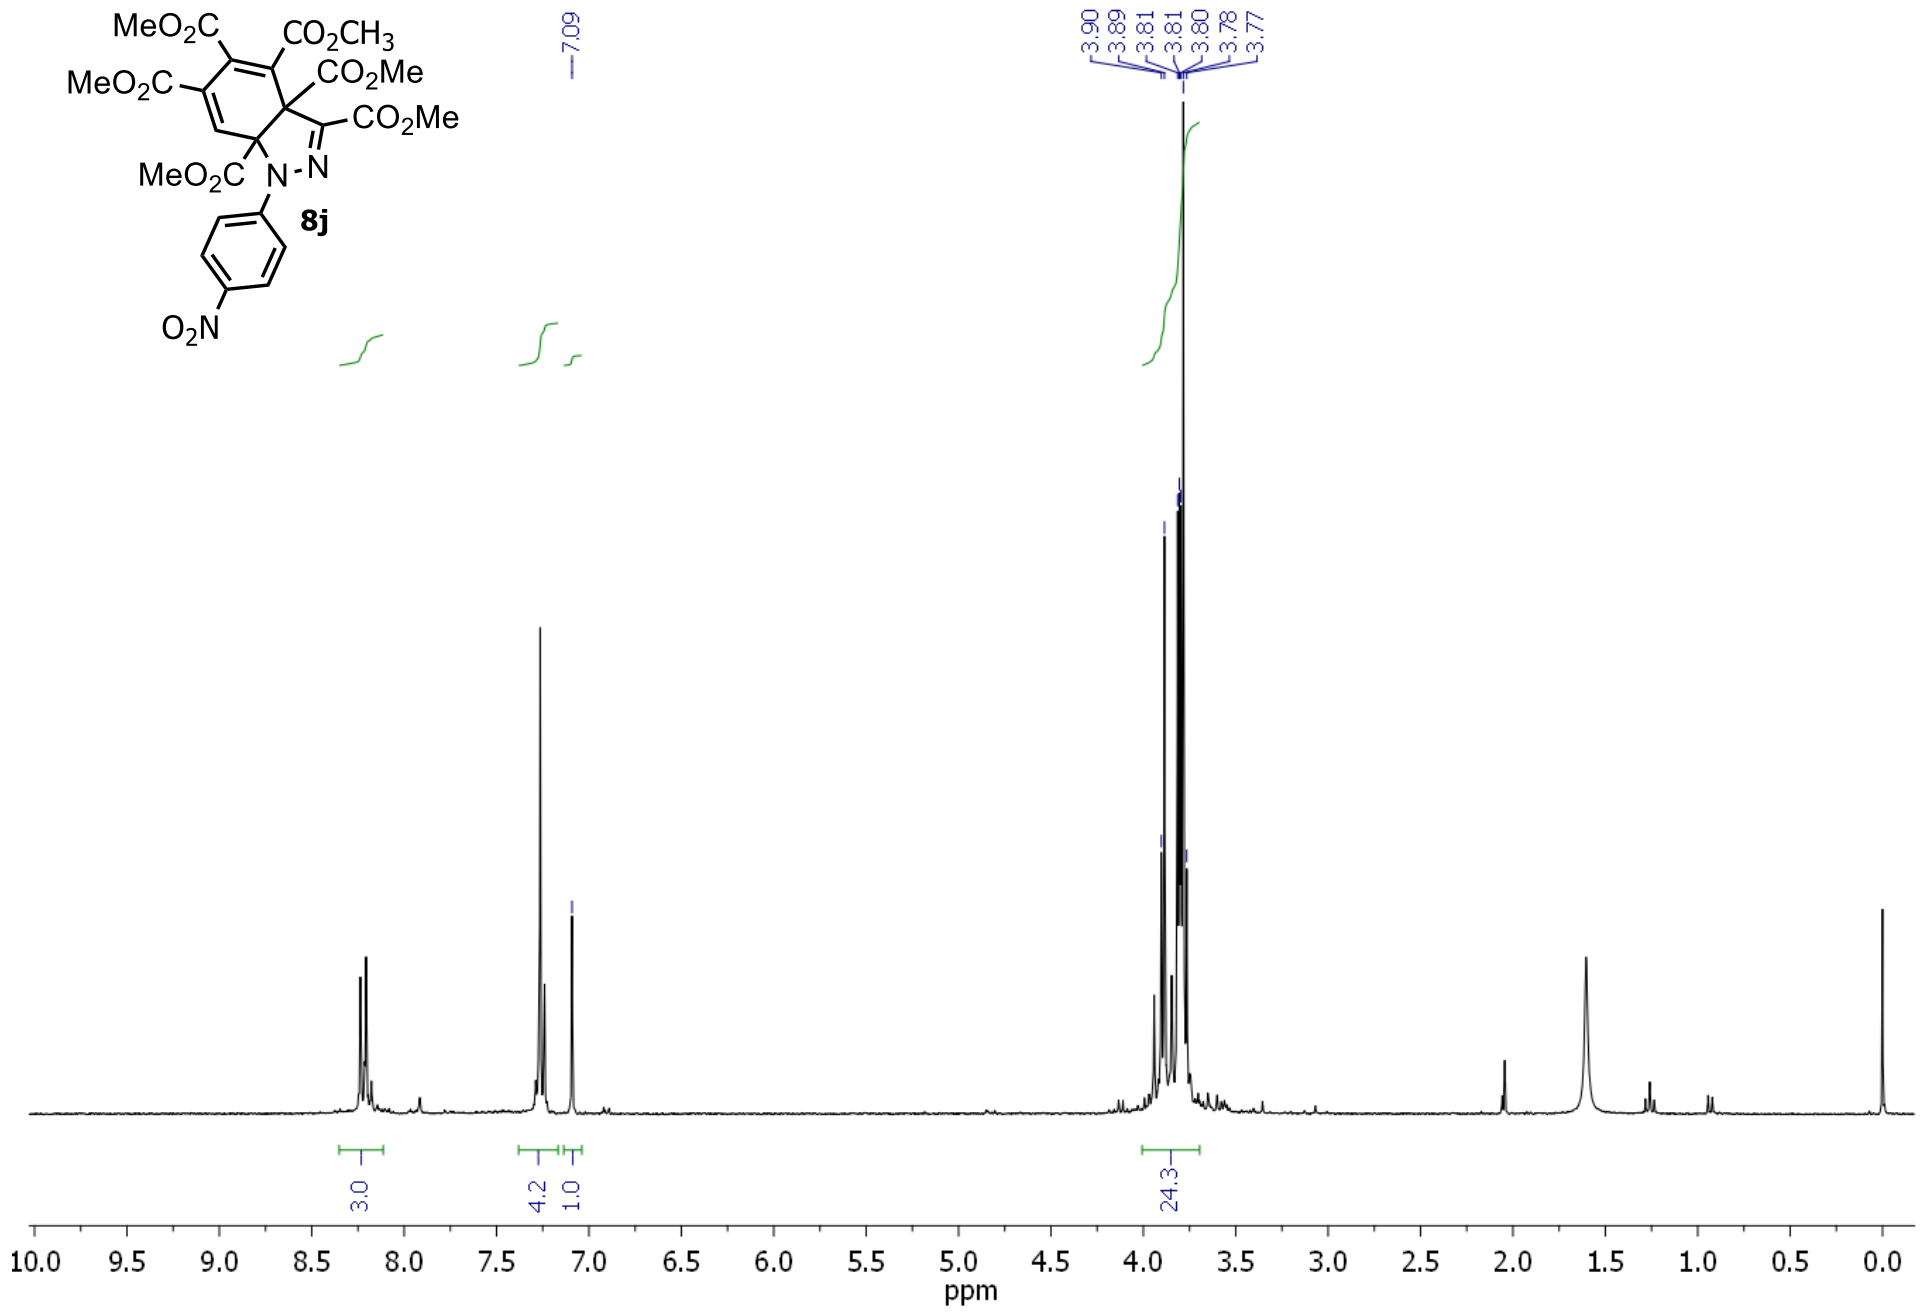



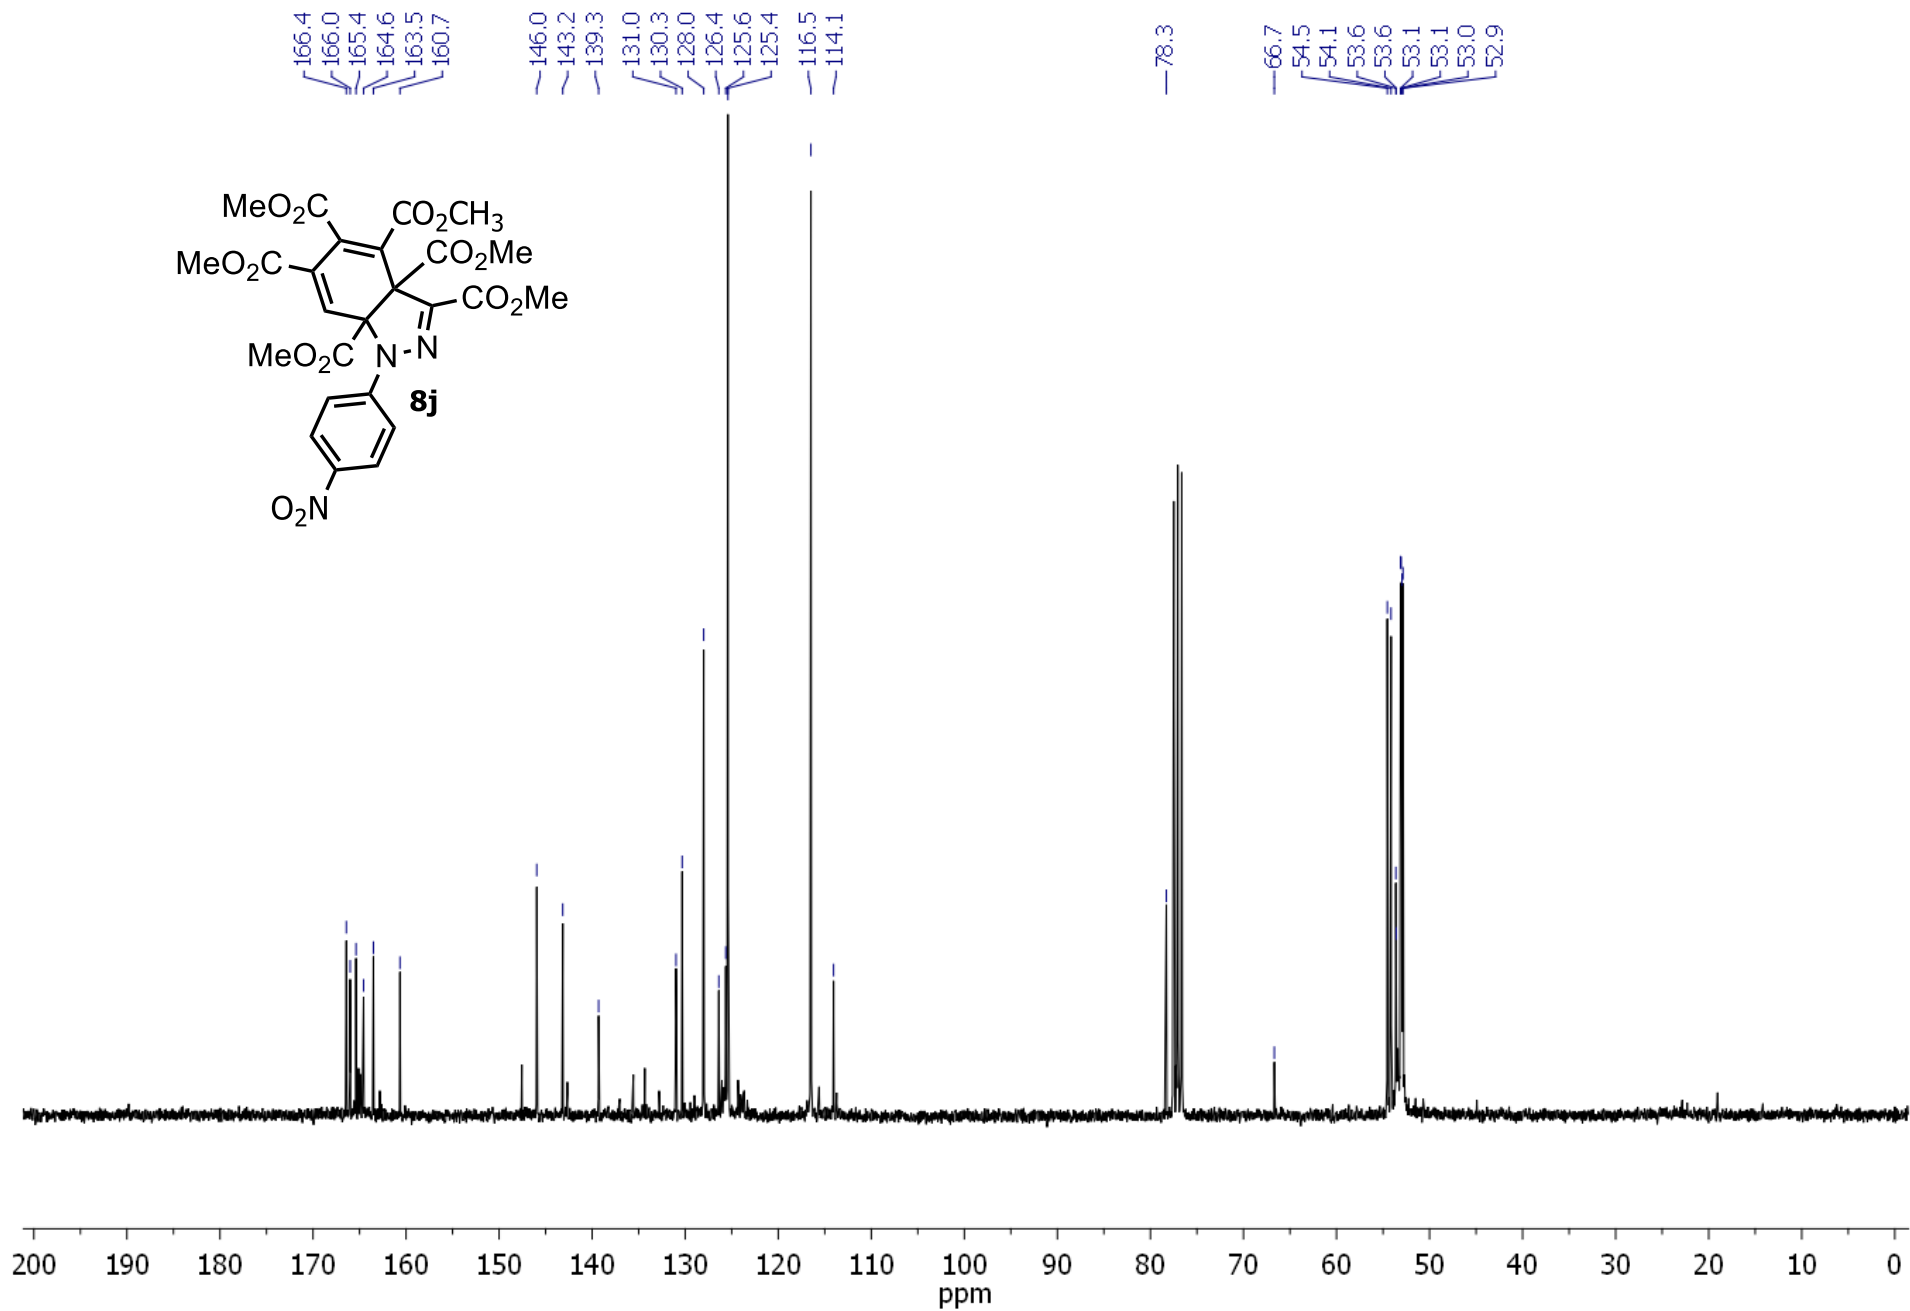

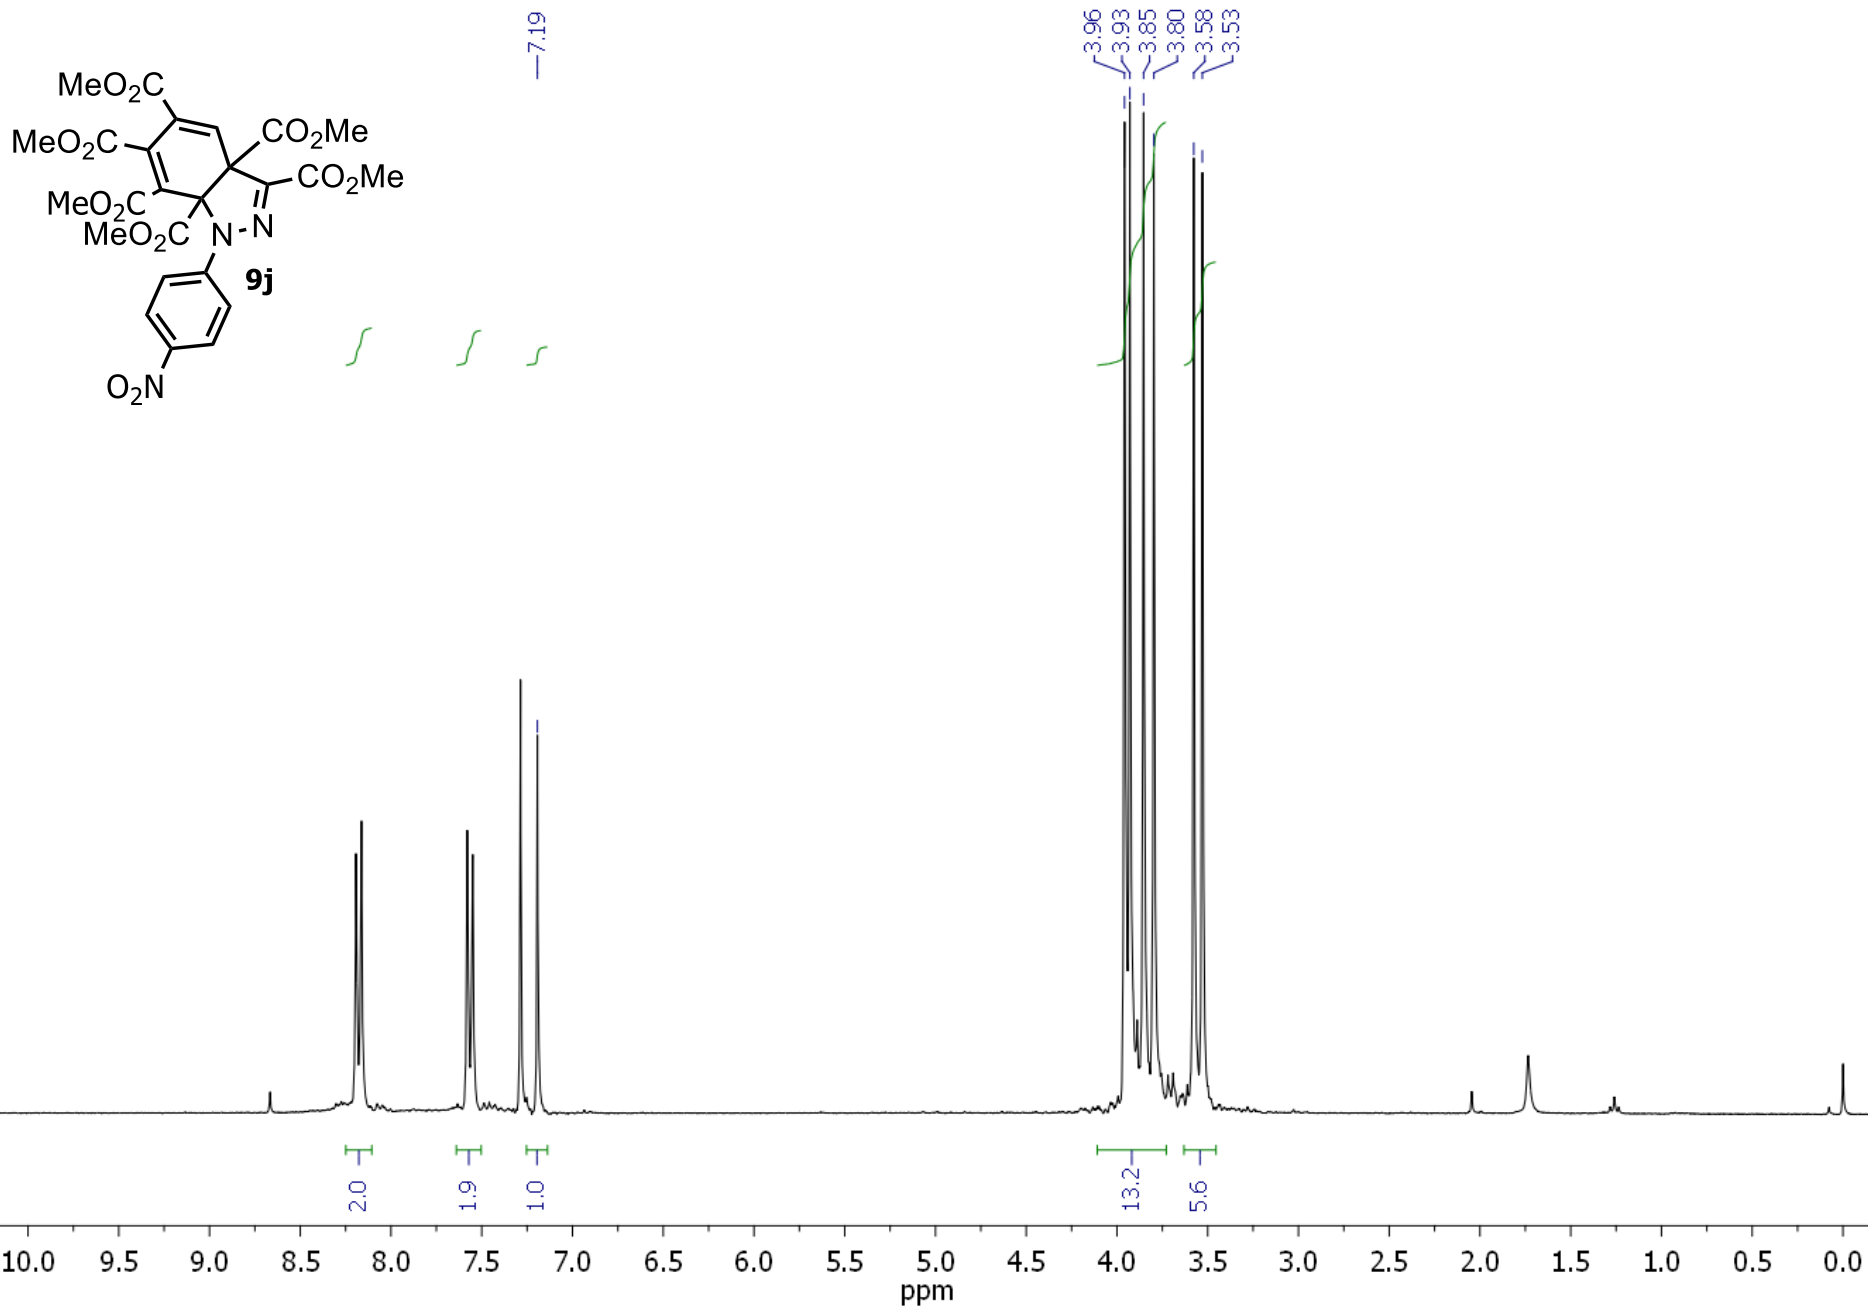

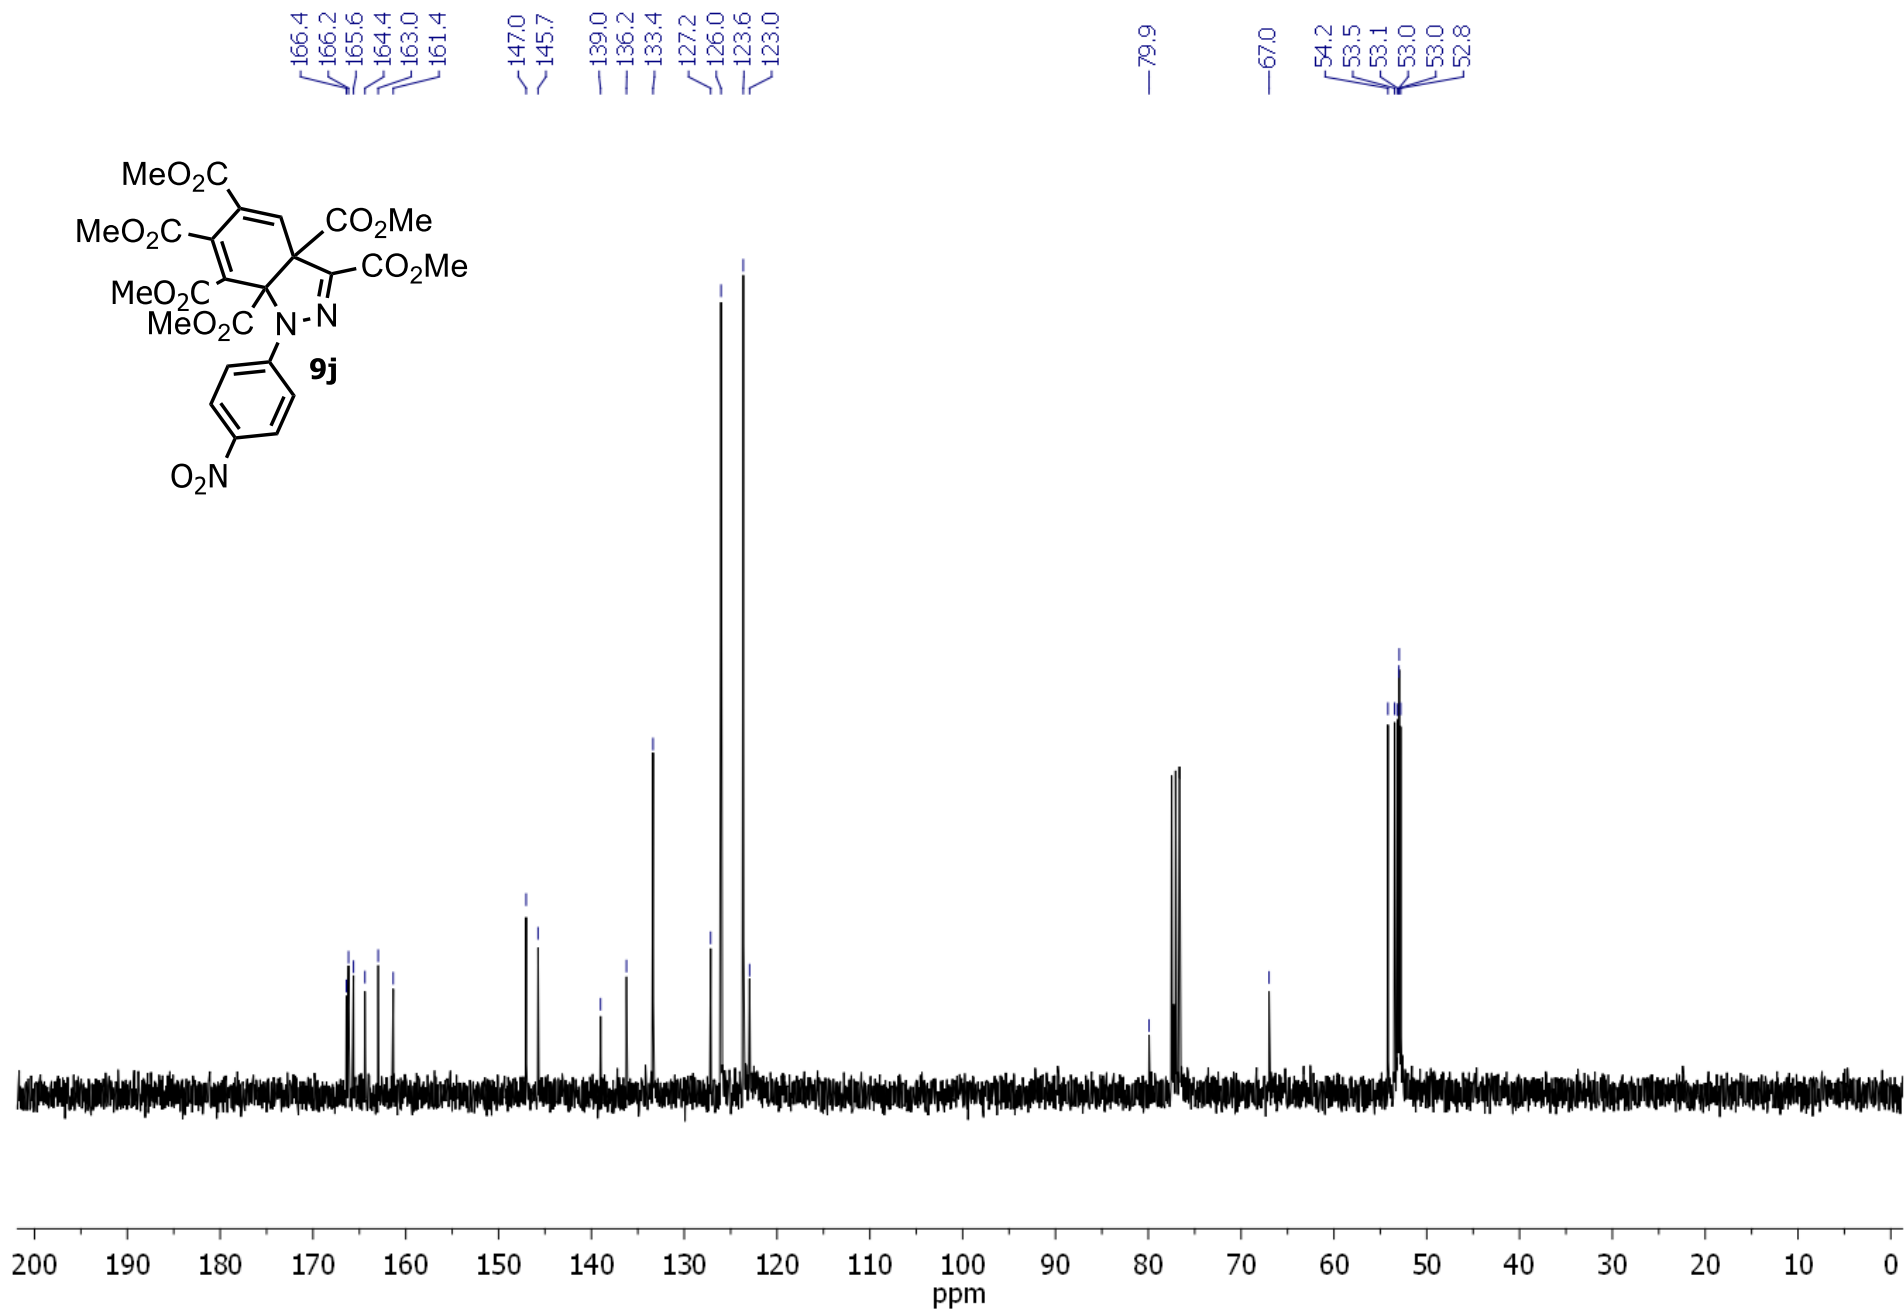

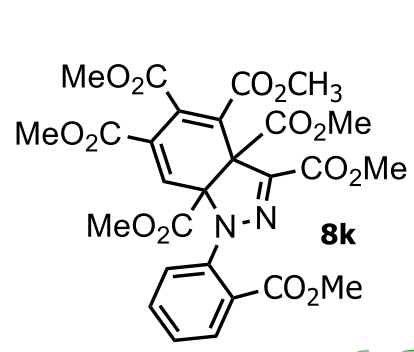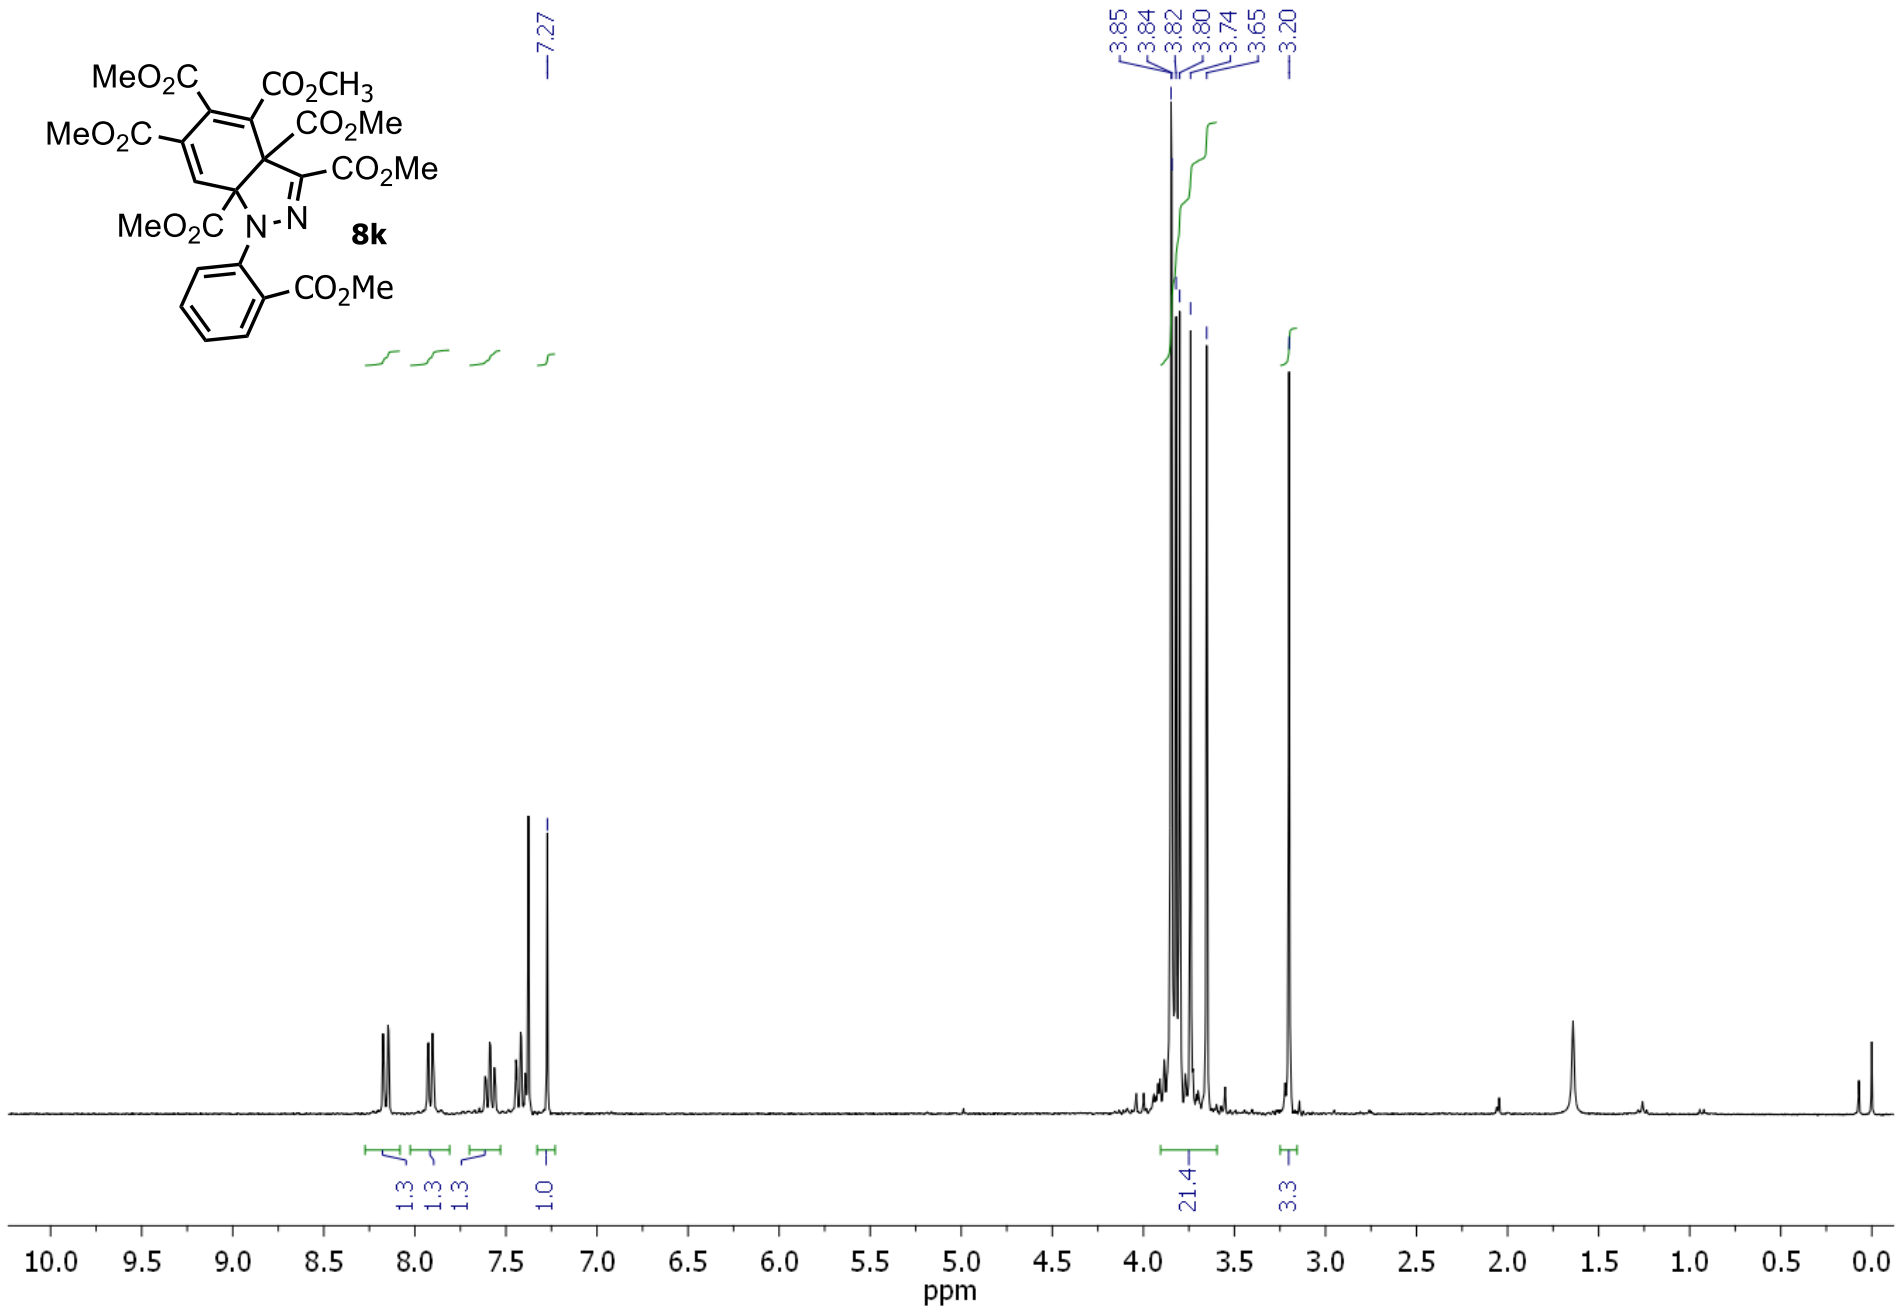

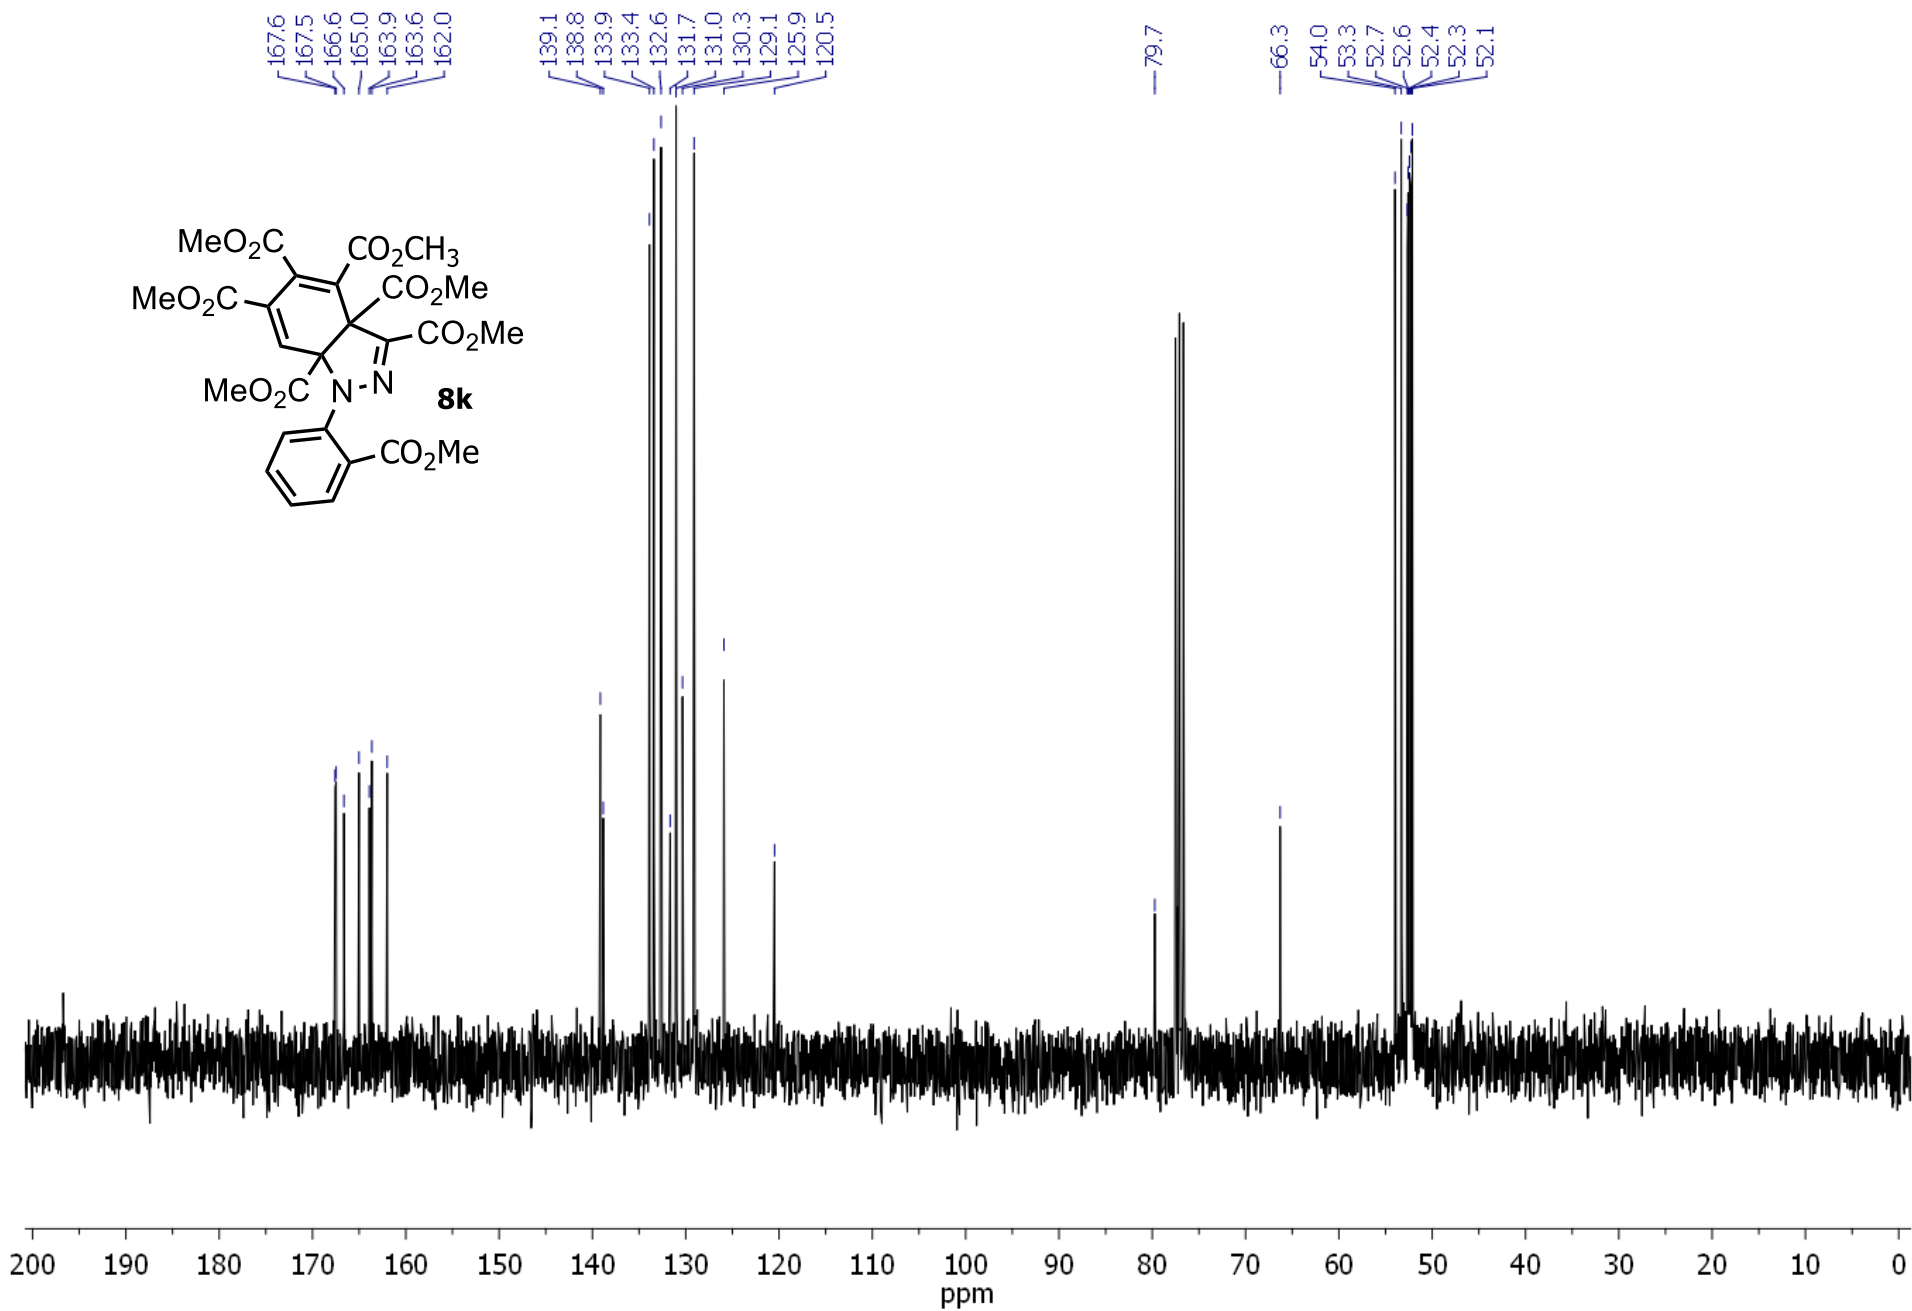

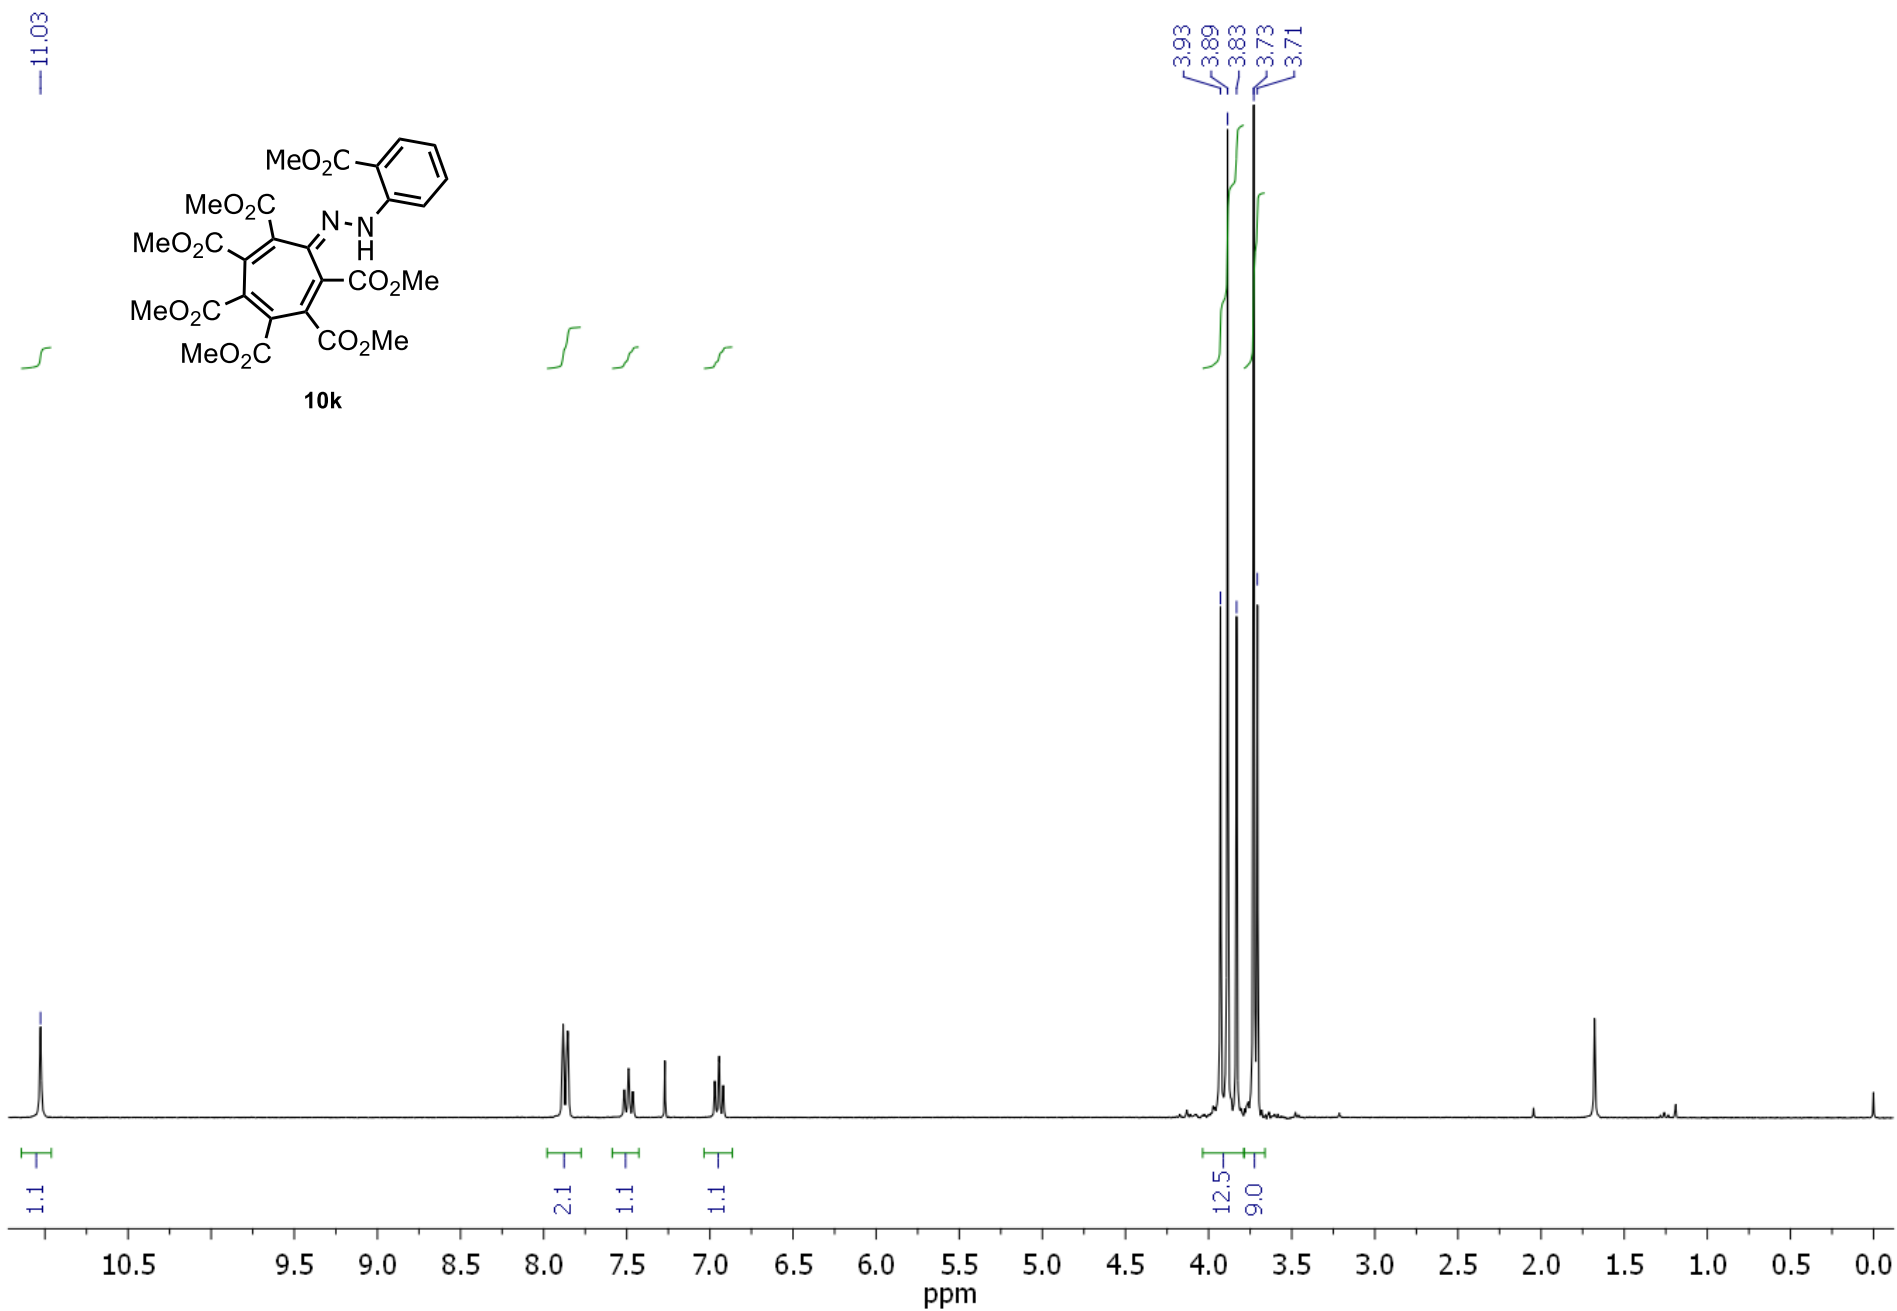

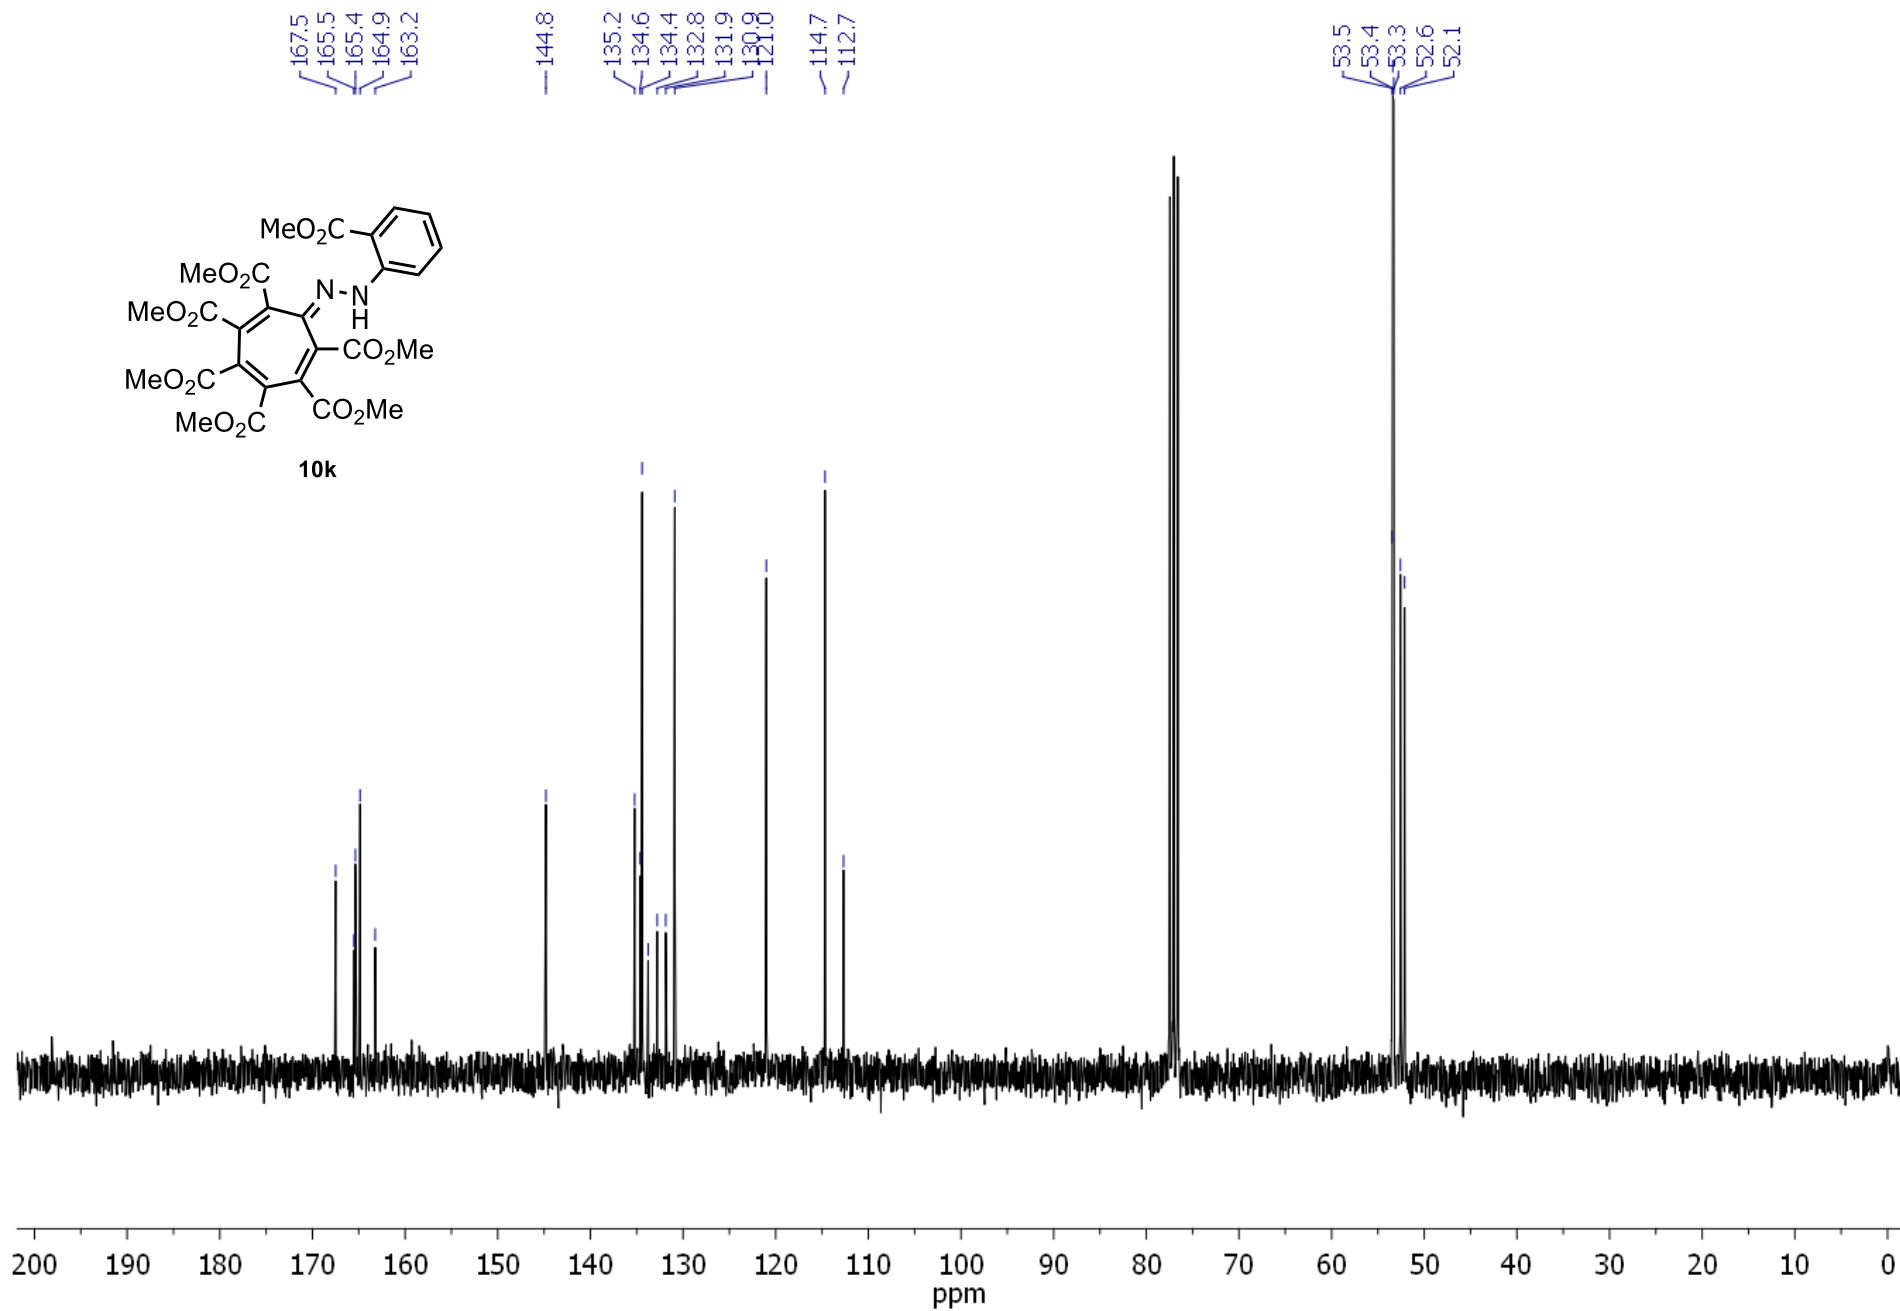

## 6. References

- (1) Ilyushchenko, M. K.; Salikov, R. F.; Sokolova, A. D.; Litvinenko, V. V.; Belyy, A. Yu.; Platonov, D. N.; Tomilov, Y. V. *J. Org. Chem.* **2023**, *88*, 5661–5670. doi:10.1021/acs.joc.3c00142
- (2) Gund, S. H.; Balsane, K. E.; Nagarkar, J. M. *Tetrahedron Lett.* **2017**, *58*, 2936–2939. doi:10.1016/j.tetlet.2017.06.045
- (3) Heinrich, M. R.; Blank, O.; Ullrich, D.; Kirschstein, M. *J. Org. Chem.* **2007**, *72*, 9609–9616. doi:10.1021/jo701717k
- (4) Neese, F. *WIREs Comput. Mol. Sci.* **2012**, *2*, 73–78. doi:10.1002/wcms.81
- (5) Pracht, P.; Grimme, S.; Bannwarth, C.; Bohle, F.; Ehlert, S.; Feldmann, G.; Gorges, J.; Müller, M.; Neudecker, T.; Plett, C.; Spicher, S.; Steinbach, P.; Wesolowski, P. A.; Zeller, F. *J. Chem. Phys.* **2024**, *160*, 114110. doi:10.1063/5.0197592
- (6) Santra, G.; Sylvetsky, N.; Martin, J. M. L. *J. Phys. Chem. A* **2019**, *123*, 5129–5143. doi:10.1021/acs.jpca.9b03157
- (7) Lu, T.; Chen, F. *J. Comput. Chem.* **2012**, *33*, 580–592. doi:10.1002/jcc.22885
- (8) Knizia, G.; Klein, J. E. M. N. *Angew. Chem. Int. Ed.* **2015**, *54*, 5518–5522. doi:10.1002/anie.201410637
- (9) Ramos-Cordoba, E.; Postils, V.; Salvador, P. *J. Chem. Theory Comput.* **2015**, *11*, 1501–1508. doi:10.1021/ct501088v
